# Supplementary material for: Cu-β-CD-catalyzed Csp–P coupling of alkynes with dialkylphosphites and phosphine oxides
Source: Royal Society of Chemistry journal article supplement (doi:10.1039/d5ob00543d), 2025-01-01
Supplement: d5ob00543d1.pdf [file d5ob00543d1.pdf]

## Supporting Information

# **Cu- $\beta$ -CD-Catalyzed C<sub>sp</sub>-P Coupling of Alkynes with Dialkylphosphites and Phosphine oxides**

*Babak Kaboudin,<sup>\*a</sup> Elahe Yousefian Amirkhiz,<sup>a</sup> Ali Sabzalipour,<sup>a</sup> Fahimeh Varmaghani,<sup>a</sup> Tianjian Zhang,<sup>b</sup> Yanlong Gu<sup>b</sup>*

<sup>a</sup>Department of Chemistry, Institute for Advanced Studies in Basic Sciences, Gava Zang, Zanjan 45137-66731, Iran

<sup>b</sup>School of Chemistry and Chemical Engineering, Huazhong University of Science & Technology, Wuhan 430074, China

\*Corresponding author, Tel: +98 24 33153220; Fax: +98 24 33153232. E-mail address: [kaboudin@iasbs.ac.ir](mailto:kaboudin@iasbs.ac.ir)

## Table of Contents

|                                                                               |               |
|-------------------------------------------------------------------------------|---------------|
| <b>Experimental details and Characterization data for the compounds 3a-3t</b> | <b>S6-S13</b> |
| <b>Figure S1: <sup>1</sup>H NMR Spectra of 3a</b>                             | <b>S8-S64</b> |
| <b>Figure S2: <sup>13</sup>C NMR Spectra of 3a</b>                            |               |
| <b>Figure S3: <sup>31</sup>P NMR Spectra of 3a</b>                            |               |
| <b>Figure S4: <sup>1</sup>H NMR Spectra of 3b</b>                             |               |
| <b>Figure S5: <sup>13</sup>C NMR Spectra of 3b</b>                            |               |

**Figure S6:  $^{31}\text{P}$  NMR Spectra of 3b**

**Figure S7:  $^1\text{H}$  NMR Spectra of 3c**

**Figure S8:  $^{13}\text{C}$  NMR Spectra of 3c**

**Figure S9:  $^{31}\text{P}$  NMR Spectra of 3c**

**Figure S10:  $^1\text{H}$  NMR Spectra of 3e**

**Figure S11:  $^{13}\text{C}$  NMR Spectra of 3e**

**Figure S12:  $^{31}\text{P}$  NMR Spectra of 3e**

**Figure S13:  $^1\text{H}$  NMR Spectra of 3f**

**Figure S14:  $^{13}\text{C}$  NMR Spectra of 3f**

**Figure S15:  $^{31}\text{P}$  NMR Spectra of 3f**

**Figure S16:  $^1\text{H}$  NMR Spectra of 3g**

**Figure S17:  $^{13}\text{C}$  NMR Spectra of 3g**

**Figure S18:  $^{31}\text{P}$  NMR Spectra of 3g**

**Figure S19:  $^1\text{H}$  NMR Spectra of 3h**

**Figure S20:  $^{13}\text{C}$  NMR Spectra of 3h**

**Figure S21:  $^{31}\text{P}$  NMR Spectra of 3h**

**Figure S22:  $^1\text{H}$  NMR Spectra of 3i**

**Figure S23:  $^{13}\text{C}$  NMR Spectra of 3i**

**Figure S24:  $^{31}\text{P}$  NMR Spectra of 3i**

**Figure S25:  $^1\text{H}$  NMR Spectra of 3j**

**Figure S26:  $^{13}\text{C}$  NMR Spectra of 3j**

**Figure S27:  $^{31}\text{P}$  NMR Spectra of 3j**

**Figure S28:  $^1\text{H}$  NMR Spectra of 3k**

**Figure S29:  $^{13}\text{C}$  NMR Spectra of 3k**

**Figure S30:  $^{31}\text{P}$  NMR Spectra of 3k**

**Figure S31:  $^1\text{H}$  NMR Spectra of 3l**

**Figure S32:  $^{13}\text{C}$  NMR Spectra of 3l**

**Figure S33:  $^{31}\text{P}$  NMR Spectra of 3l**

**Figure S34:  $^1\text{H}$  NMR Spectra of 3m**

**Figure S35:  $^{13}\text{C}$  NMR Spectra of 3m**

**Figure S36:  $^{31}\text{P}$  NMR Spectra of 3m**

**Figure S37:  $^1\text{H}$  NMR Spectra of 3n**

**Figure S38:  $^{13}\text{C}$  NMR Spectra of 3n**

**Figure S39:  $^{31}\text{P}$  NMR Spectra of 3n**

**Figure S40:  $^1\text{H}$  NMR Spectra of 3o**

**Figure S41:  $^{13}\text{C}$  NMR Spectra of 3o**

**Figure S42:  $^{31}\text{P}$  NMR Spectra of 3o**

**Figure S43:  $^1\text{H}$  NMR Spectra of 3p**

**Figure S44:  $^{13}\text{C}$  NMR Spectra of 3p**

**Figure S45:  $^{31}\text{P}$  NMR Spectra of 3p**

**Figure S46:  $^1\text{H}$  NMR Spectra of 3q**

**Figure S47:  $^{13}\text{C}$  NMR Spectra of 3q**

**Figure S48:  $^{31}\text{P}$  NMR Spectra of 3q**

**Figure S49:  $^1\text{H}$  NMR Spectra of 3r**

**Figure S50:  $^{13}\text{C}$  NMR Spectra of 3r**

**Figure S51:  $^{31}\text{P}$  NMR Spectra of 3r**

**Figure S52:  $^1\text{H}$  NMR Spectra of 3s**

**Figure S53:  $^{13}\text{C}$  NMR Spectra of 3s**

**Figure S54:  $^{31}\text{P}$  NMR Spectra of 3s**

**Figure S55:  $^1\text{H}$  NMR Spectra of 3t**

**Figure S56:  $^{13}\text{C}$  NMR Spectra of 3t**

**Figure S57:  $^{31}\text{P}$  NMR Spectra of 3t**

## Experimental Section

### Procedure for the synthesis of alkynes (aryl propargyl ethers):

The aryl propargyl ethers **1** was obtained according to the literature report with slight modification [1]. Phenol derivative (3.5 mmol) was added to a mixture of  $K_2CO_3$  (7.2 mmol) in dry DMF (22 mL) and the mixture was stirred for 15 min at 80 °C. Propargyl bromide (3.9 mmol) was added to the reaction mixture and the mixture was stirred for 12 h at 80 °C. After completion of the reaction (12 h), the mixture was diluted with NaOH (10%, 50 mL) and extracted with diethyl ether (3x50). The organic phase was washed with brine and dried over sodium sulfate.

#### (Prop-2-yn-1-yloxy)benzene

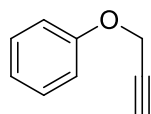

Yellow viscous oil [2]

$^1H$  NMR (400 MHz,  $CDCl_3$ )  $\delta$ : 7.41-7.30 (m, 2H), 7.09-6.99 (m, 3H), 4.74 (d,  $J$  = 2.4 Hz, 2H), 2.57 (t,  $J$  = 2.4 Hz, 1H).  $^{13}C$  NMR (101 MHz,  $CDCl_3$ )  $\delta$ : 157.5, 129.5, 121.6, 114.9, 78.6, 75.5, 55.7.

#### 1,3-dimethyl-5-(prop-2-yn-1-yloxy)benzene

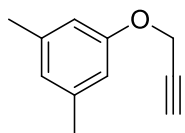

Yellow viscous oil [2]

$^1H$  NMR (400 MHz,  $CDCl_3$ )  $\delta$ : 6.68 (s, 1H), 6.66 (s, 2H), 4.70 (d,  $J$  = 2.4 Hz, 2H), 2.56 (t,  $J$  = 2.4 Hz, 1H), 2.35 (s,  $J$  = 0.7 Hz, 6H).  $^{13}C$  NMR (101 MHz,  $CDCl_3$ )  $\delta$ : 157.6, 139.3, 123.3, 112.6, 78.9, 75.2, 55.6, 21.4.

**1-methoxy-3-(prop-2-yn-1-yloxy)benzene**

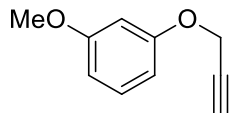

Yellow viscous oil [2]

$^1\text{H}$  NMR (400 MHz,  $\text{CDCl}_3$ )  $\delta$ : 7.33-7.19 (m, 1H), 6.66-6.53 (m, 3H), 4.71 (d,  $J=2.4$ , 2H), 3.82 (s, 3H), 2.56 (t,  $J=2.4$  Hz, 1H);  $^{13}\text{C}$  NMR (101 MHz,  $\text{CDCl}_3$ )  $\delta$ : 160.8, 158.8, 129.9, 107.0, 106.9, 101.4, 78.5, 75.5, 55.8, 55.3.

**1-(tert-butyl)-4-(prop-2-yn-1-yloxy)benzene**

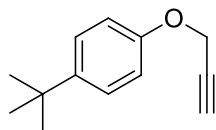

Yellow viscous oil [2]

$^1\text{H}$  NMR (400 MHz,  $\text{CDCl}_3$ )  $\delta$ : 7.43 (d,  $J=7.8$  Hz, 2H), 7.03 (d,  $J=7.8$  Hz, 2H), 4.76 (d,  $J=2.2$  Hz, 2H), 2.62-2.58 (m, 1H), 1.46-1.40 (m, 9H).  $^{13}\text{C}$  NMR (101 MHz,  $\text{CDCl}_3$ )  $\delta$ : 155.4, 144.3, 126.3, 114.4, 79.0, 75.4, 55.8, 34.2, 31.6.

**2-(prop-2-yn-1-yloxy)naphthalene**

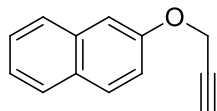

Yellow viscous oil [2]

$^1\text{H}$  NMR (400 MHz,  $\text{CDCl}_3$ )  $\delta$ : 7.91-7.80 (m, 3H), 7.60-7.40 (m, 2H), 7.32 - 7.25 (m, 2H), 4.87 (d,  $J = 2.4$  Hz, 2H), 2.65 (t,  $J = 2.4$  Hz, 1H).  $^{13}\text{C}$  NMR (101 MHz,  $\text{CDCl}_3$ )  $\delta$ : 155.5, 134.4, 129.7, 129.4, 127.8, 127.0, 126.6, 124.1, 118.8, 107.5, 78.6, 75.8, 55.9.

### References:

- [1] S. Keskin, M. Balci, *Org. Lett.* **2015**, 17, 964–967.
- [2] Shinde, J., Suresh, S., Kavala, V., & Yao, C. *Chem. Commun.* **2024**, 60, 3790-3793.
- [3] Kaboudin, B.; Abedi, Y.; Yokomatsu, T. *Eur. J. Org. Chem.* **2011**, 2011, 6656-6662.
- [4] Liu, L. L., Wu, Y., Wang, Z., Zhu, J., & Zhao, Y. *J. Org. Chem.* **2014**, 79, 6816-6822.

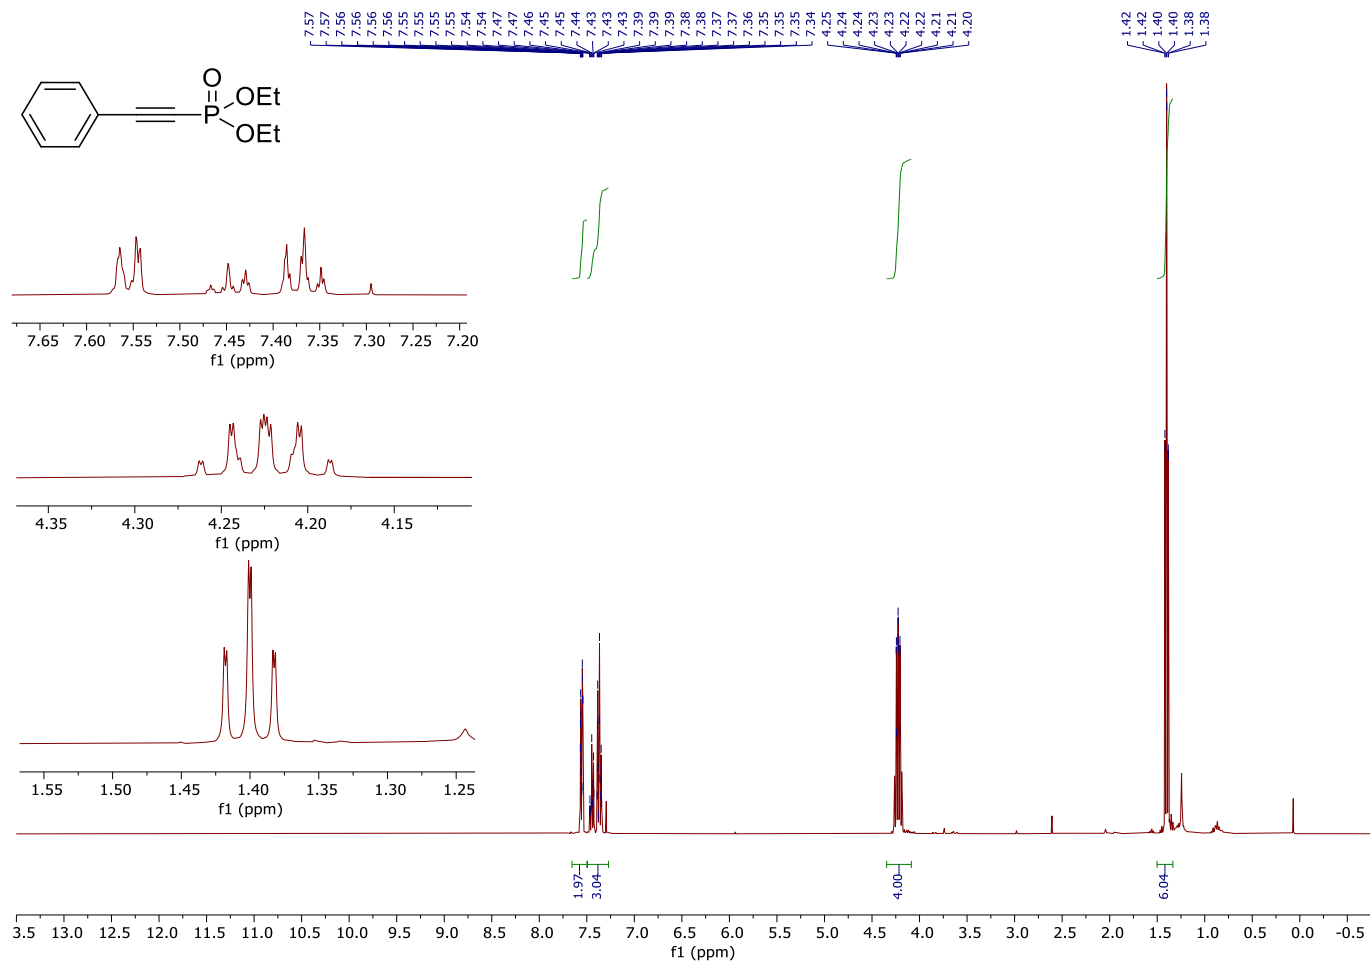

**Figure S1:  $^1\text{H}$  NMR Spectra of 3a**



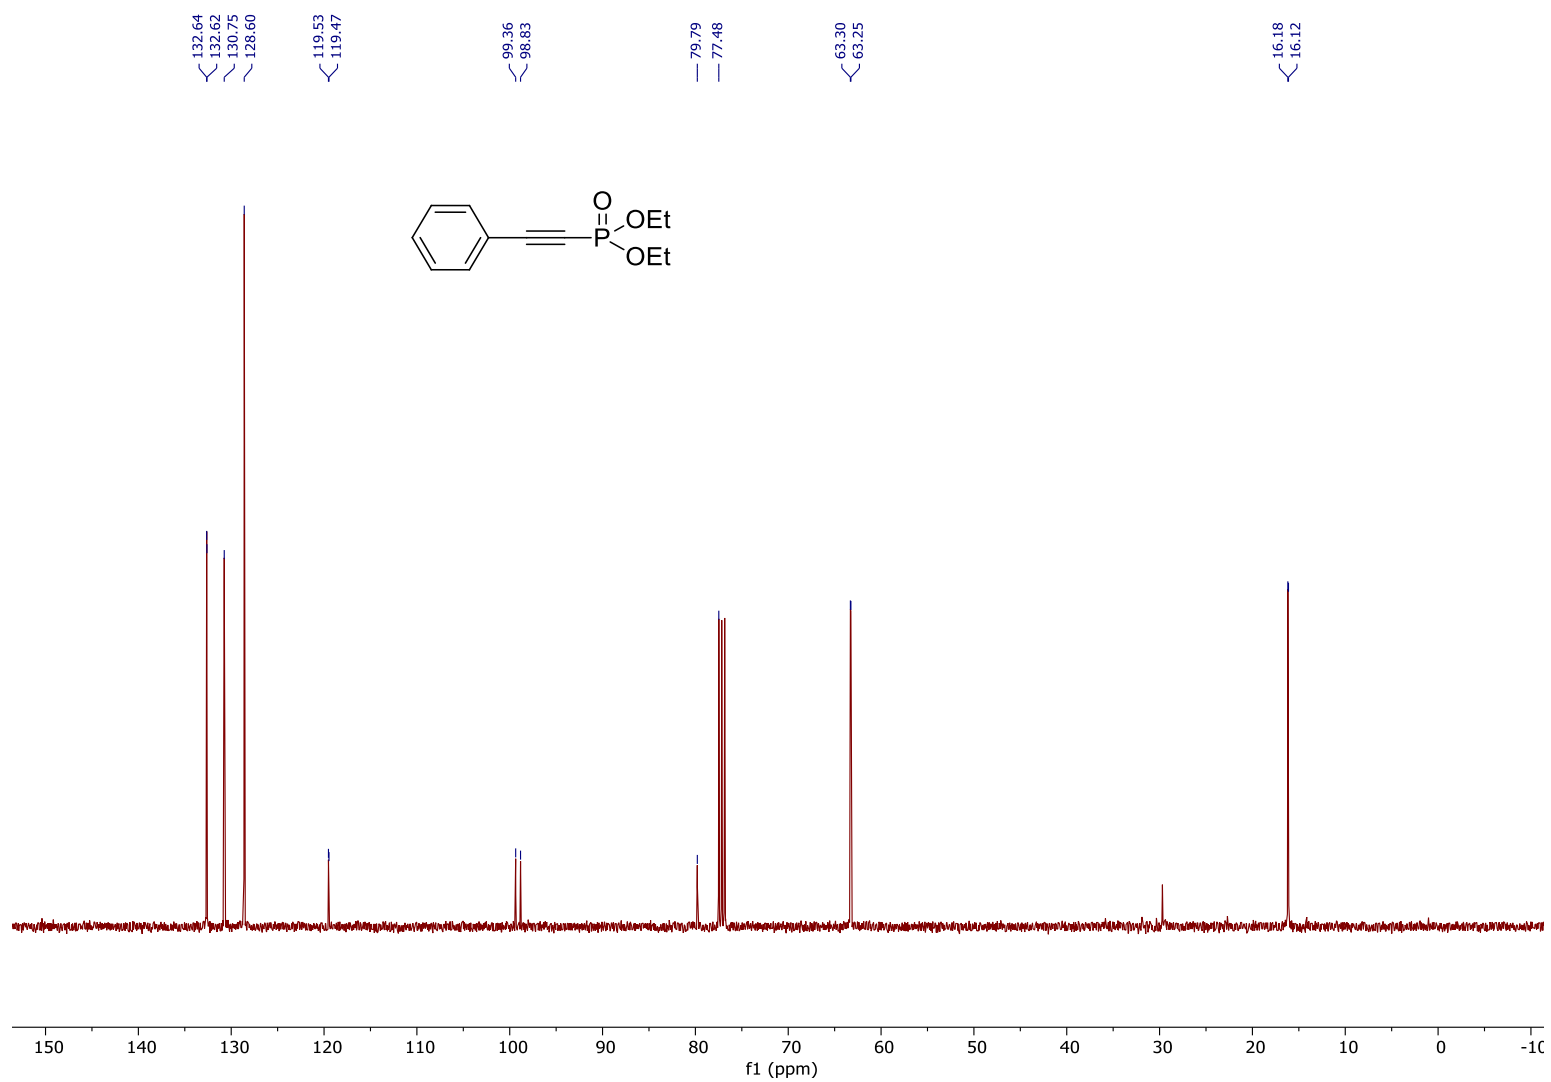

Figure S2: <sup>13</sup>C NMR Spectra of 3a

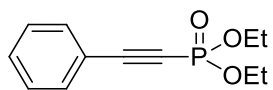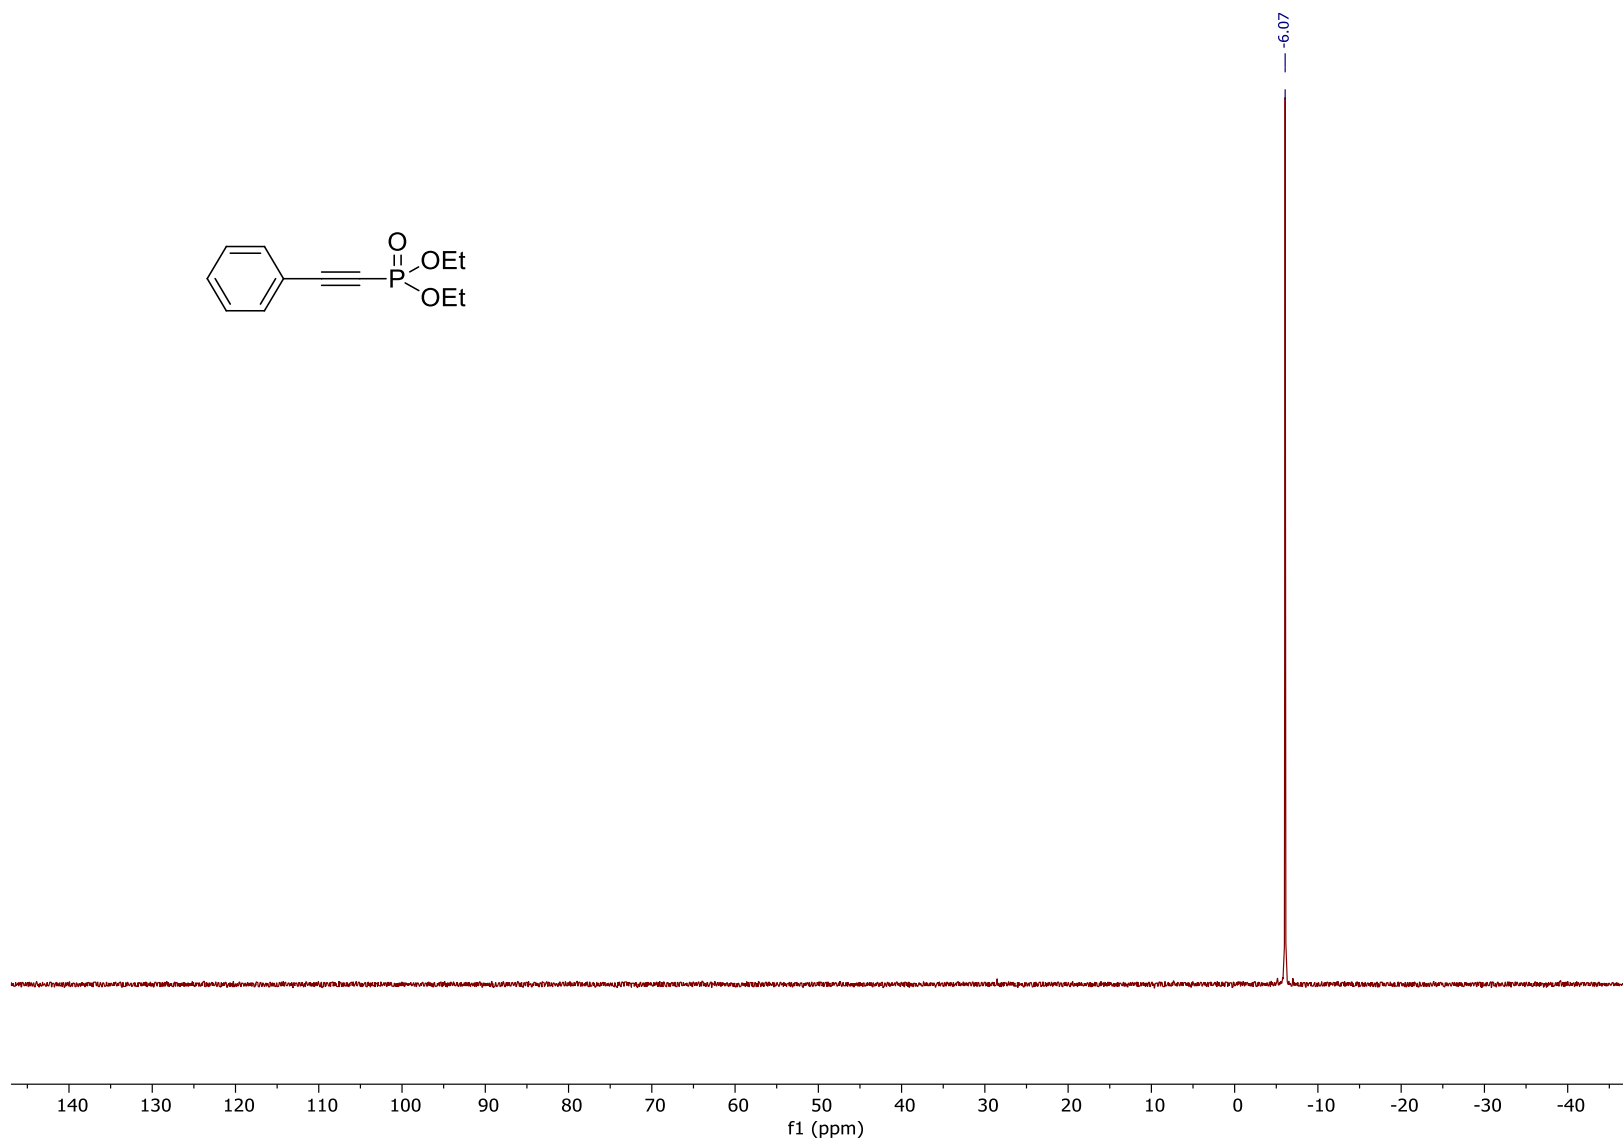

**Figure S3:  $^{31}\text{P}$  NMR Spectra of 3a**

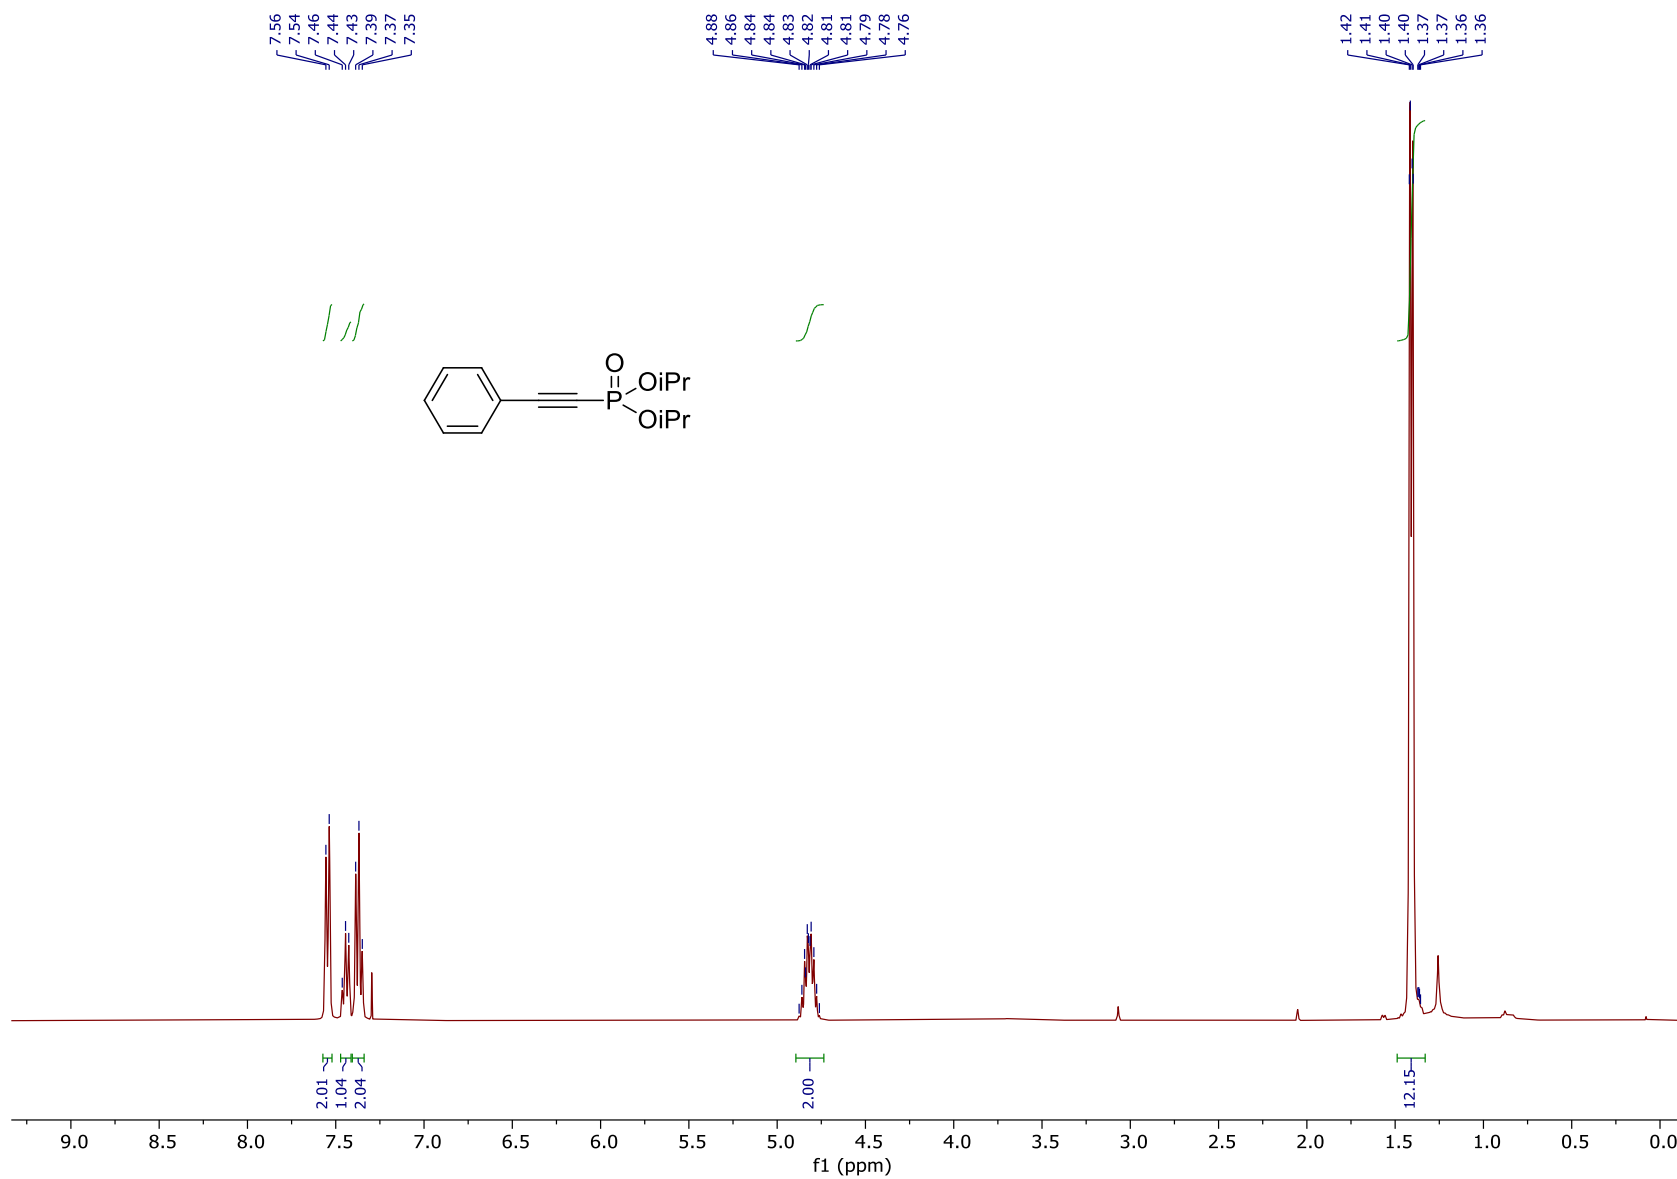

Figure S4: <sup>1</sup>H NMR Spectra of 3b

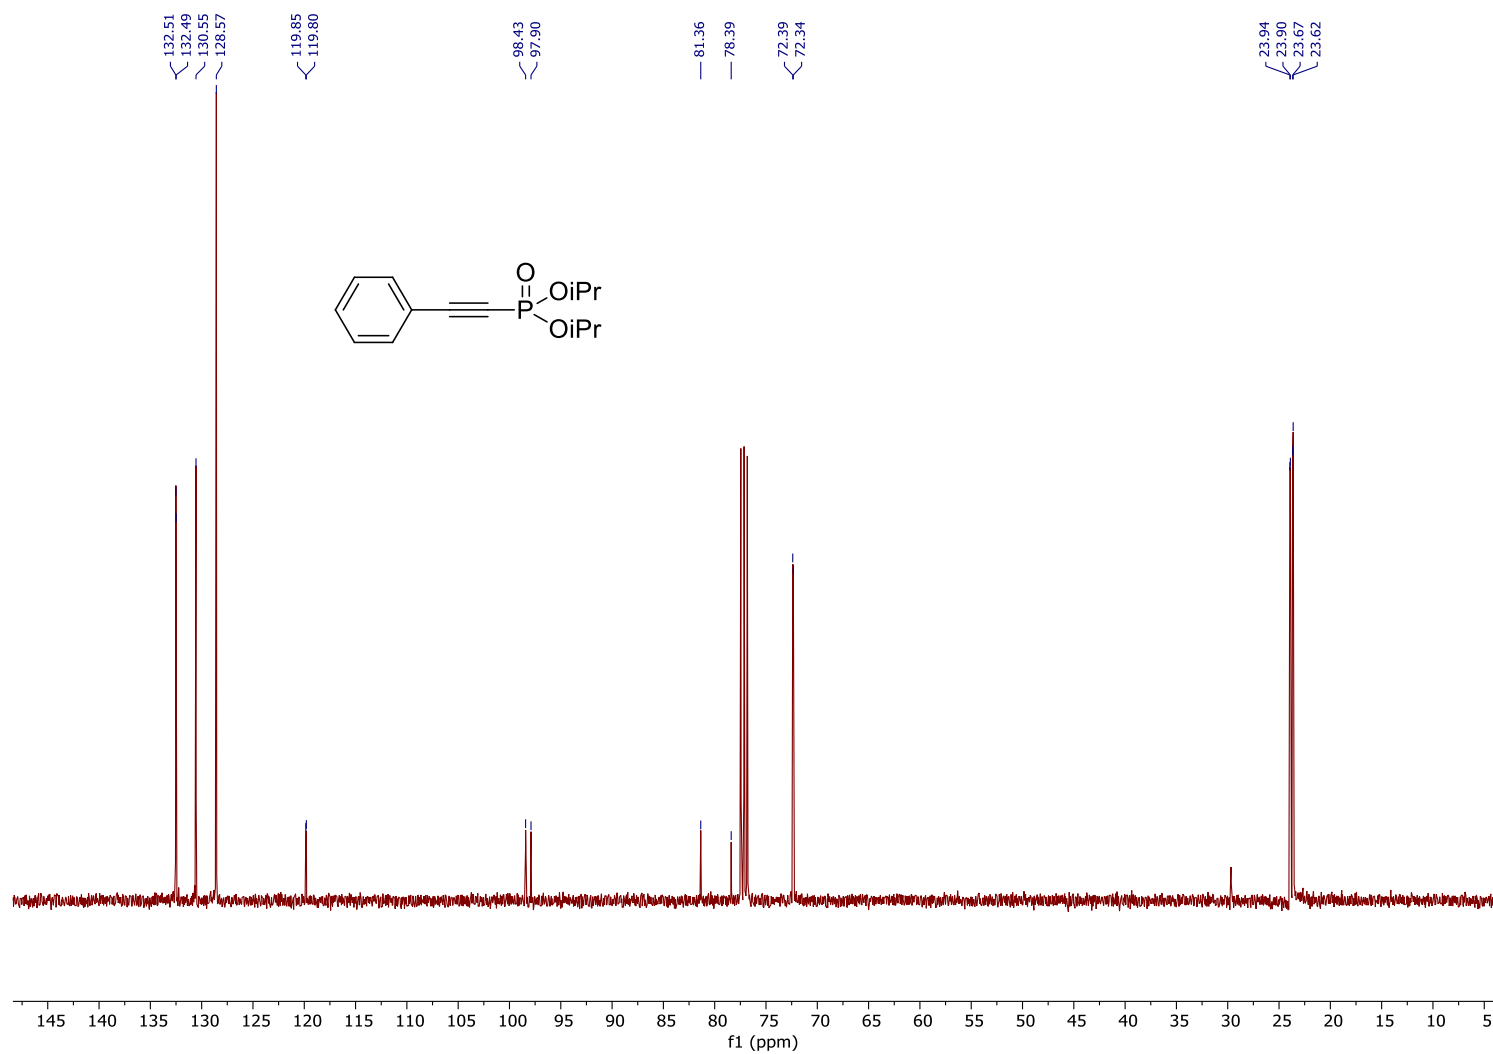

Figure S5:  $^{13}\text{C}$  NMR Spectra of 3b

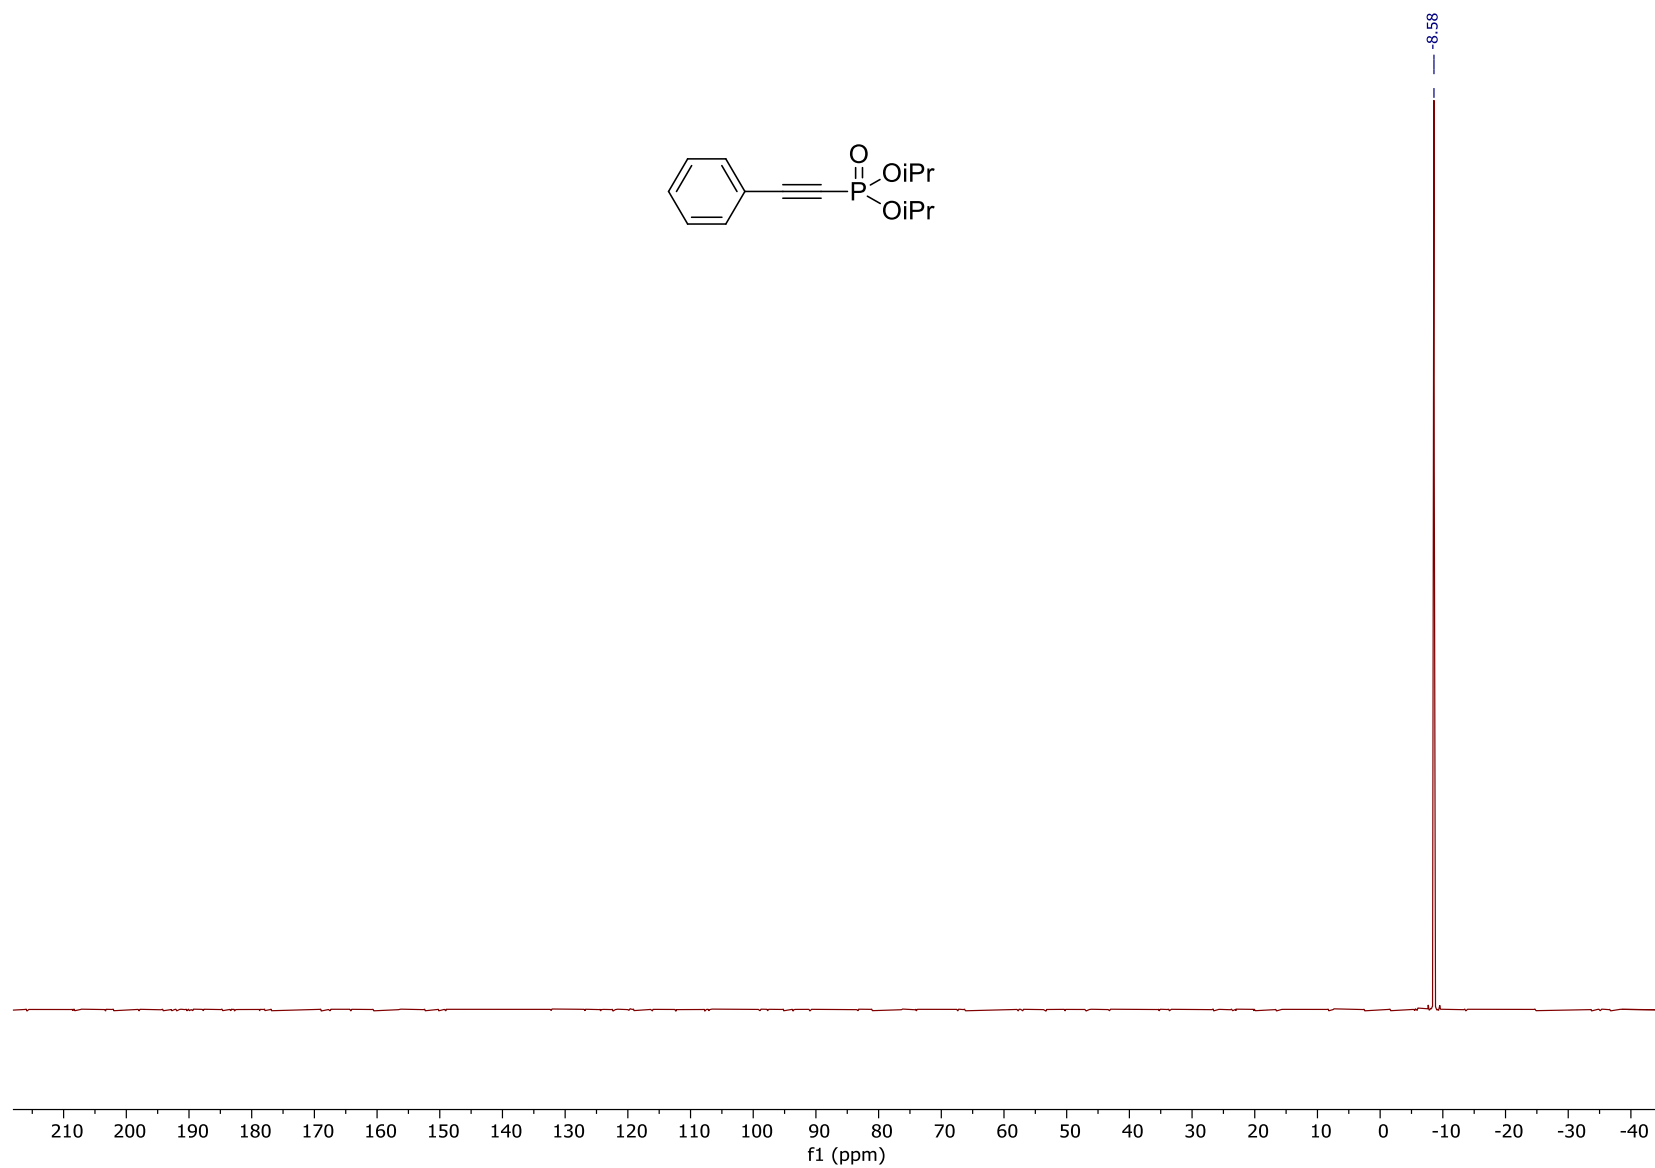

**Figure S6:**  $^{31}\text{P}$  NMR Spectra of **3b**

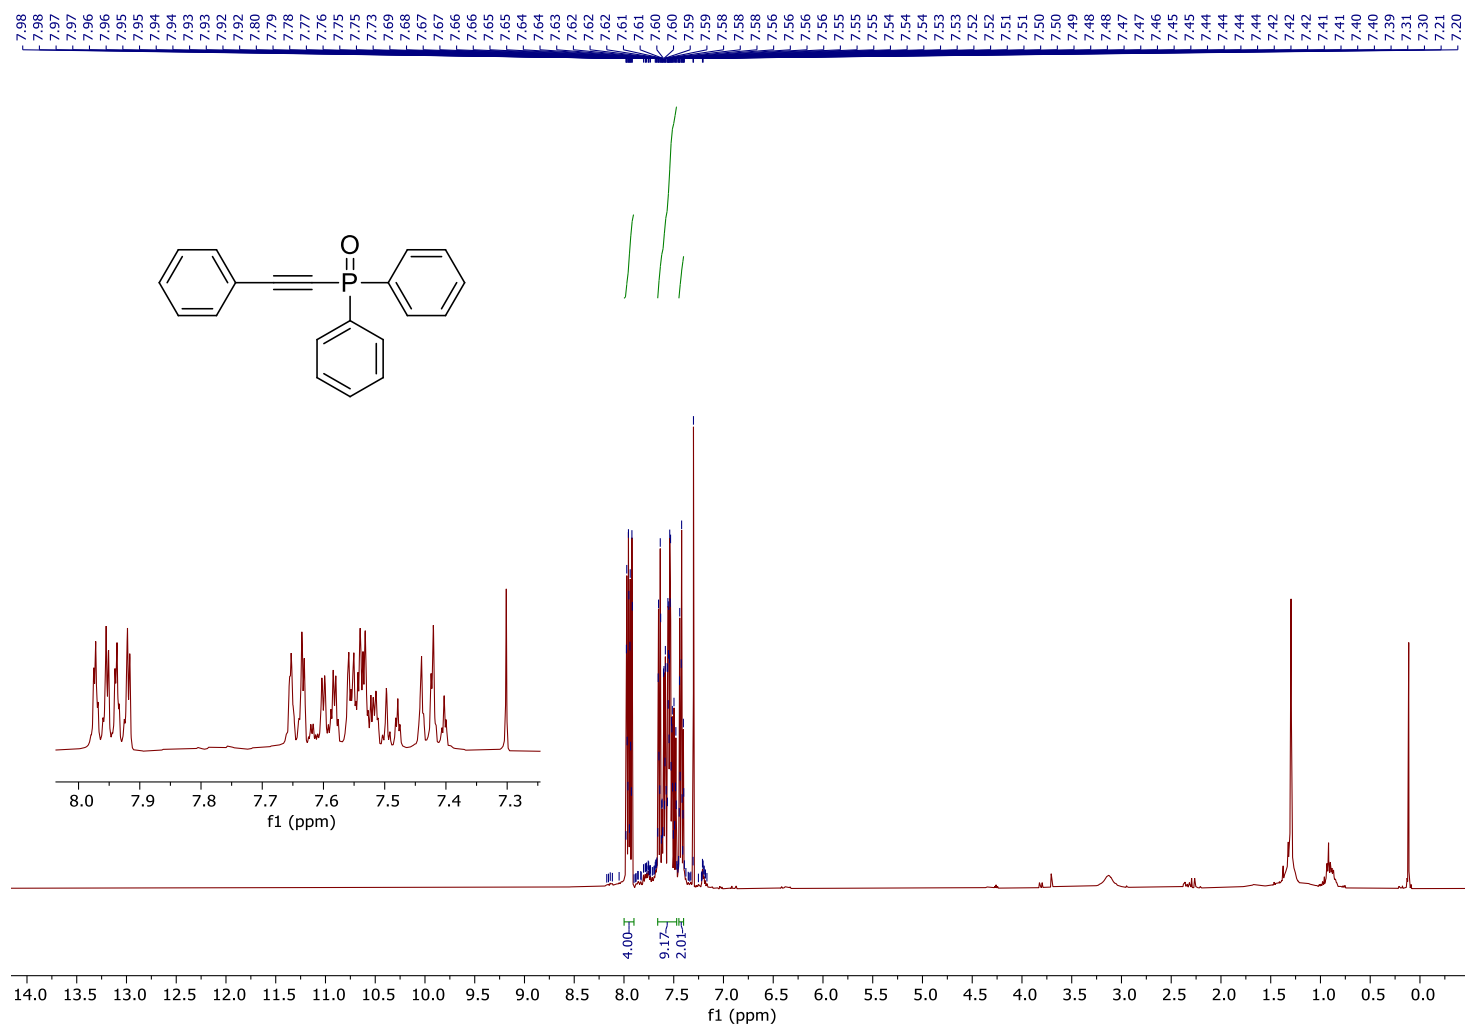

Figure S7:  $^1\text{H}$  NMR Spectra of **3c**

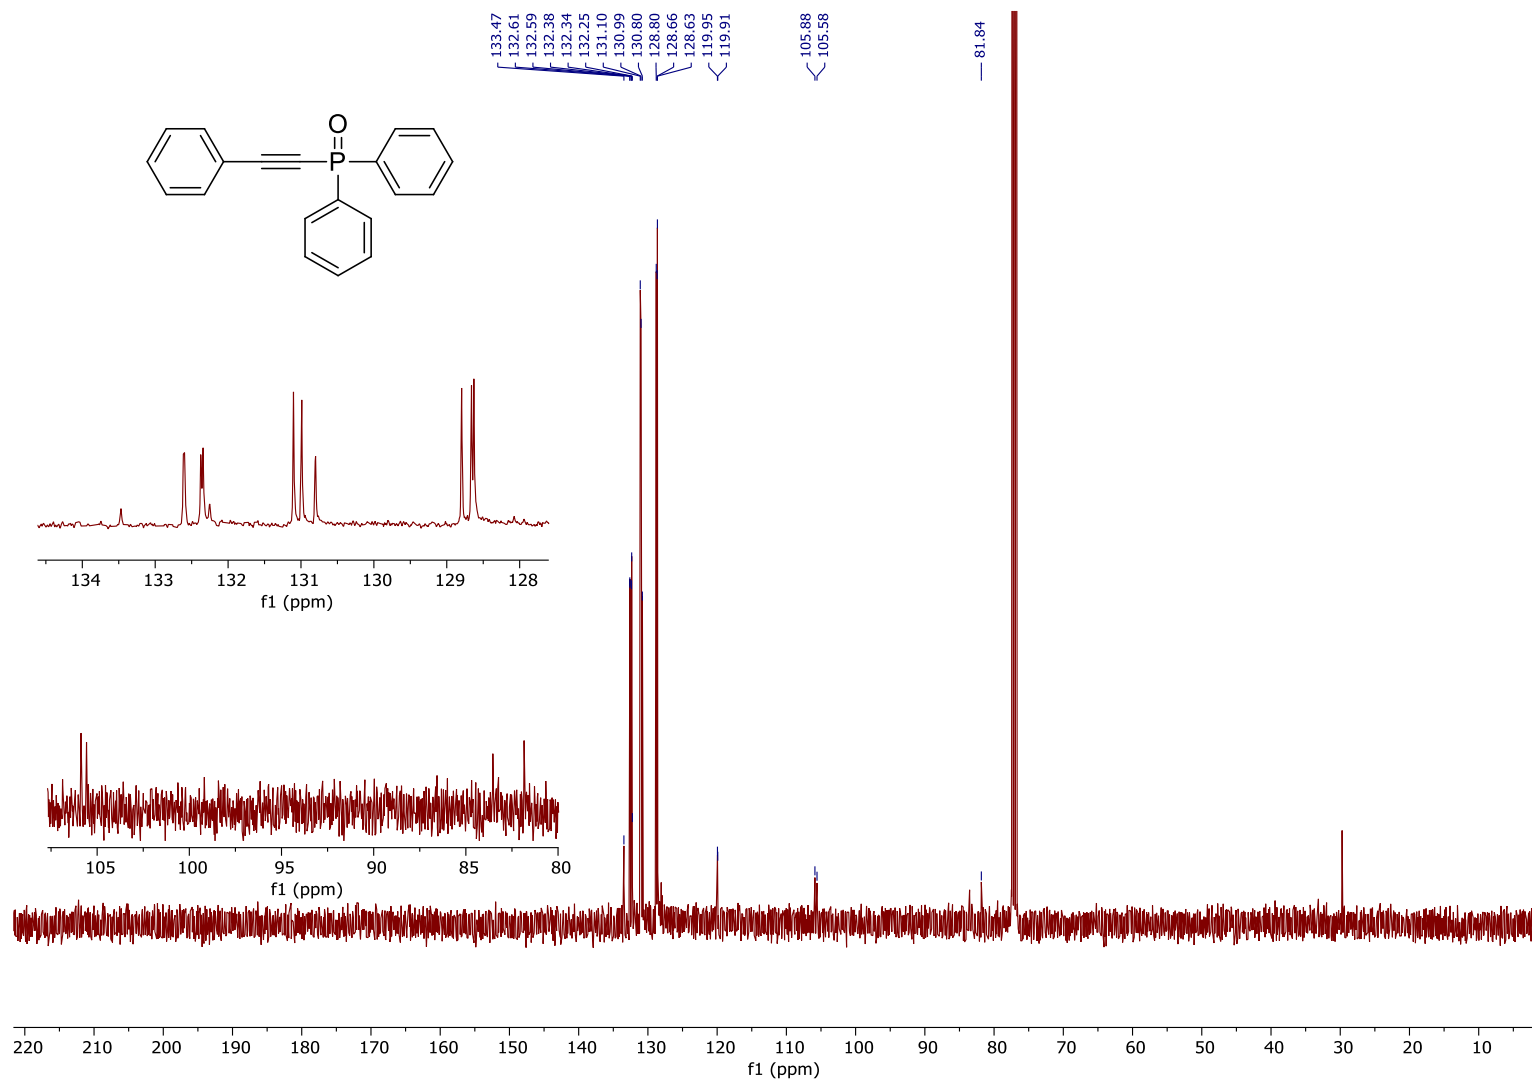

Figure S8:  $^{13}\text{C}$  NMR Spectra of 3c

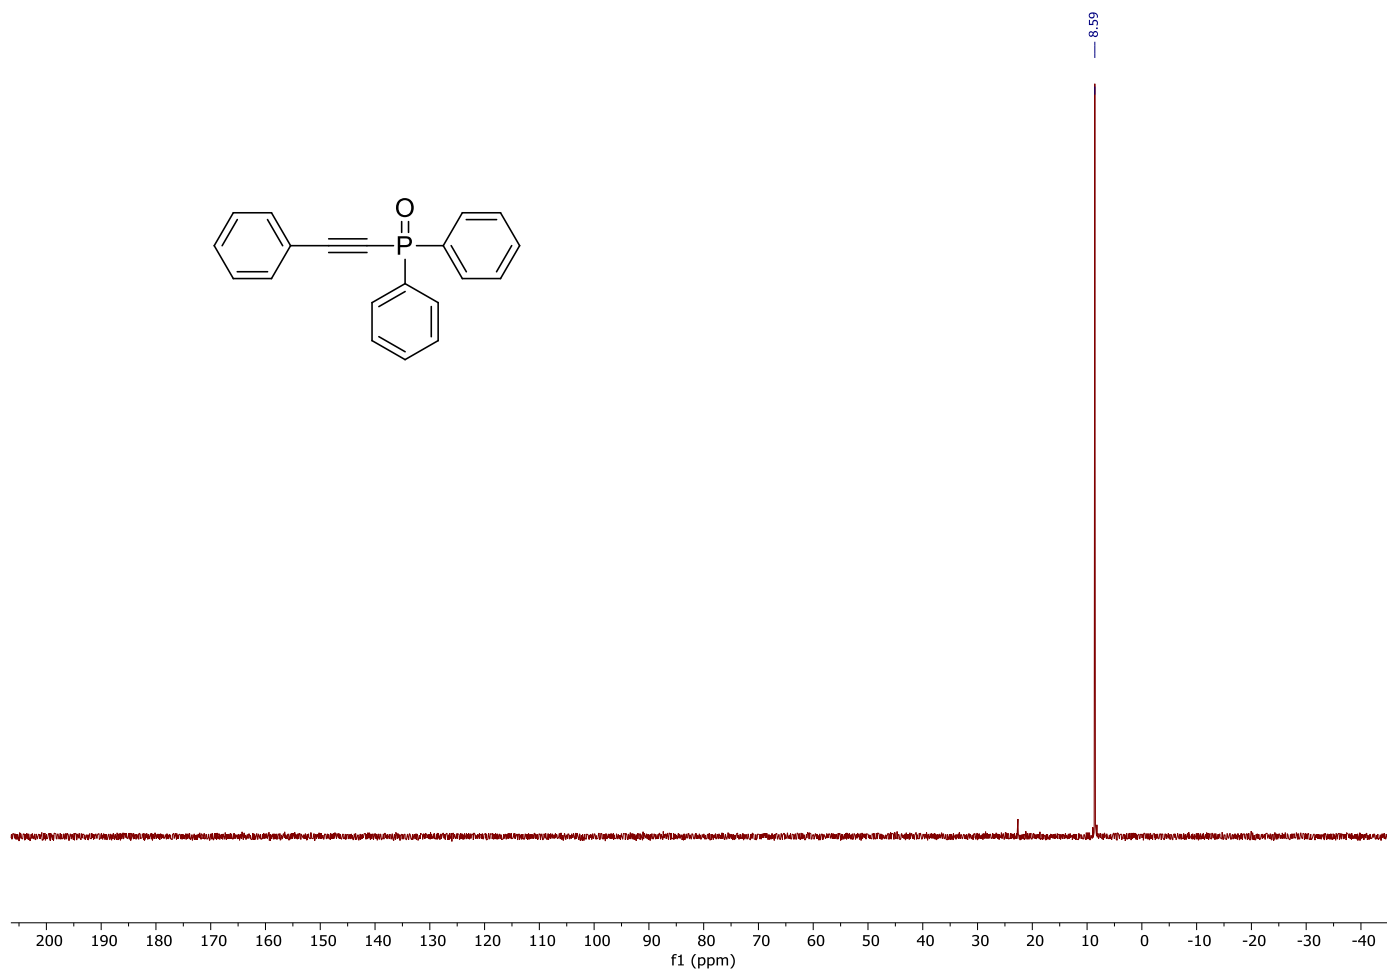

Figure S9:  $^{31}\text{P}$  NMR Spectra of 3c



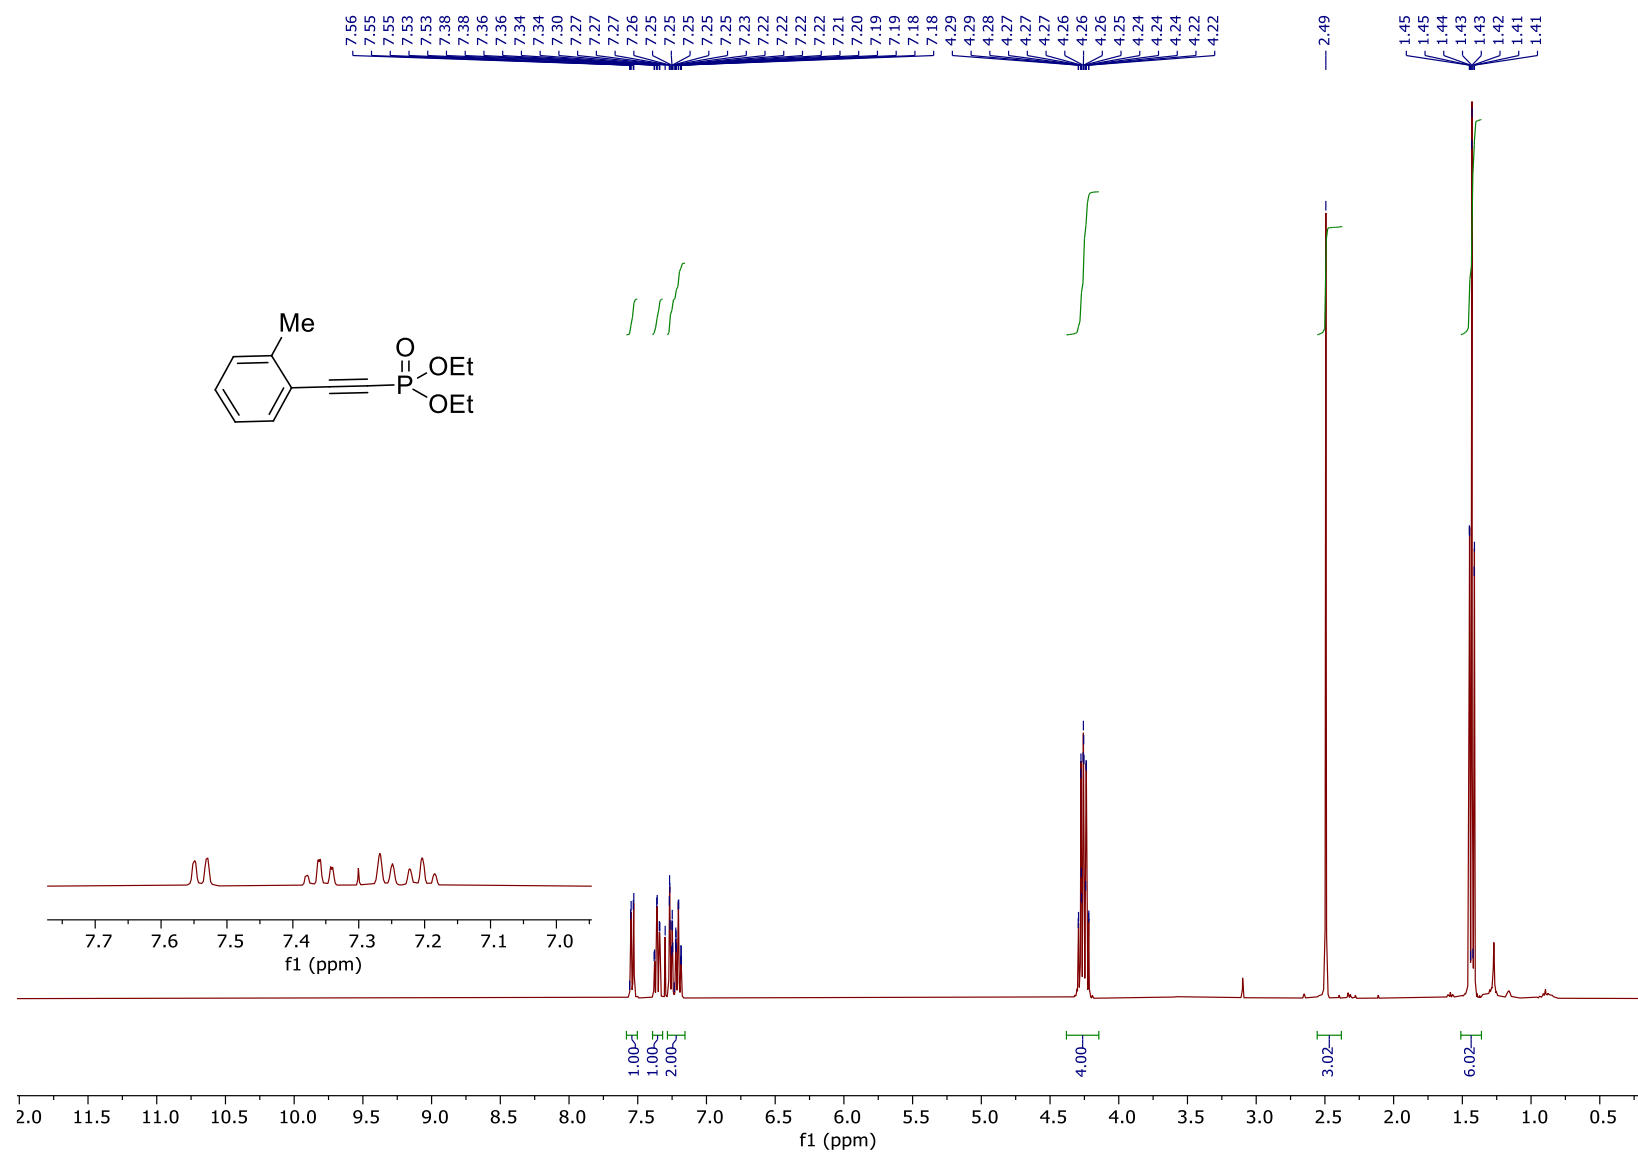

Figure S10: <sup>1</sup>H NMR Spectra of 3e

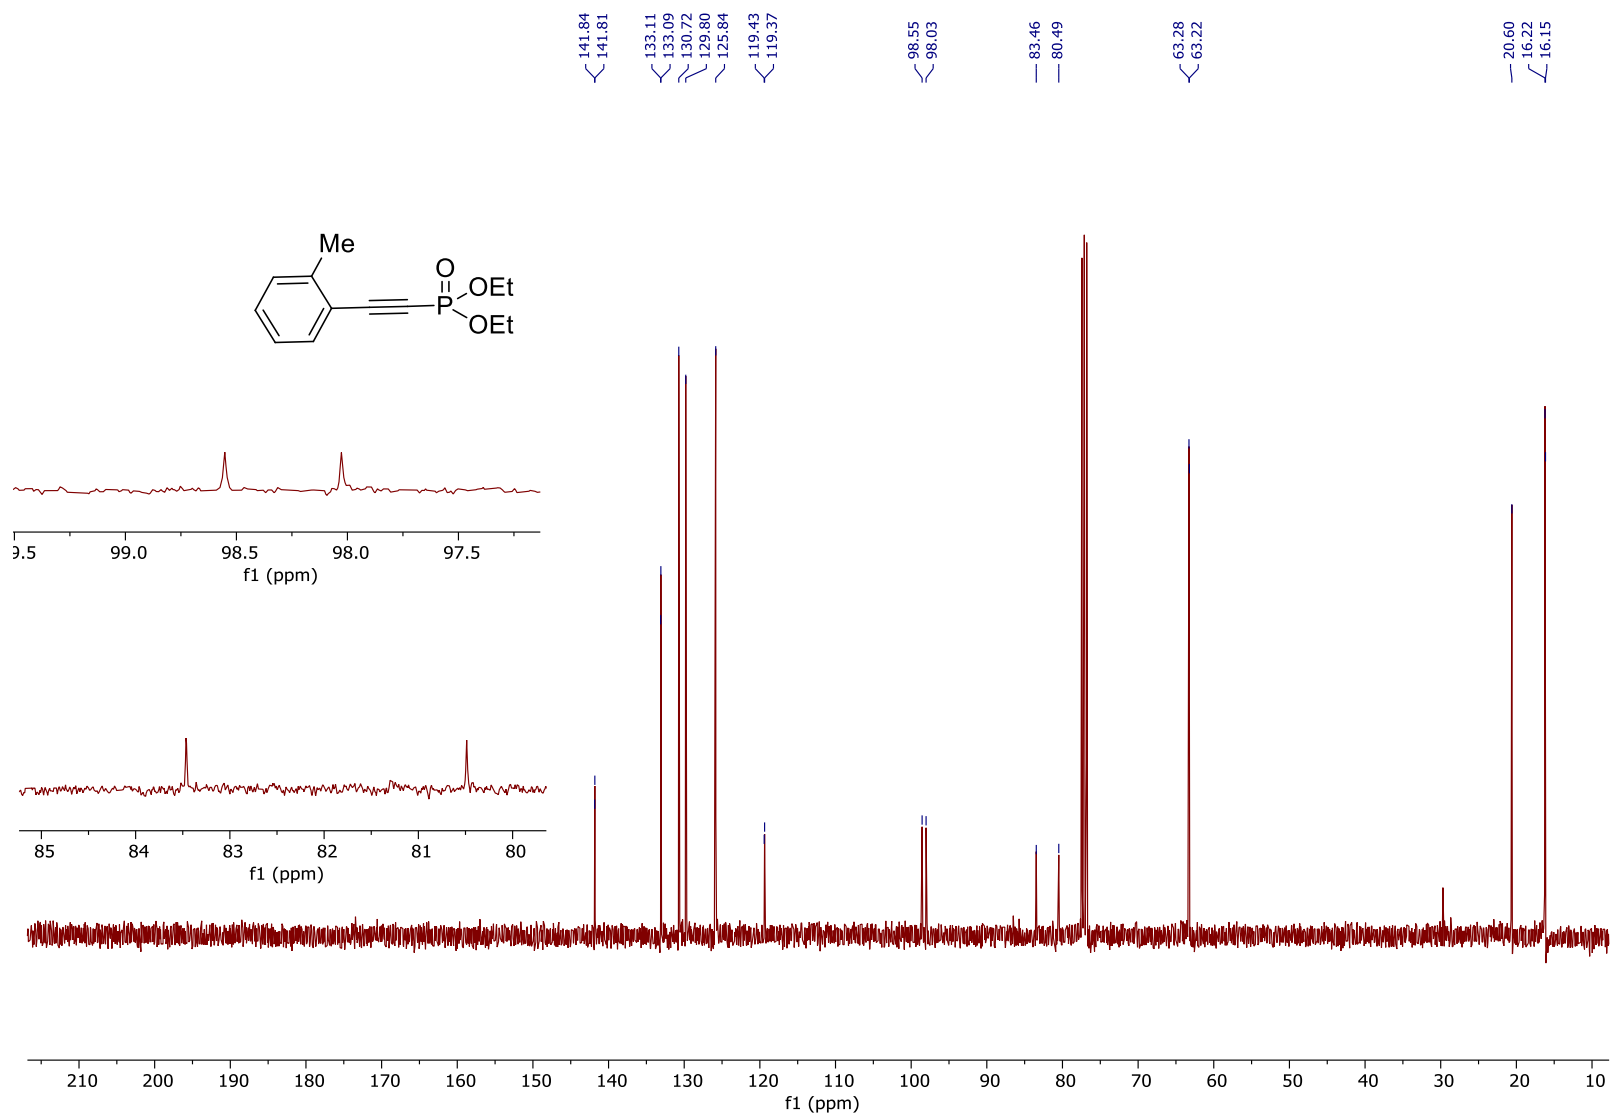

Figure S11: <sup>13</sup>C NMR Spectra of 3e

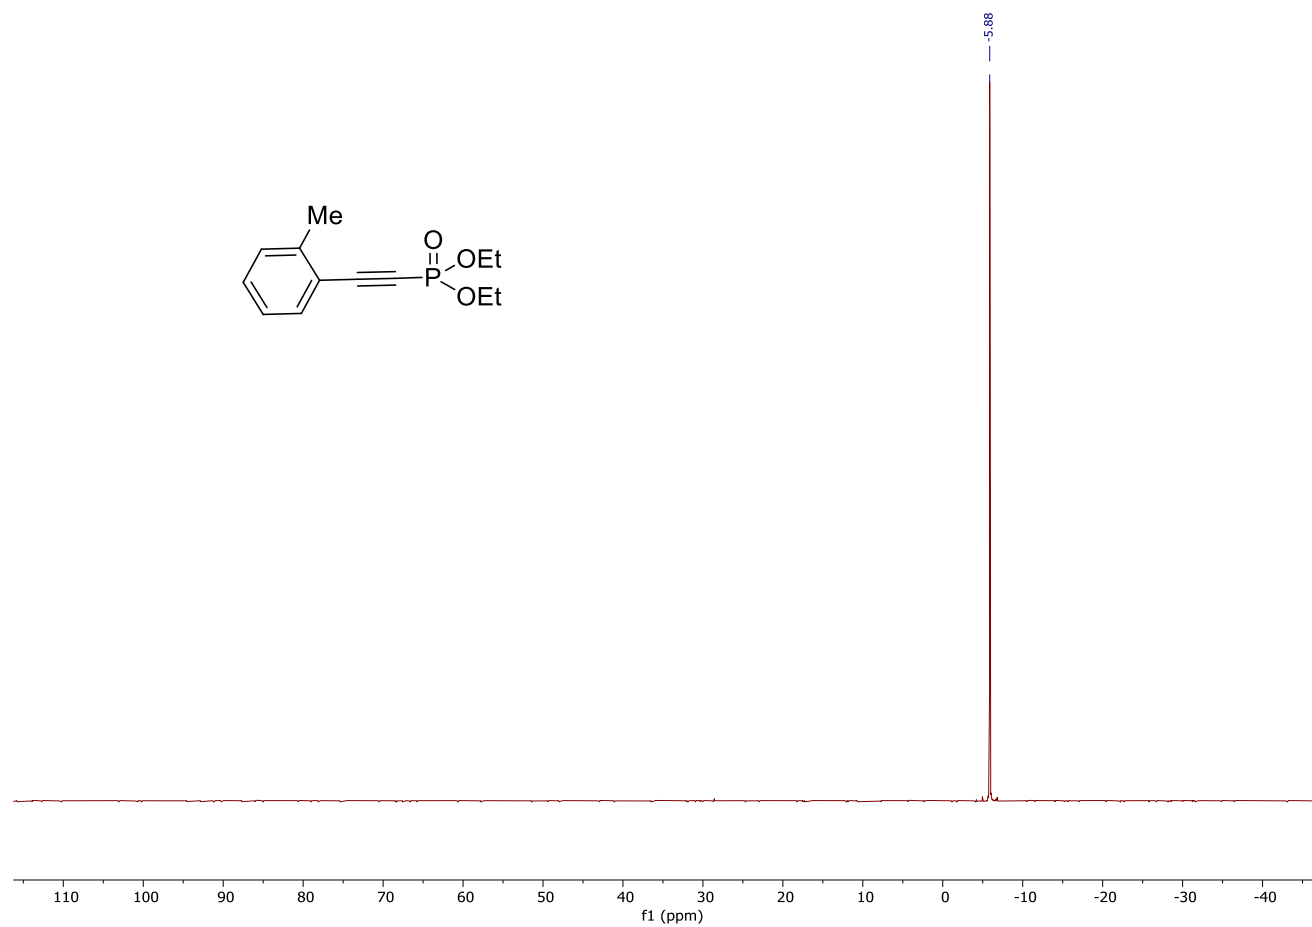

**Figure S12:  $^{31}\text{P}$  NMR Spectra of 3e**

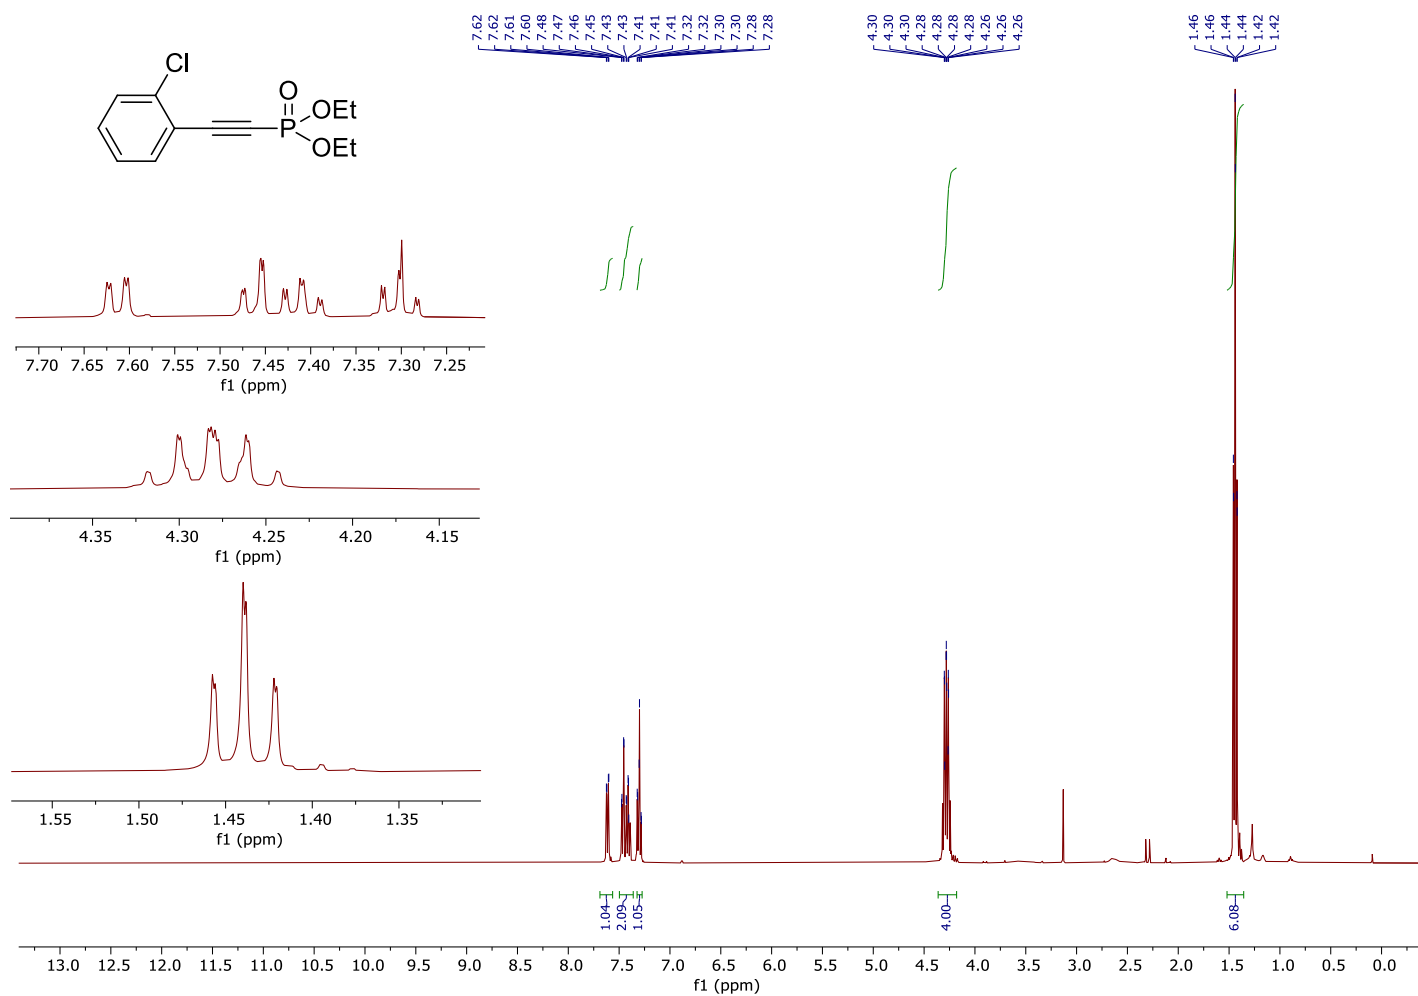

Figure S13:  $^1\text{H}$  NMR Spectra of 3f

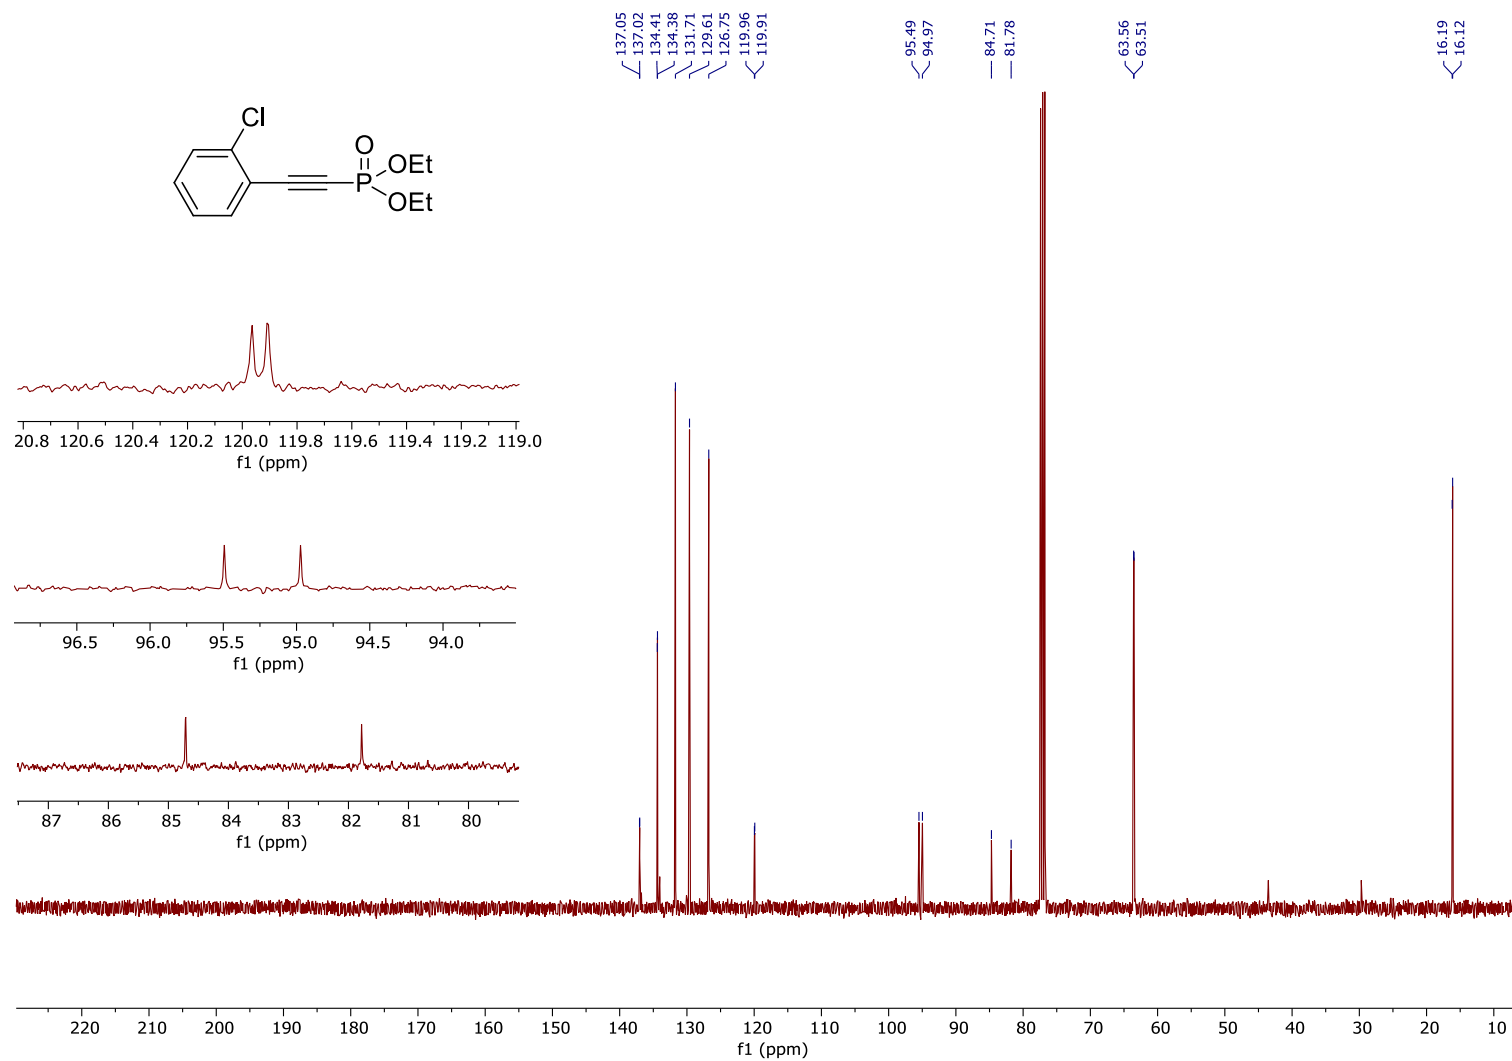

Figure S14: <sup>13</sup>C NMR Spectra of 3f

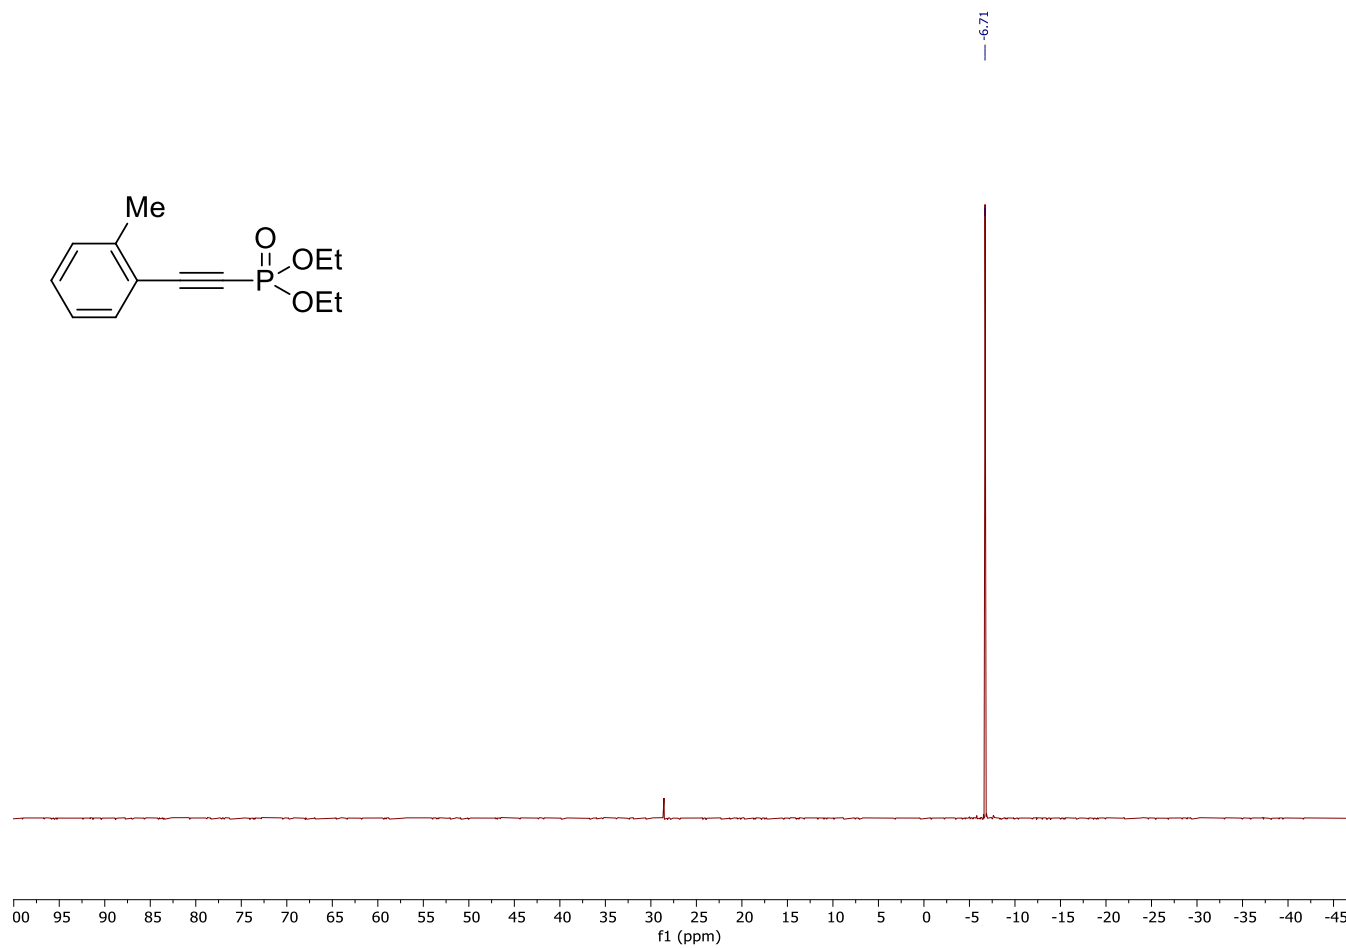

**Figure S15: <sup>31</sup>P NMR Spectra of 3f**

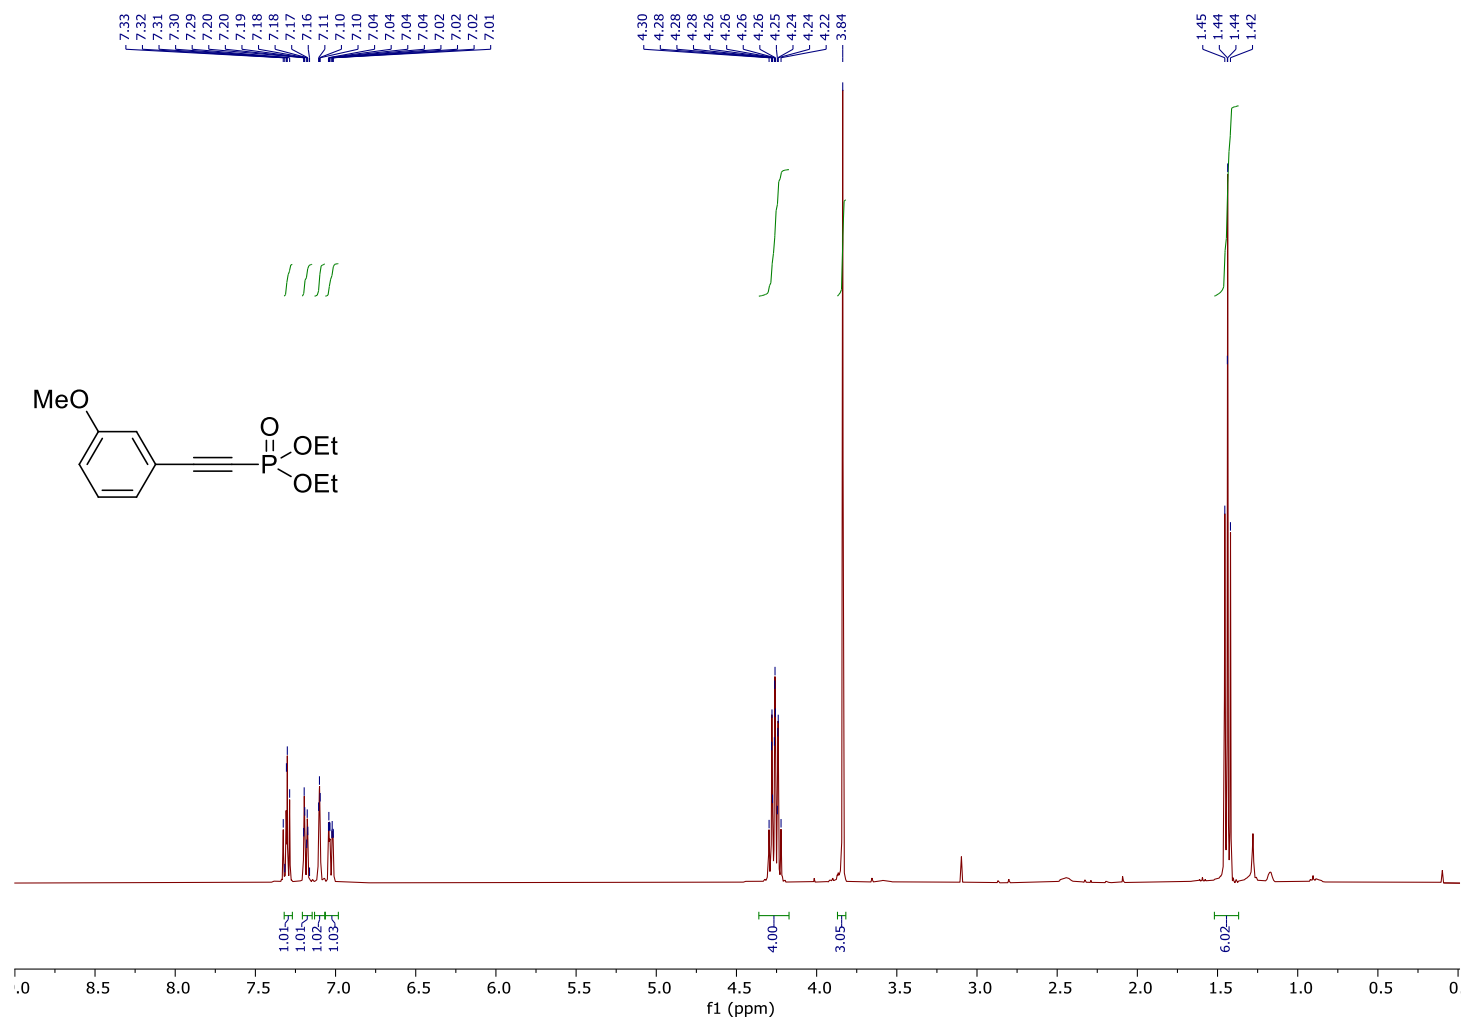

Figure S16: <sup>1</sup>H NMR Spectra of 3g

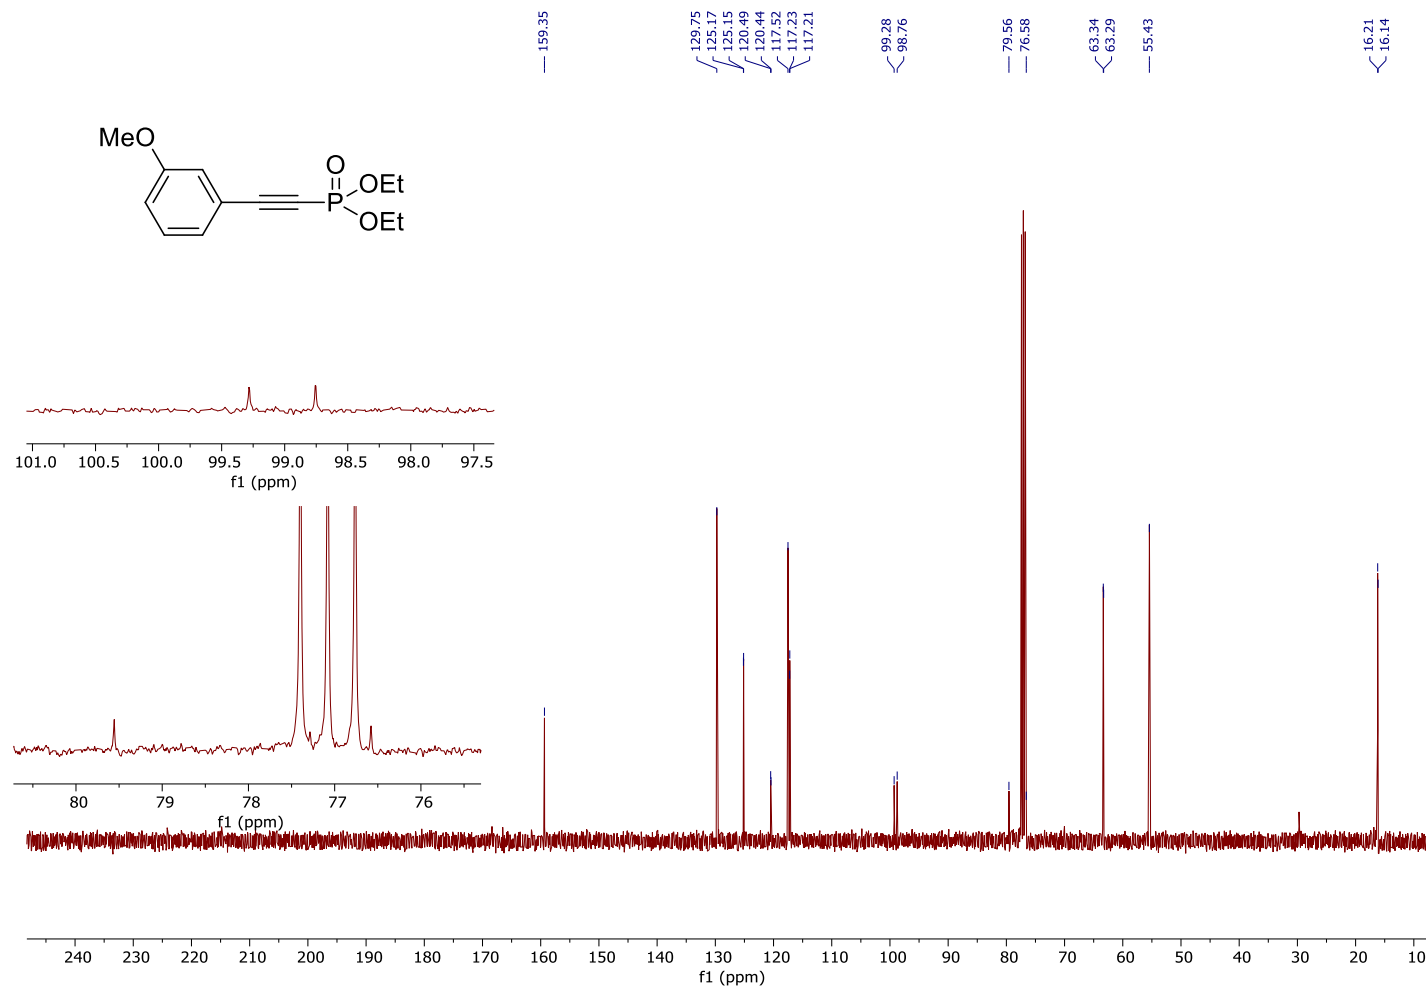

Figure S17: <sup>13</sup>C NMR Spectra of 3g



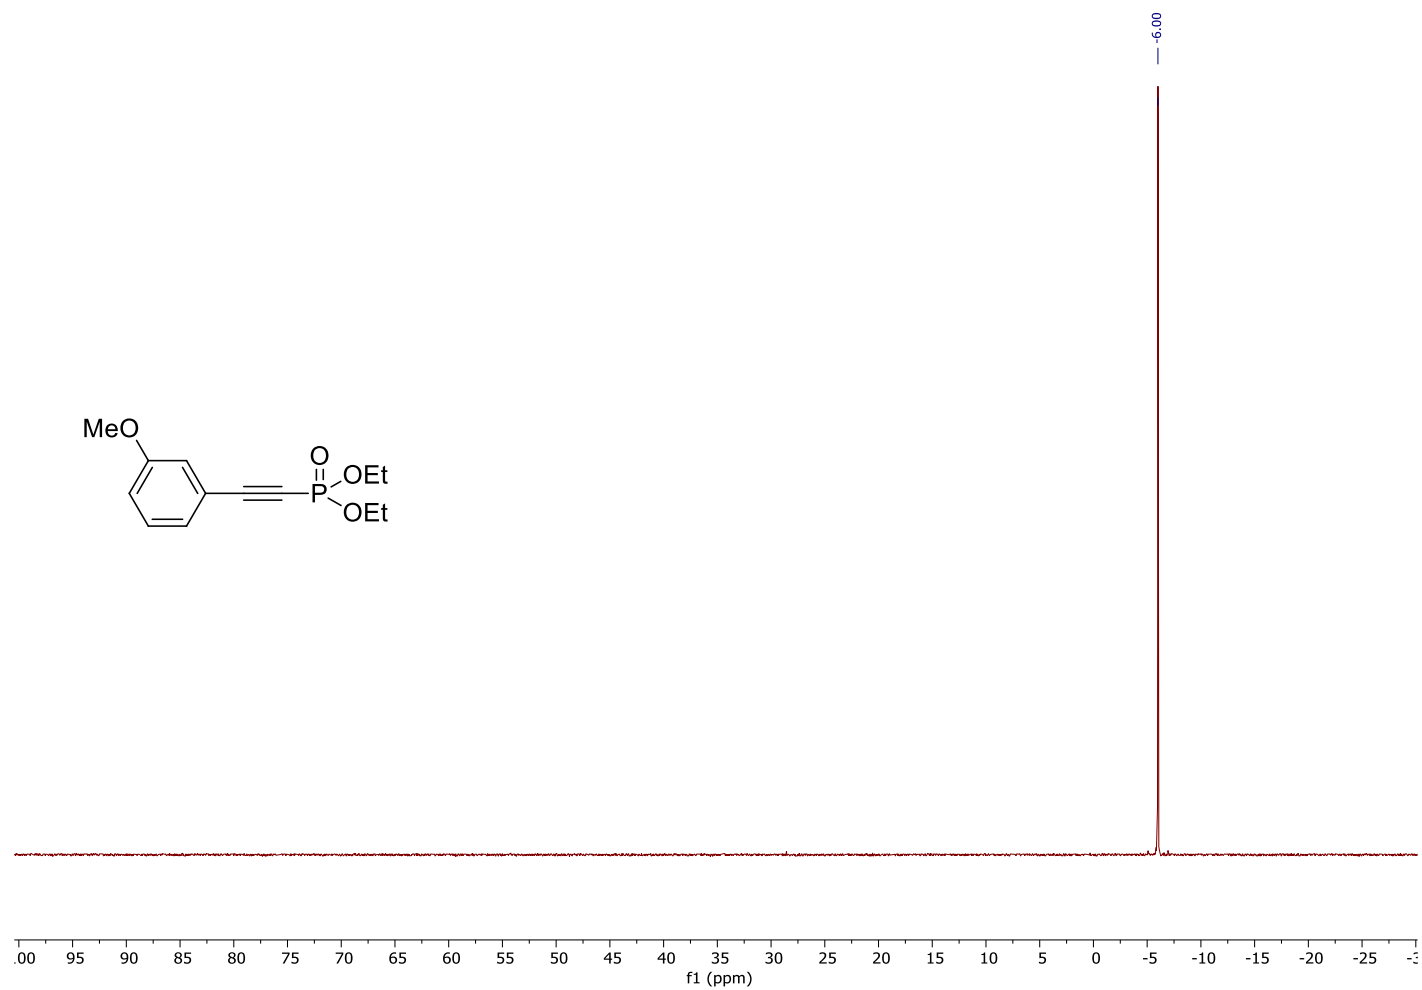

**Figure S18:**  $^{31}\text{P}$  NMR Spectra of 3g

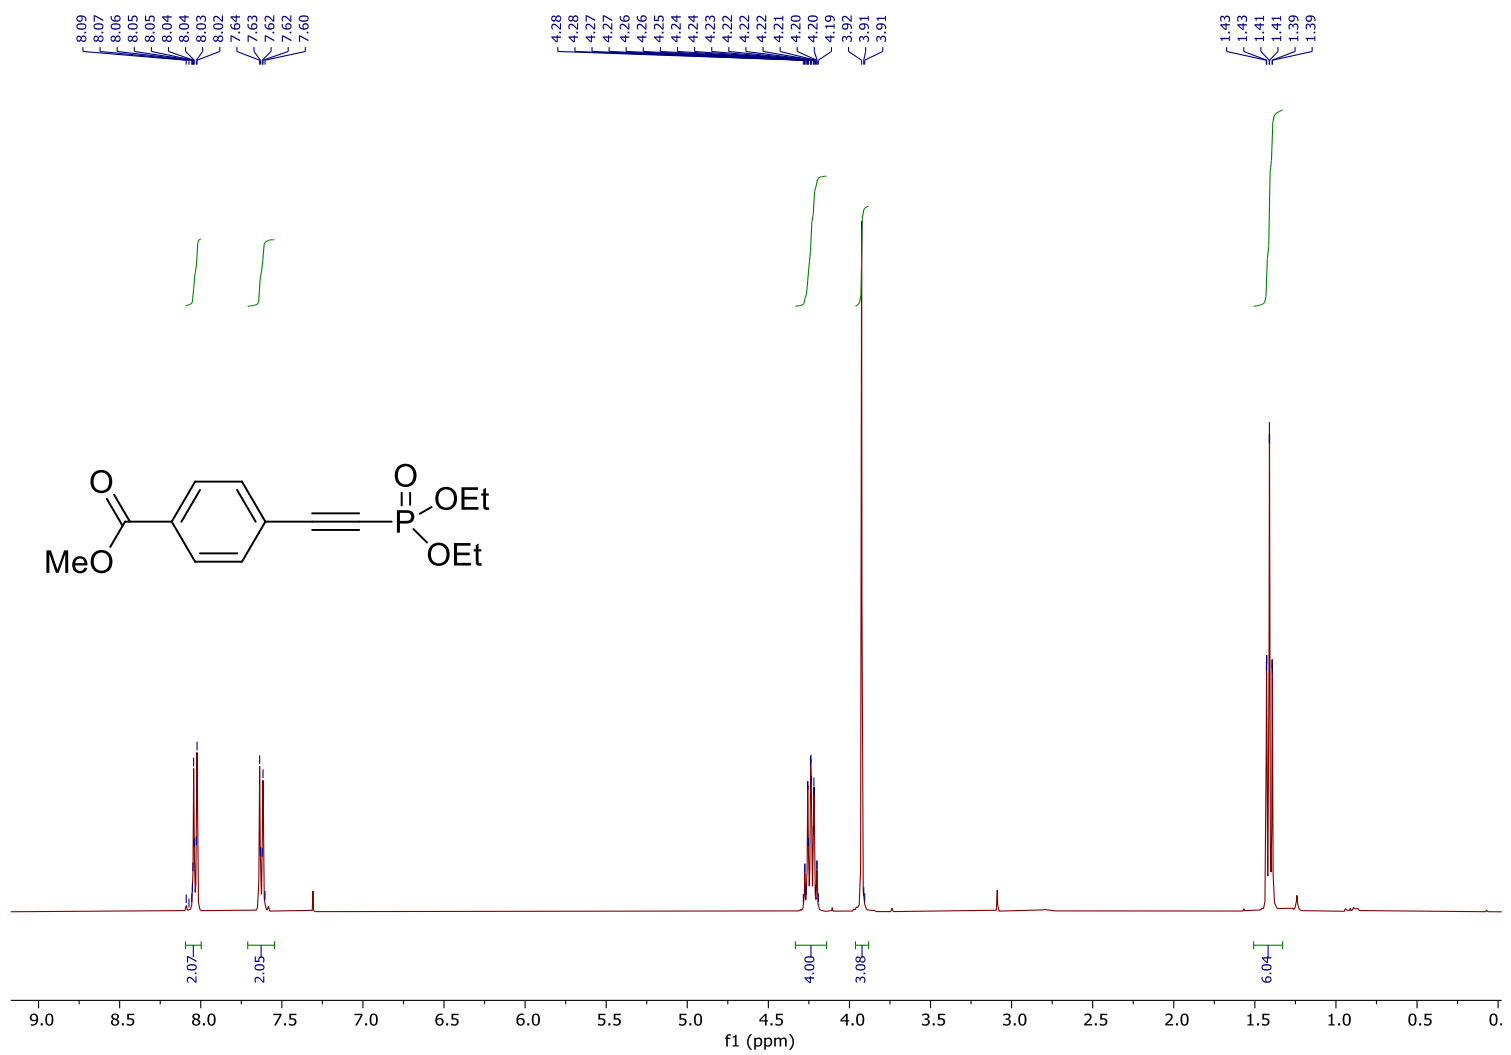

Figure S19: <sup>1</sup>H NMR Spectra of 3h

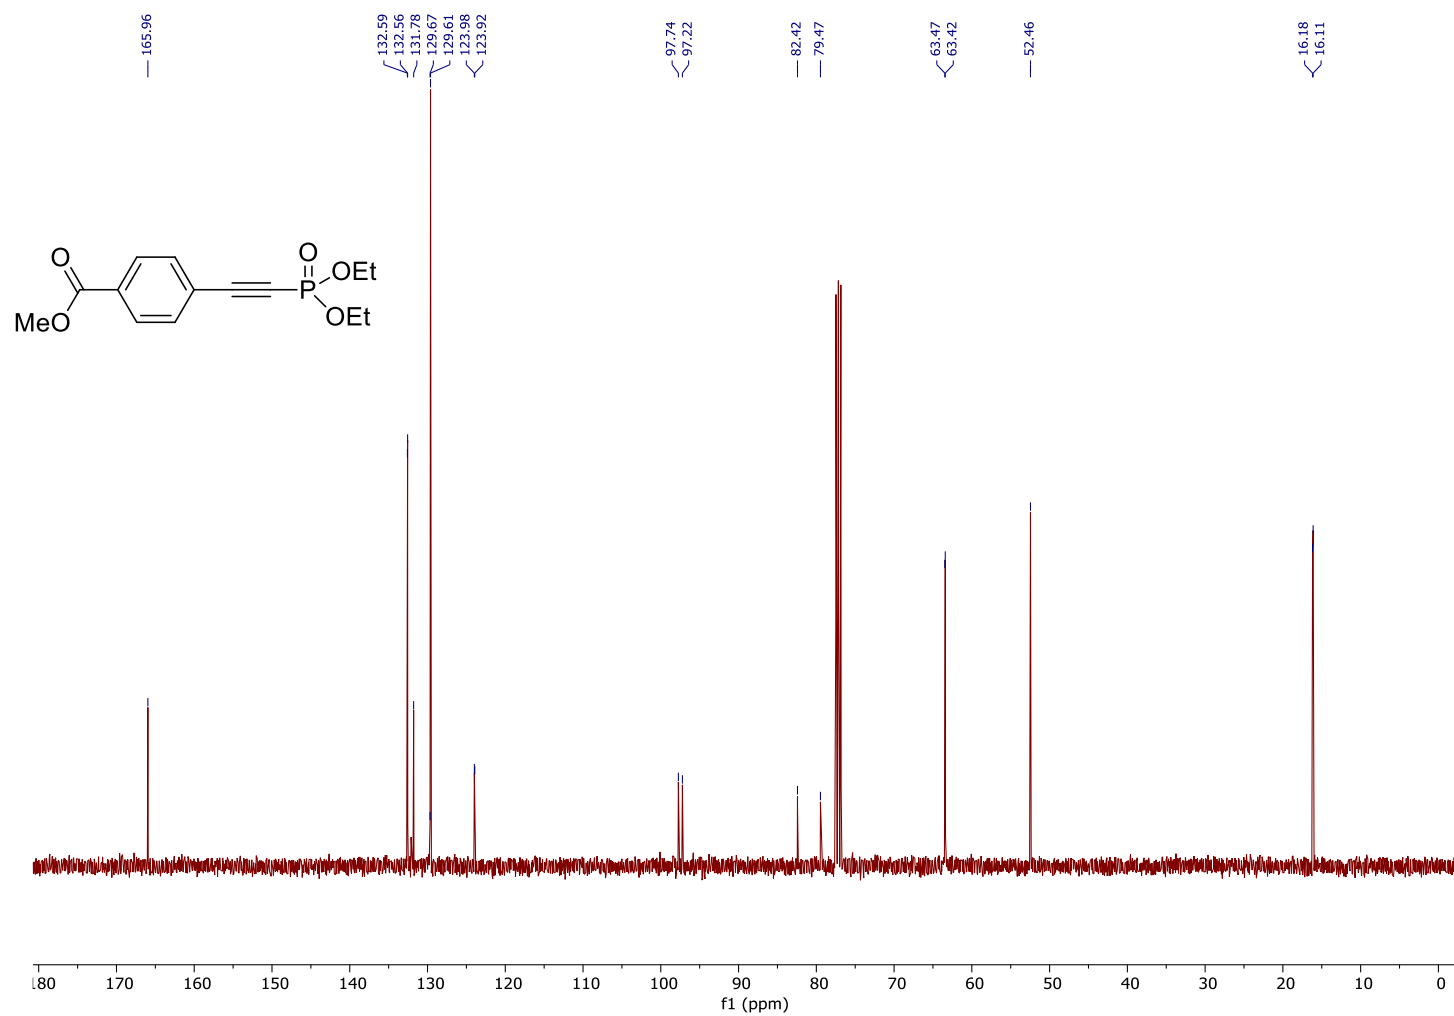

Figure S20:  $^{13}\text{C}$  NMR Spectra of 3h

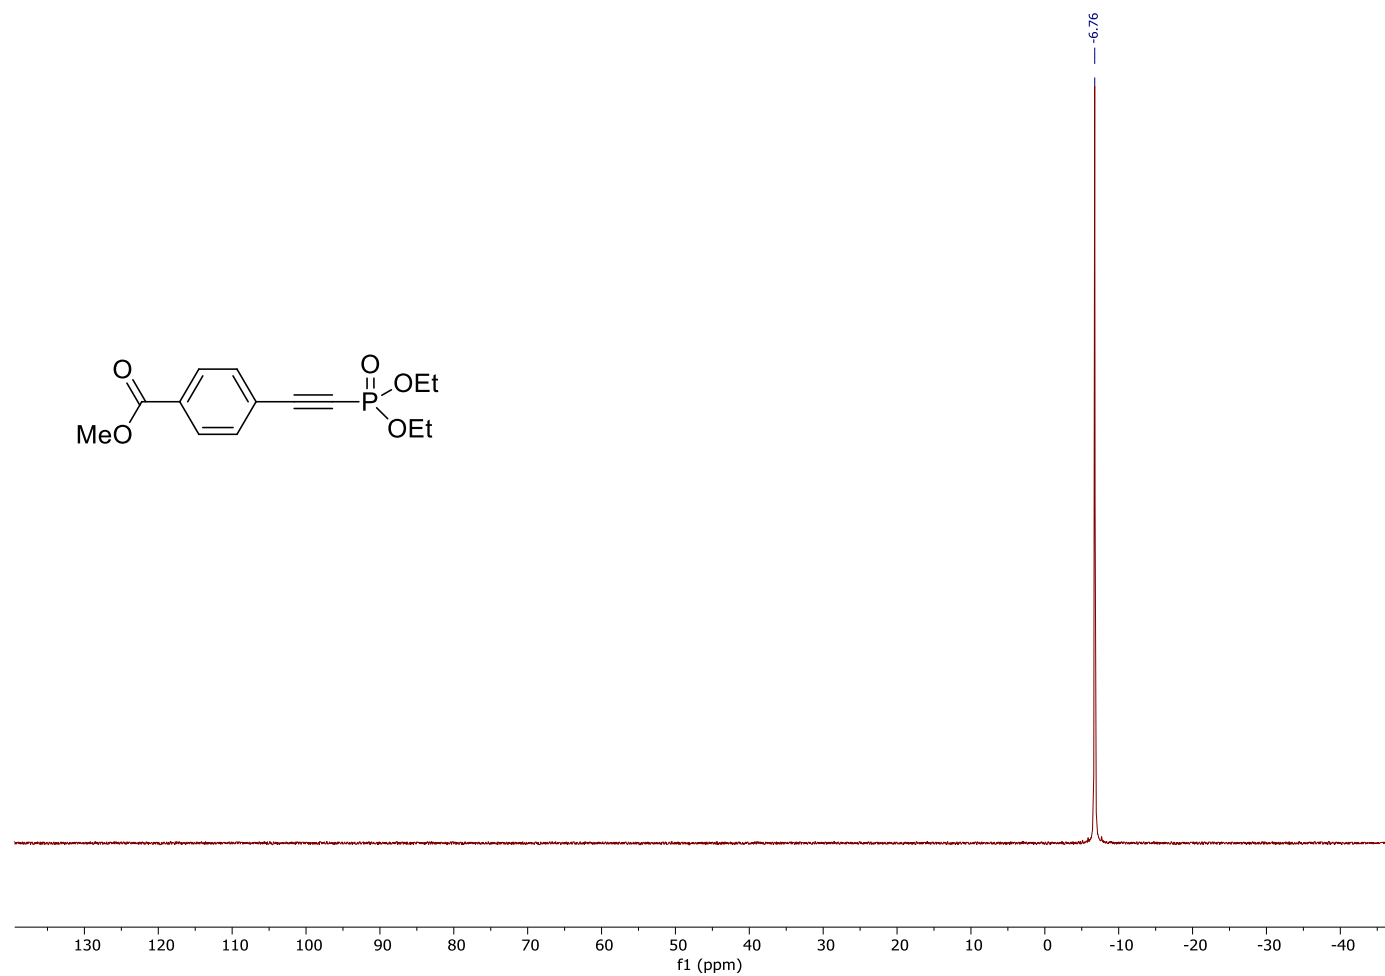

**Figure S21: <sup>31</sup>P NMR Spectra of 3h**

NMR.289.fid  
Sample Code:w2-08-21

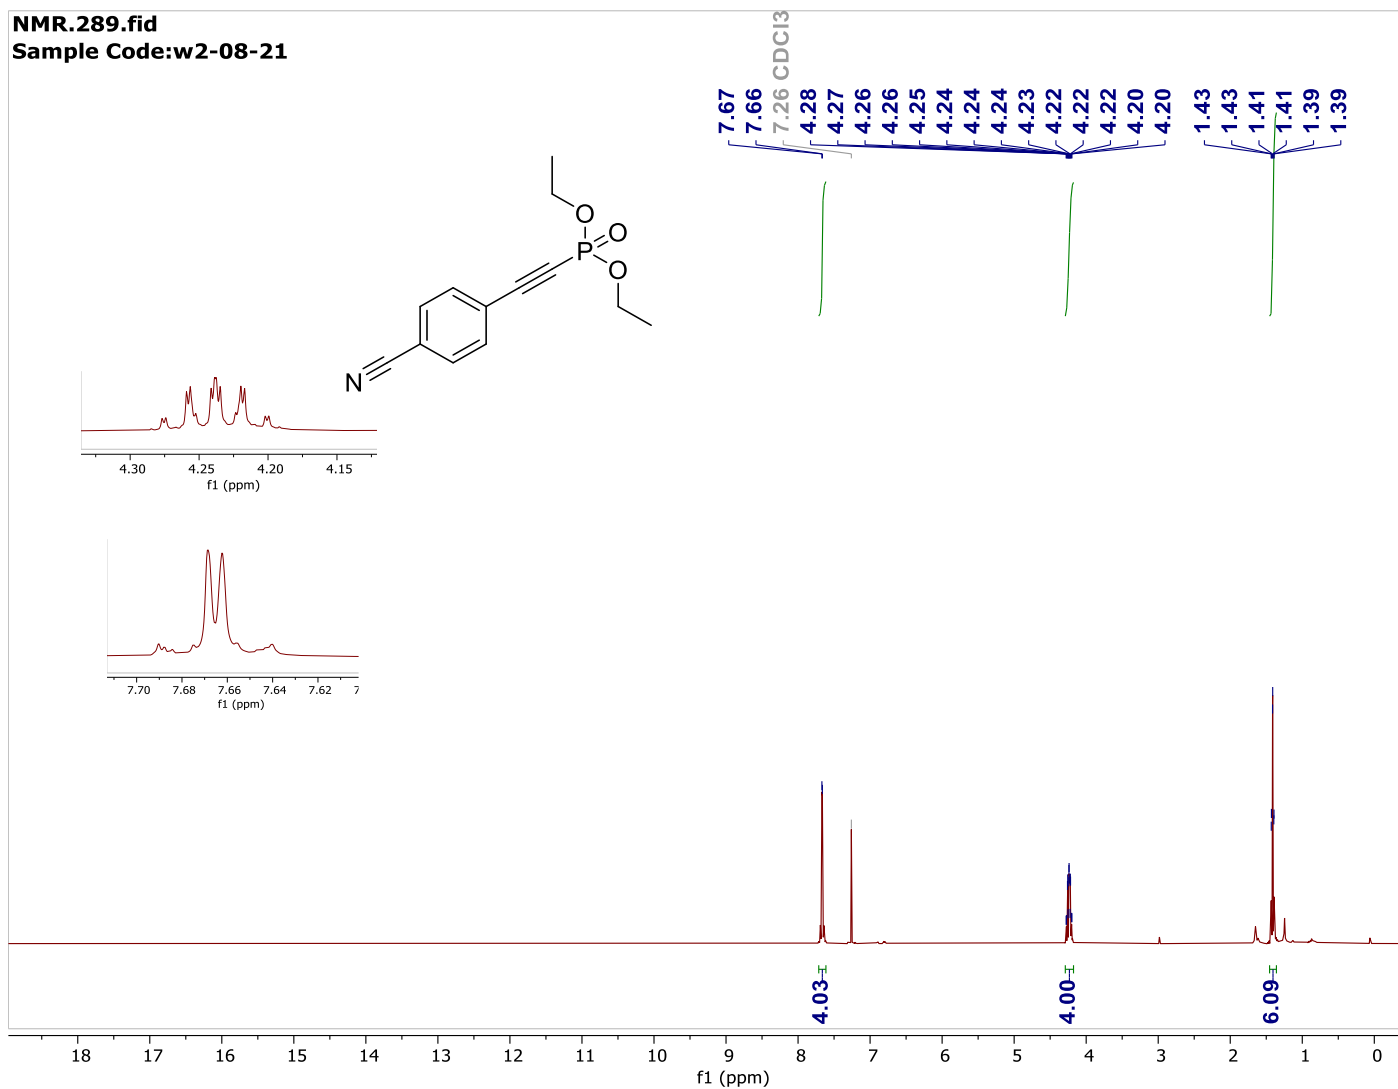

Figure S22: <sup>1</sup>H NMR Spectra of 3i

NMR/281.W2.C  
Sample Code:W9-03.08.

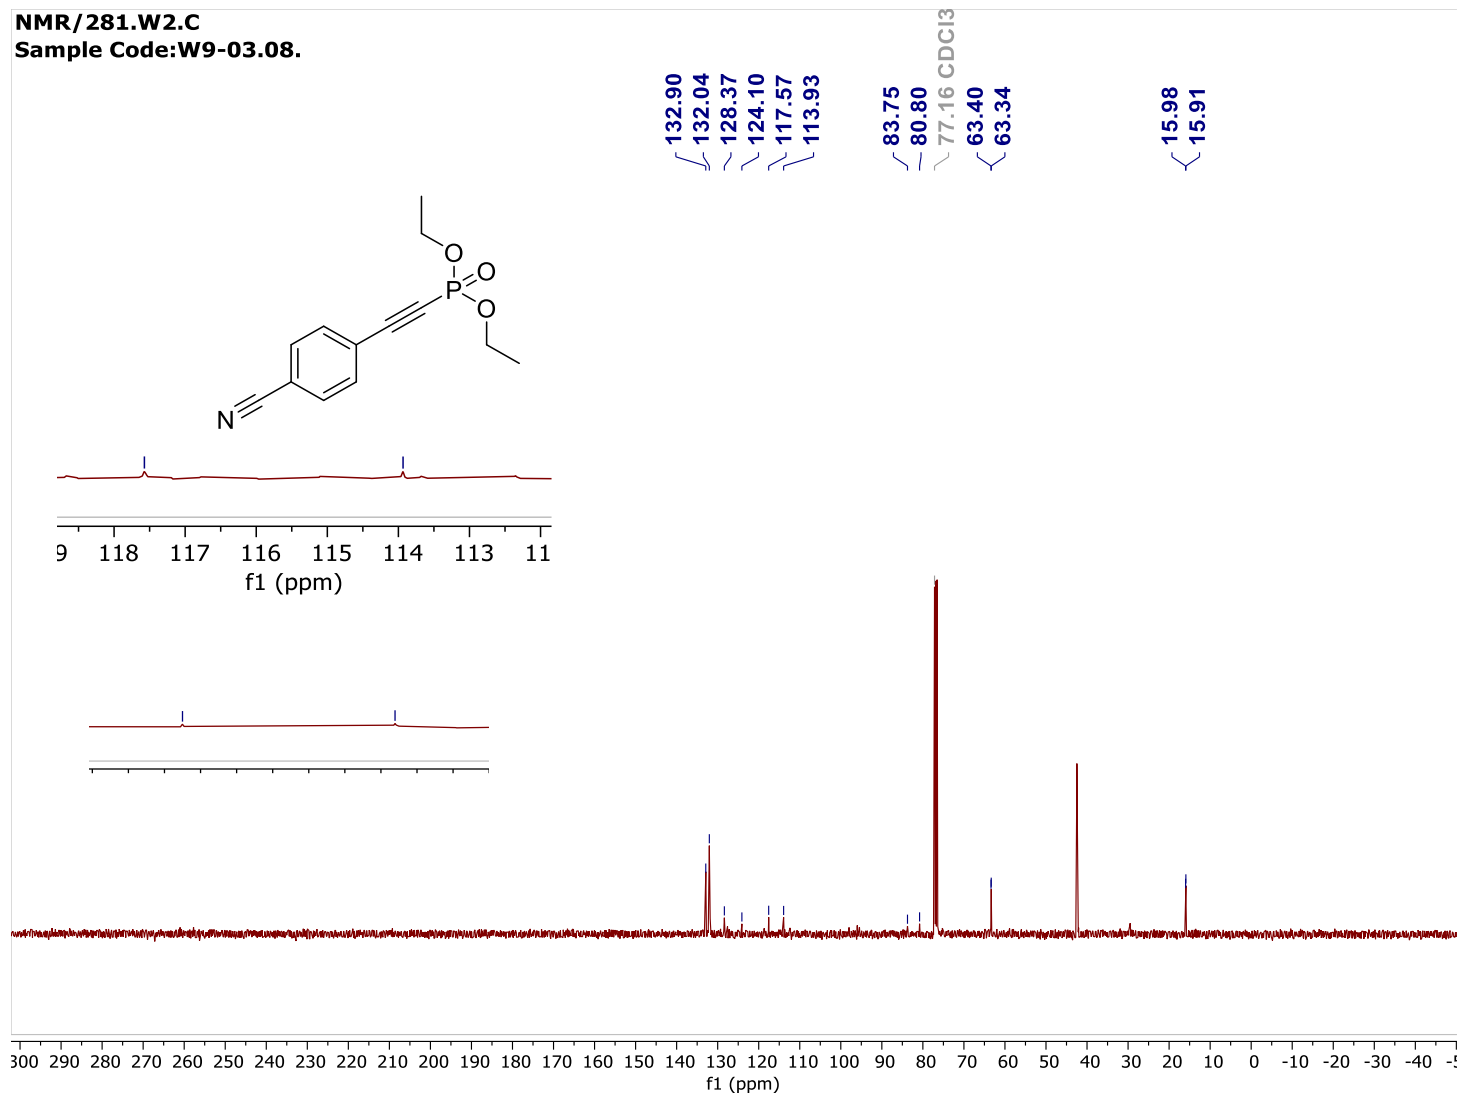

Figure S23: <sup>13</sup>C NMR Spectra of 3i

**NMR/280.W2.P**  
**Sample Code:W9-03.08.**

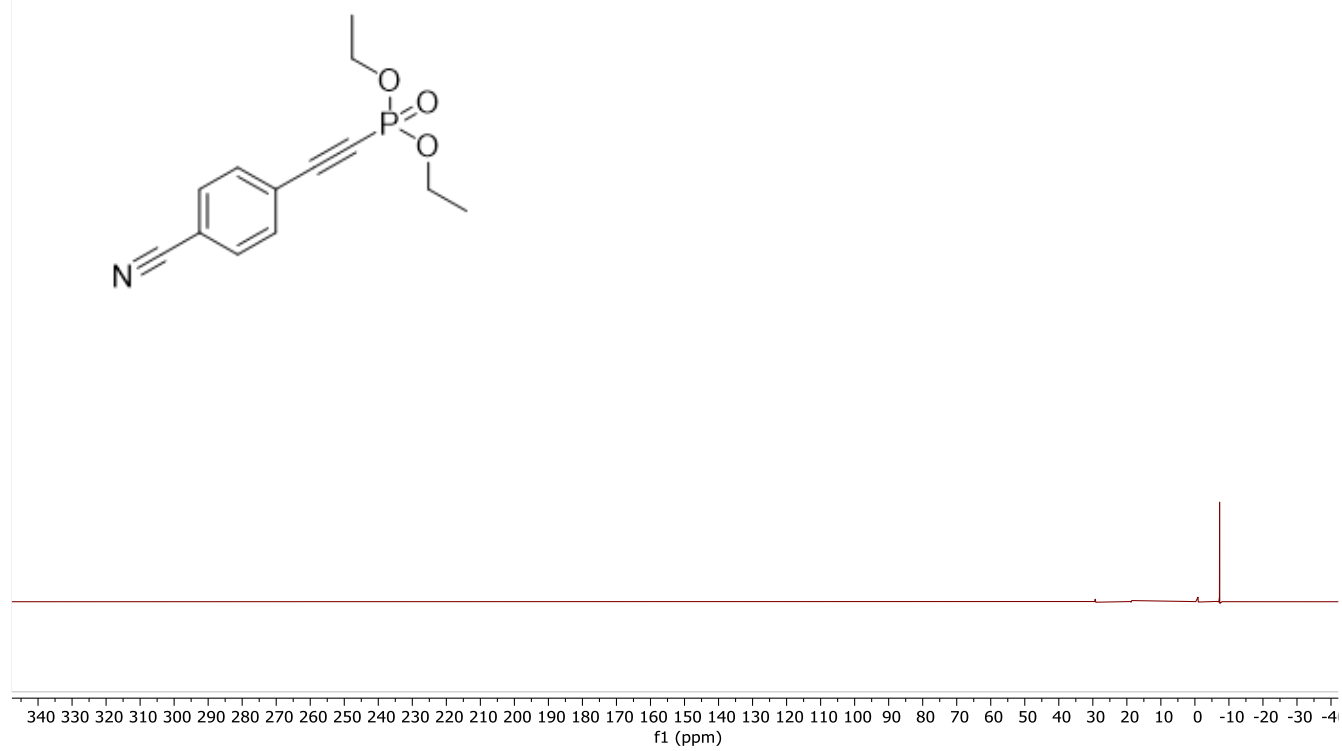

**Figure S24:  $^{31}\text{P}$  NMR Spectra of 3i**

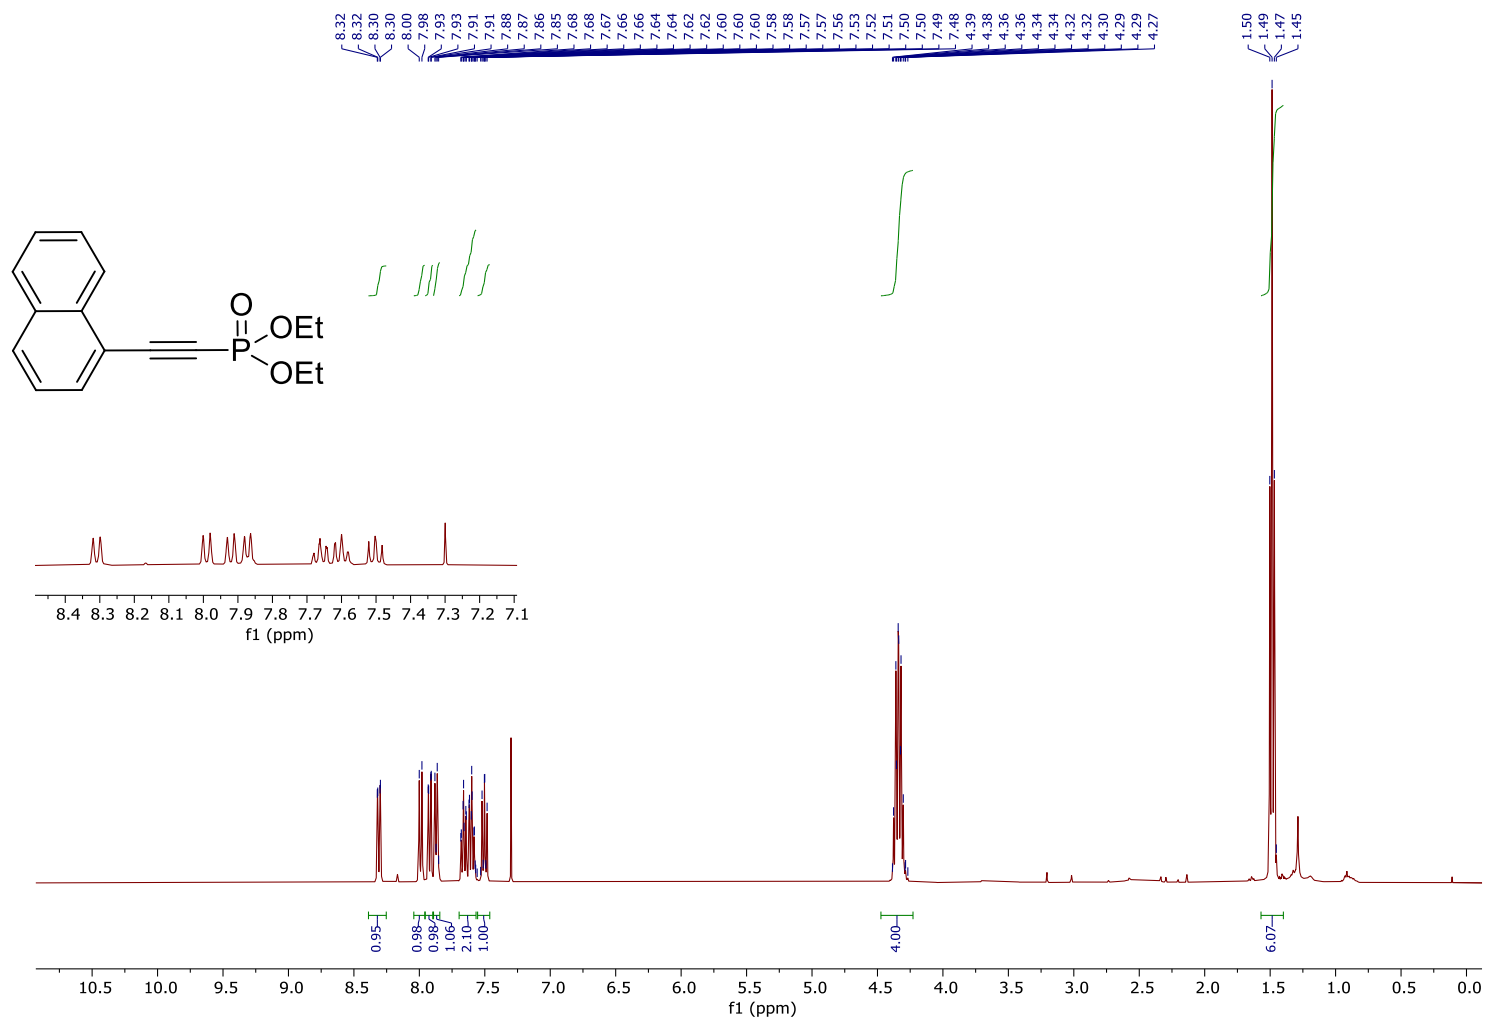

Figure S25:  $^1\text{H}$  NMR Spectra of 3j



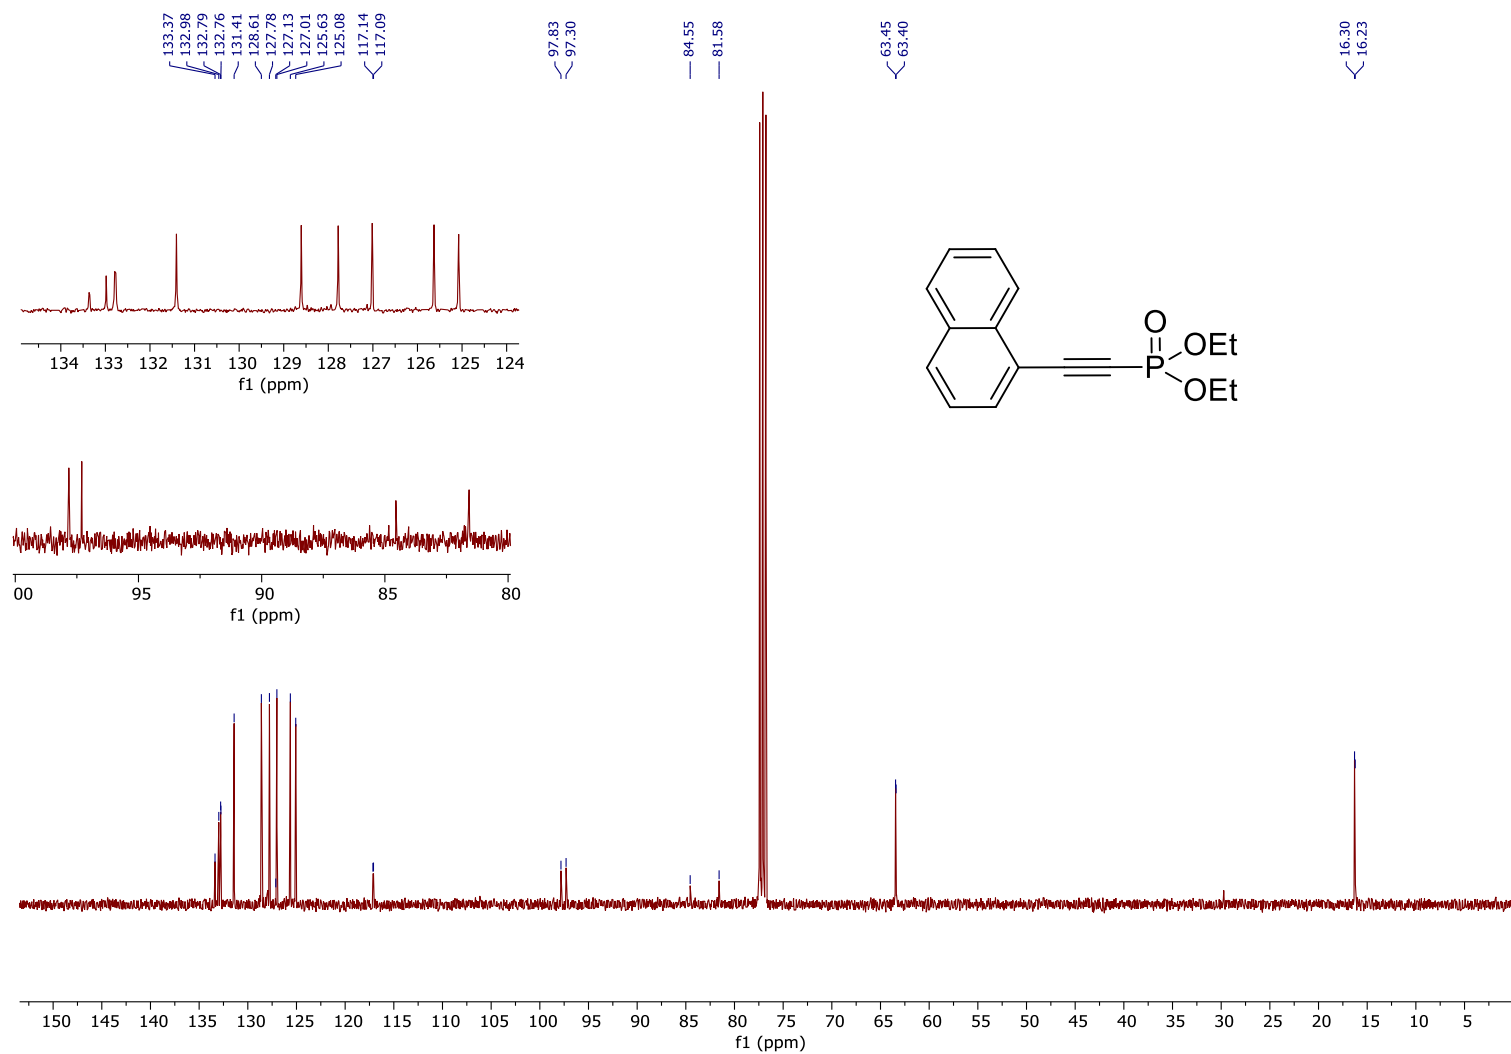

Figure S26:  $^{13}\text{C}$  NMR Spectra of **3j**

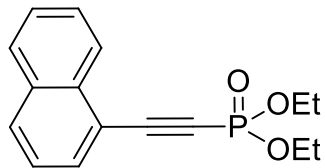

**Figure S27:  $^{31}\text{P}$  NMR Spectra of 3j**

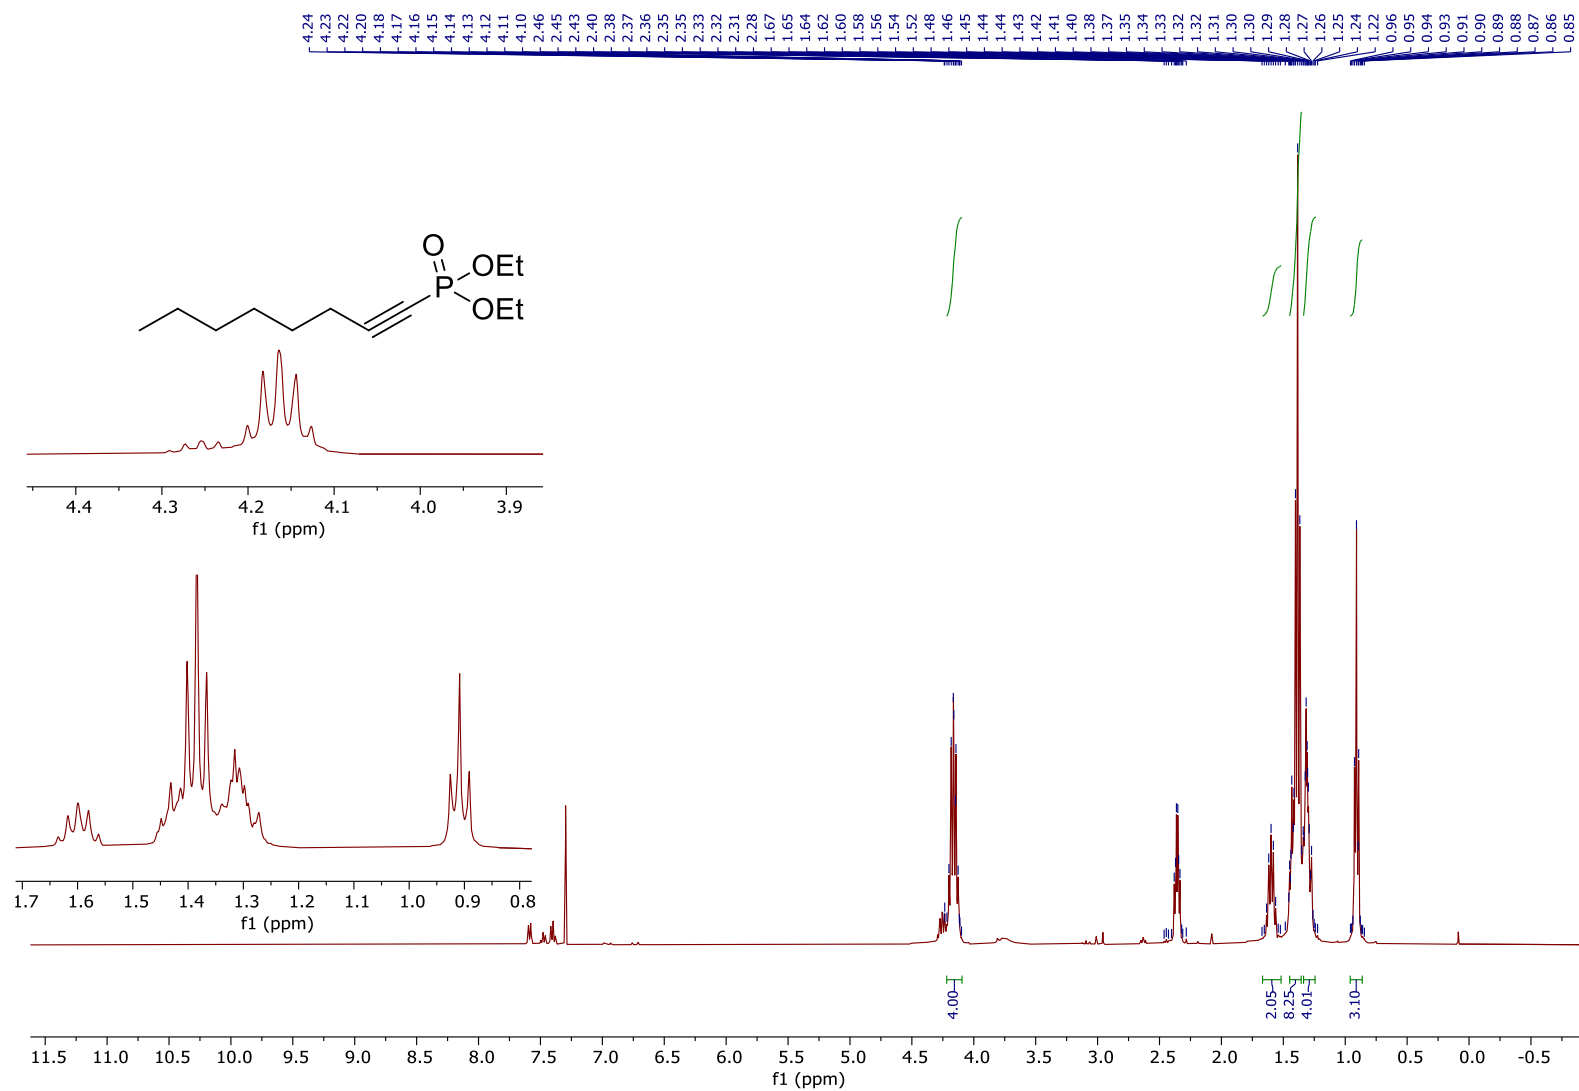

Figure S28: <sup>1</sup>H NMR Spectra of 3k

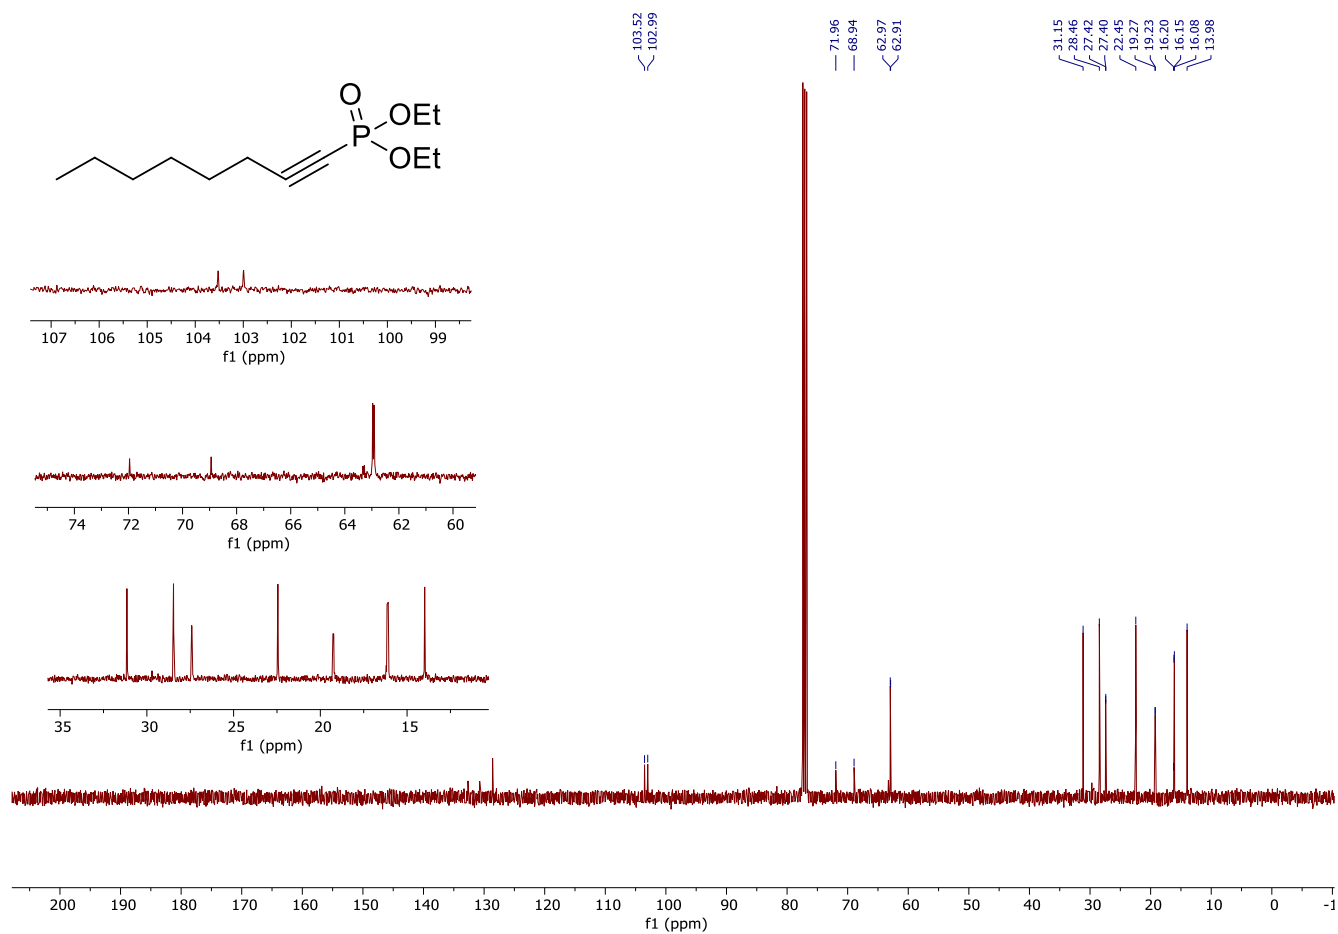

Figure S29:  $^{13}\text{C}$  NMR Spectra of 3k

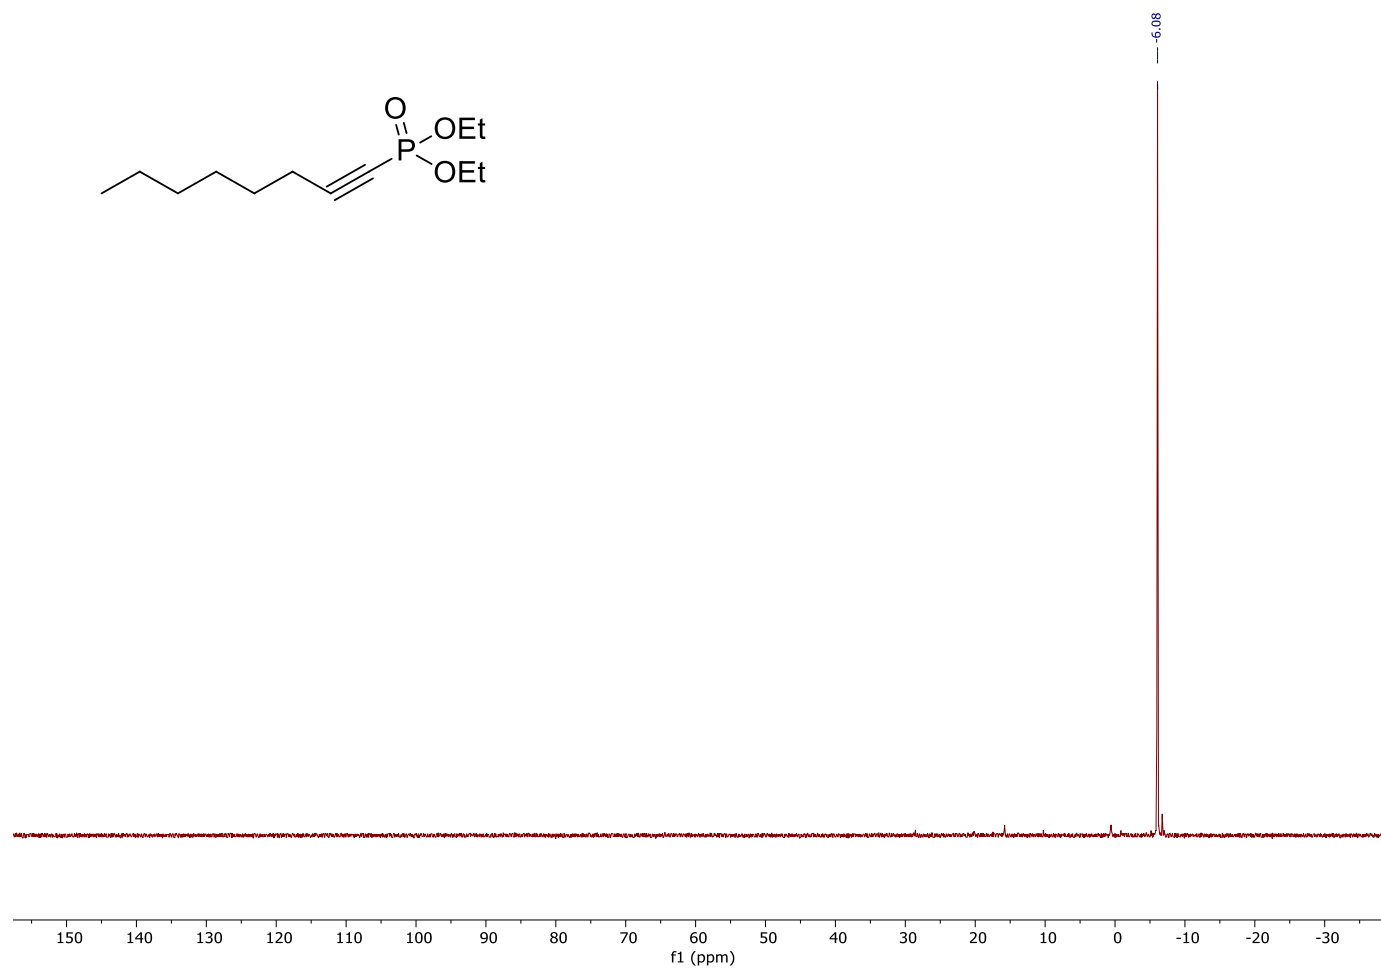

Figure S30: <sup>31</sup>P NMR Spectra of 3k

NMR/313.W6.H  
Sample Code:w6

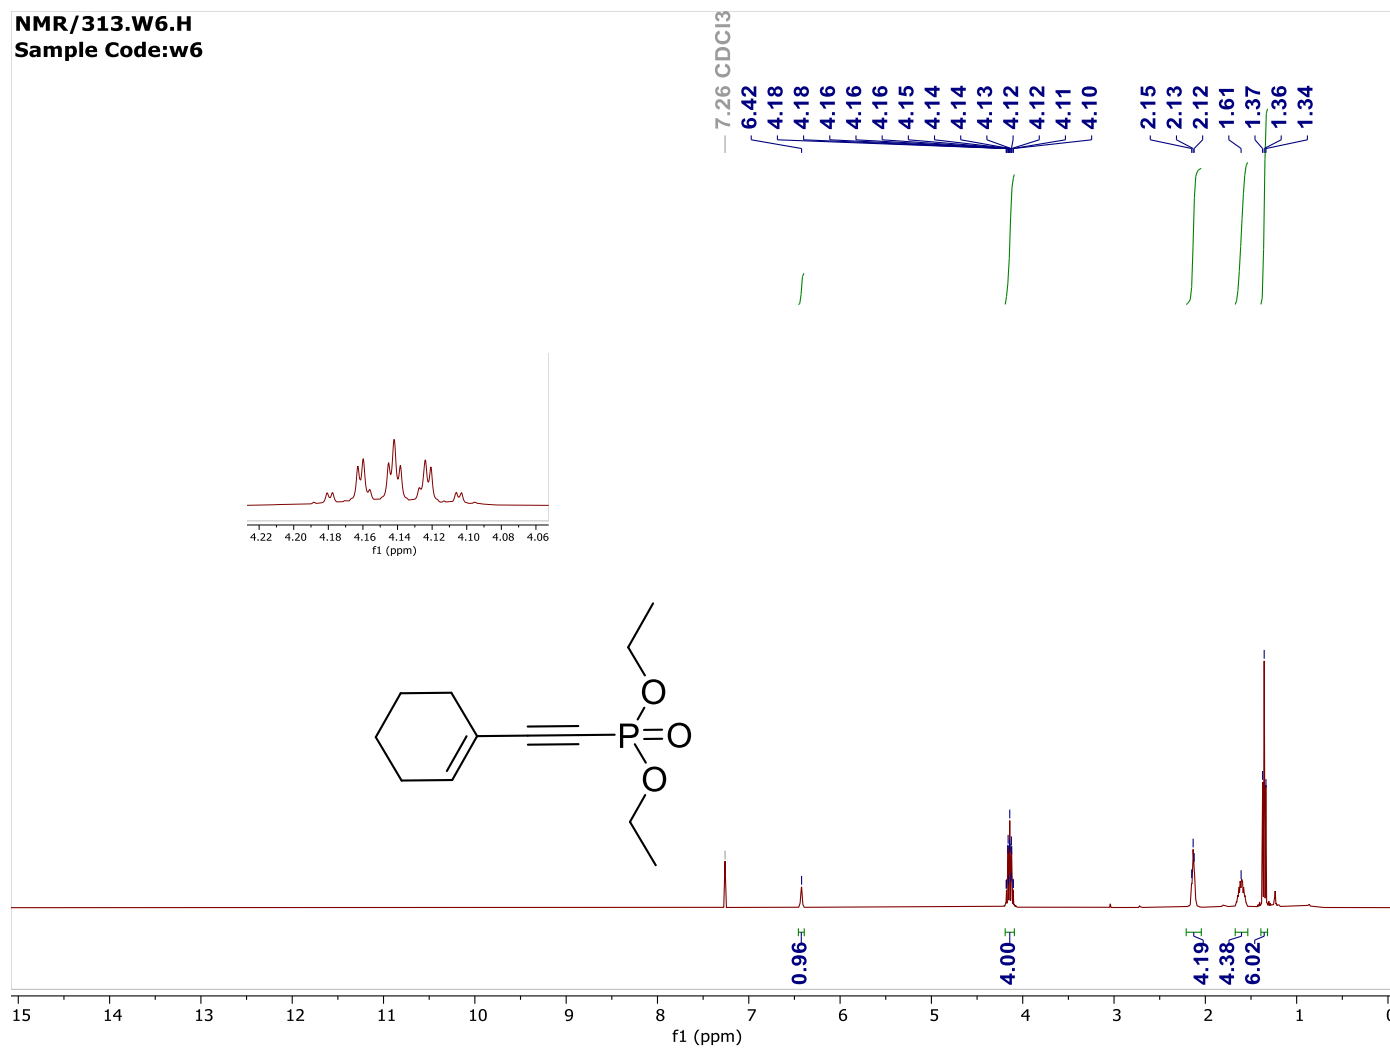

Figure S31: <sup>1</sup>H NMR Spectra of 3l

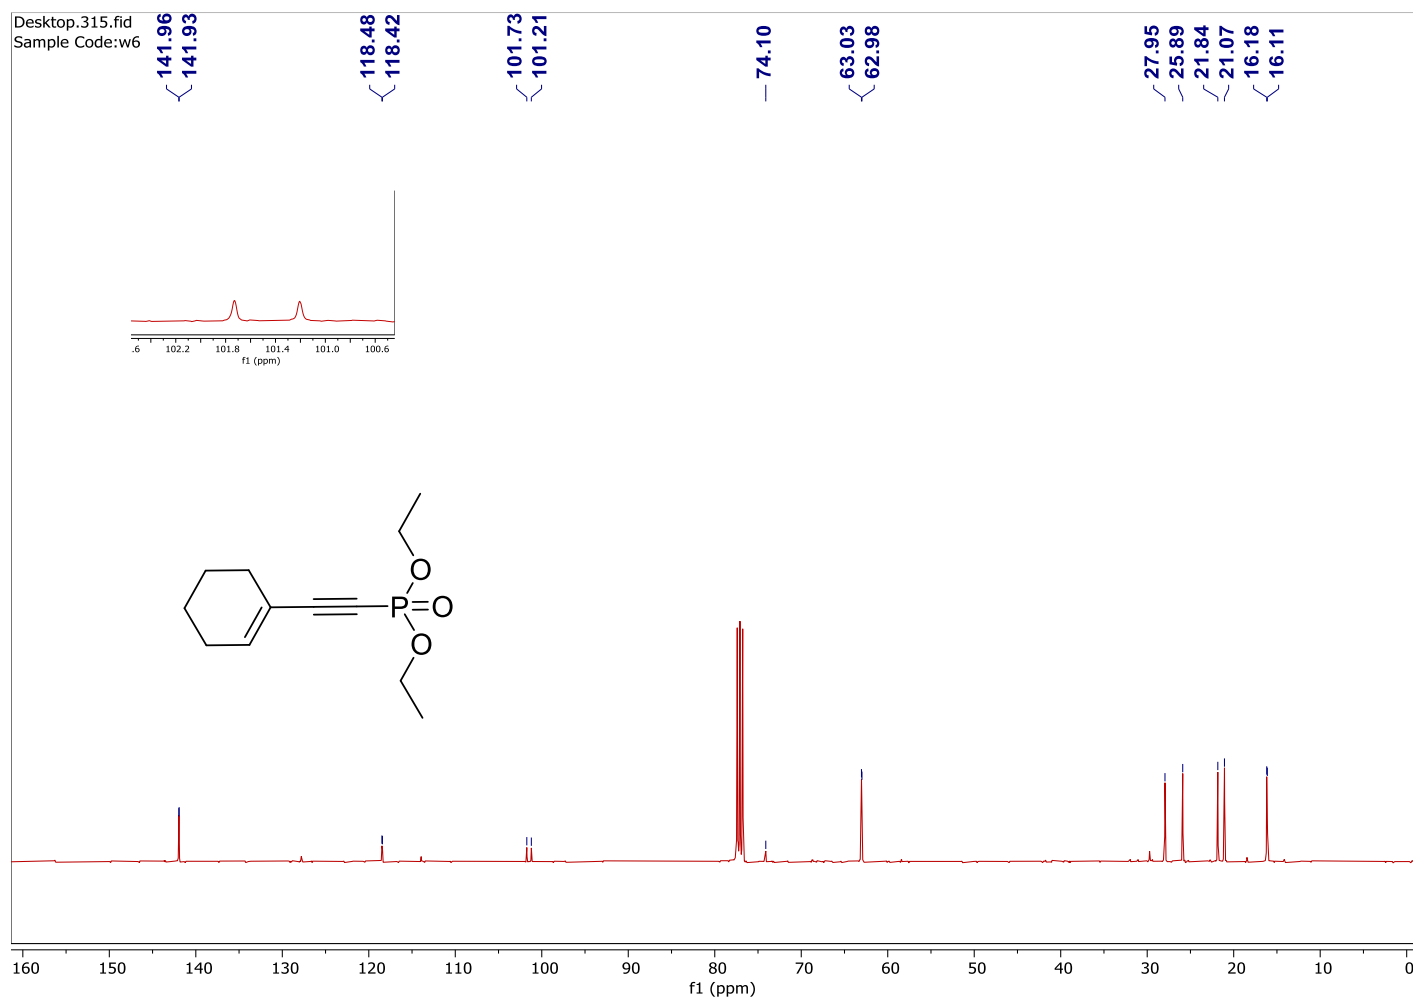

Figure S32:  $^{13}\text{C}$  NMR Spectra of 3l

**NMR/314.W6.P**  
**Sample Code:w6**

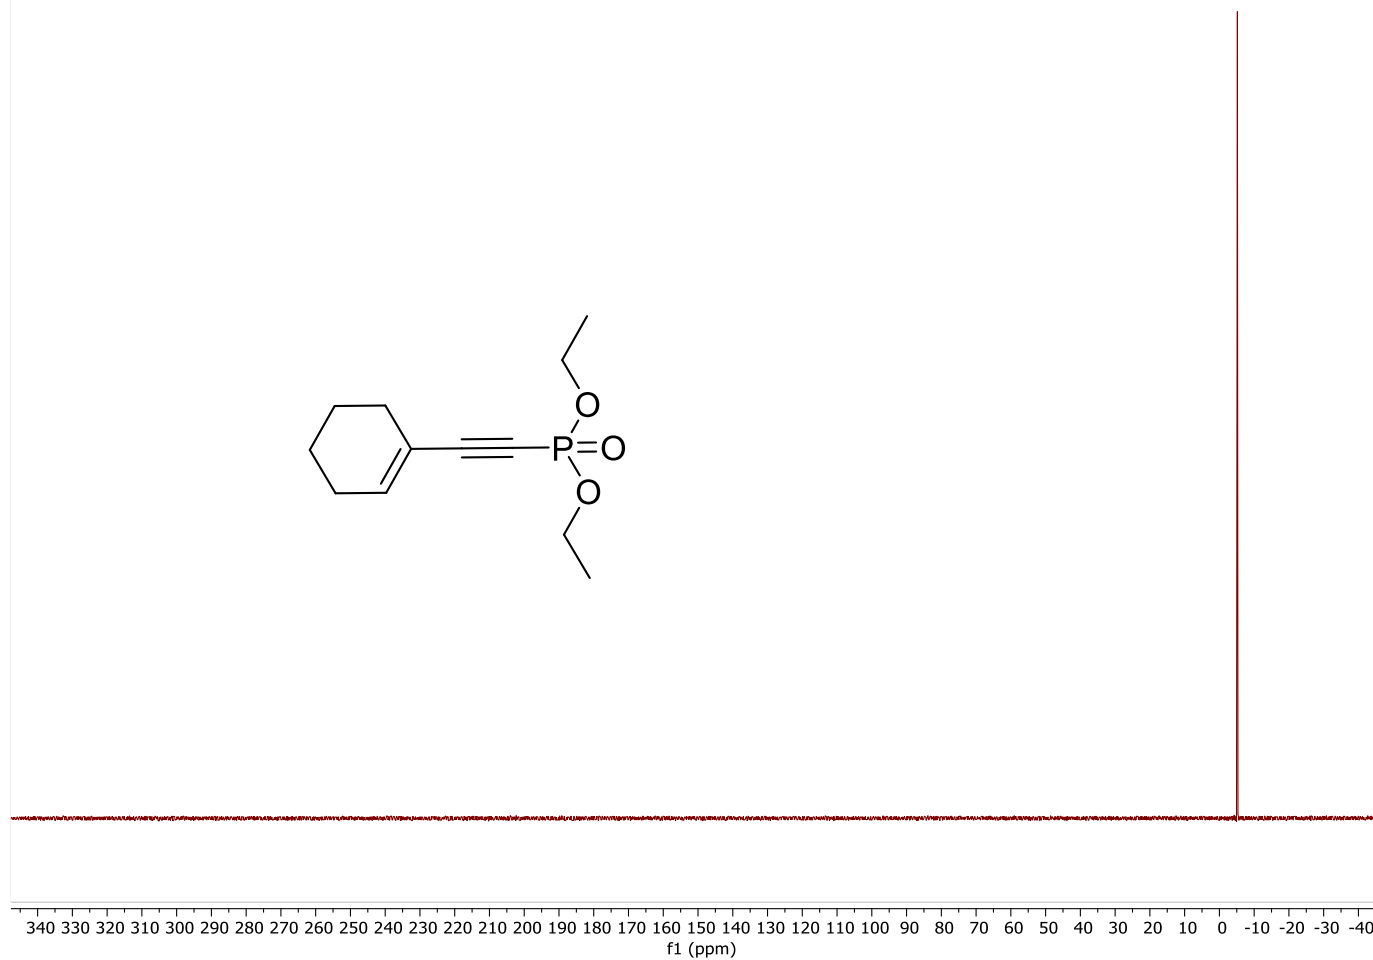

**Figure S33:  $^{31}\text{P}$  NMR Spectra of 3l**



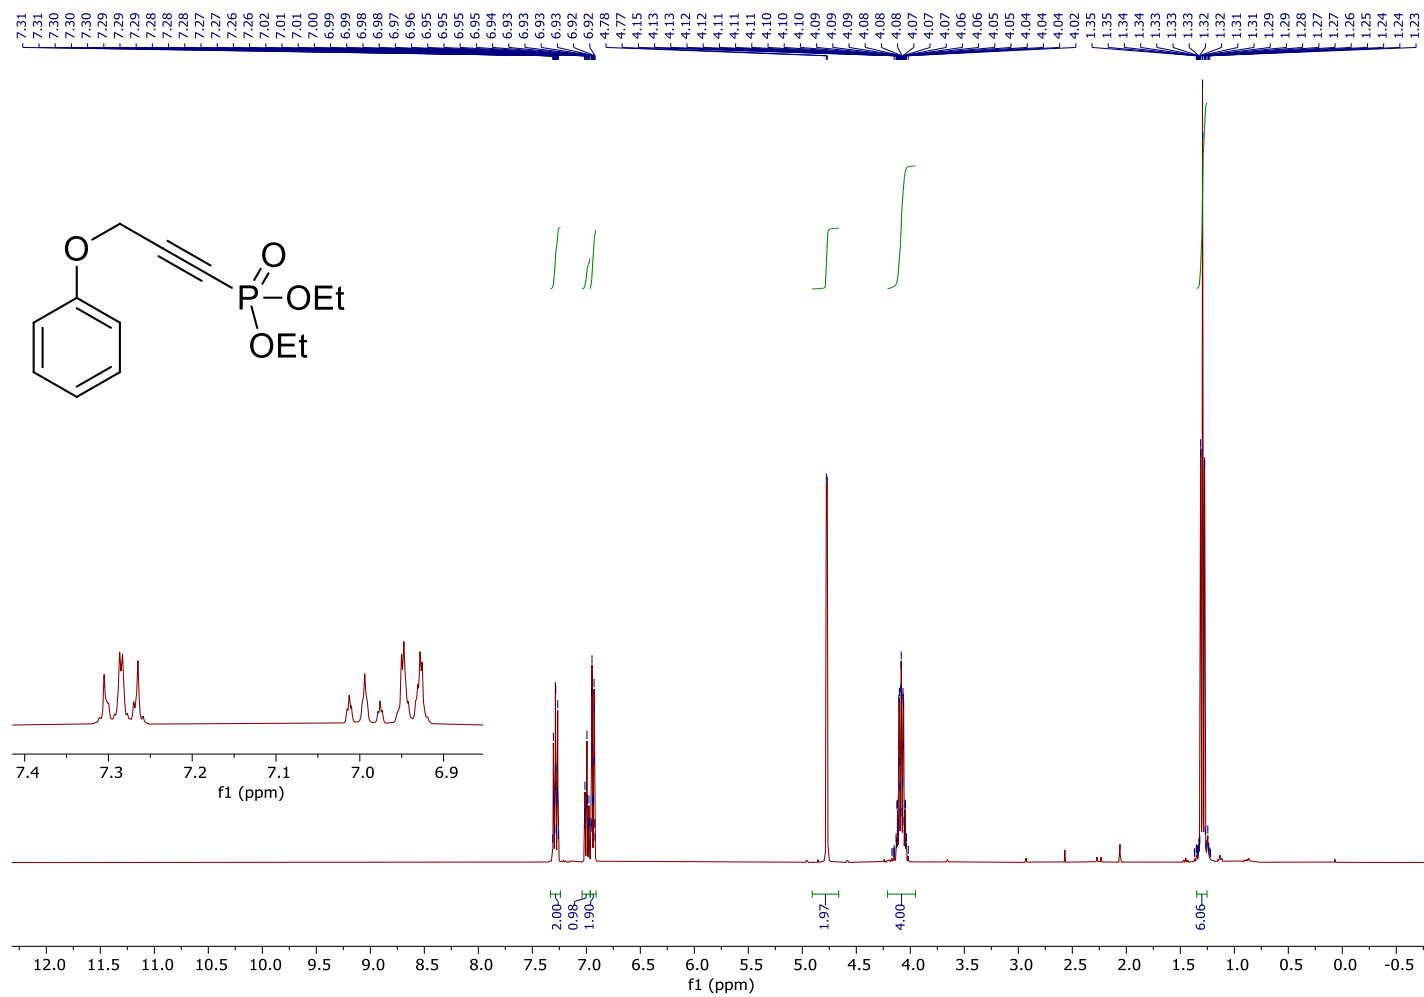

Figure S34: <sup>1</sup>H NMR Spectra of 3m

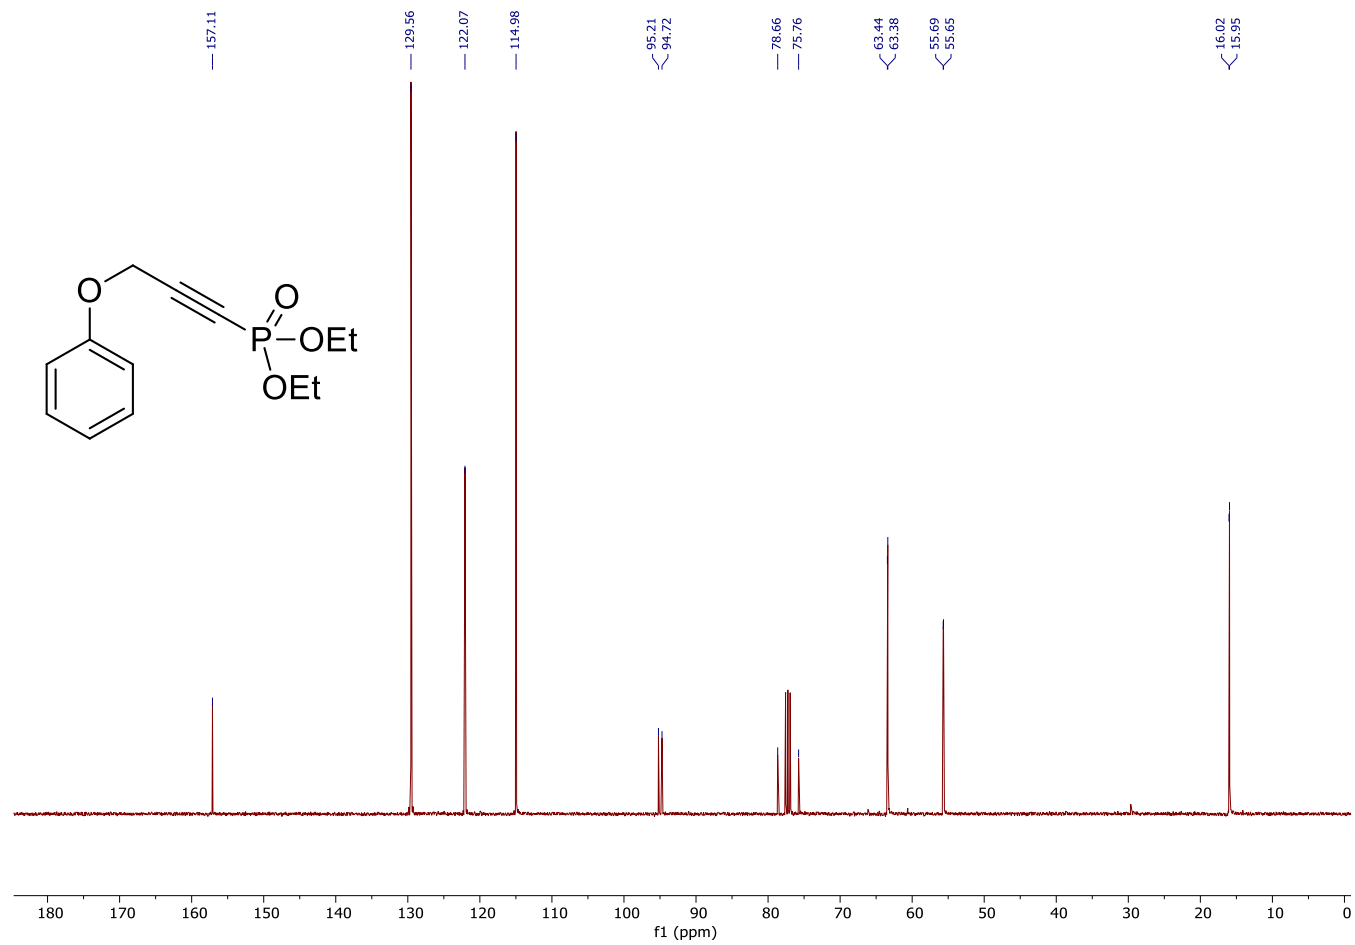

Figure S35: <sup>13</sup>C NMR Spectra of 3m

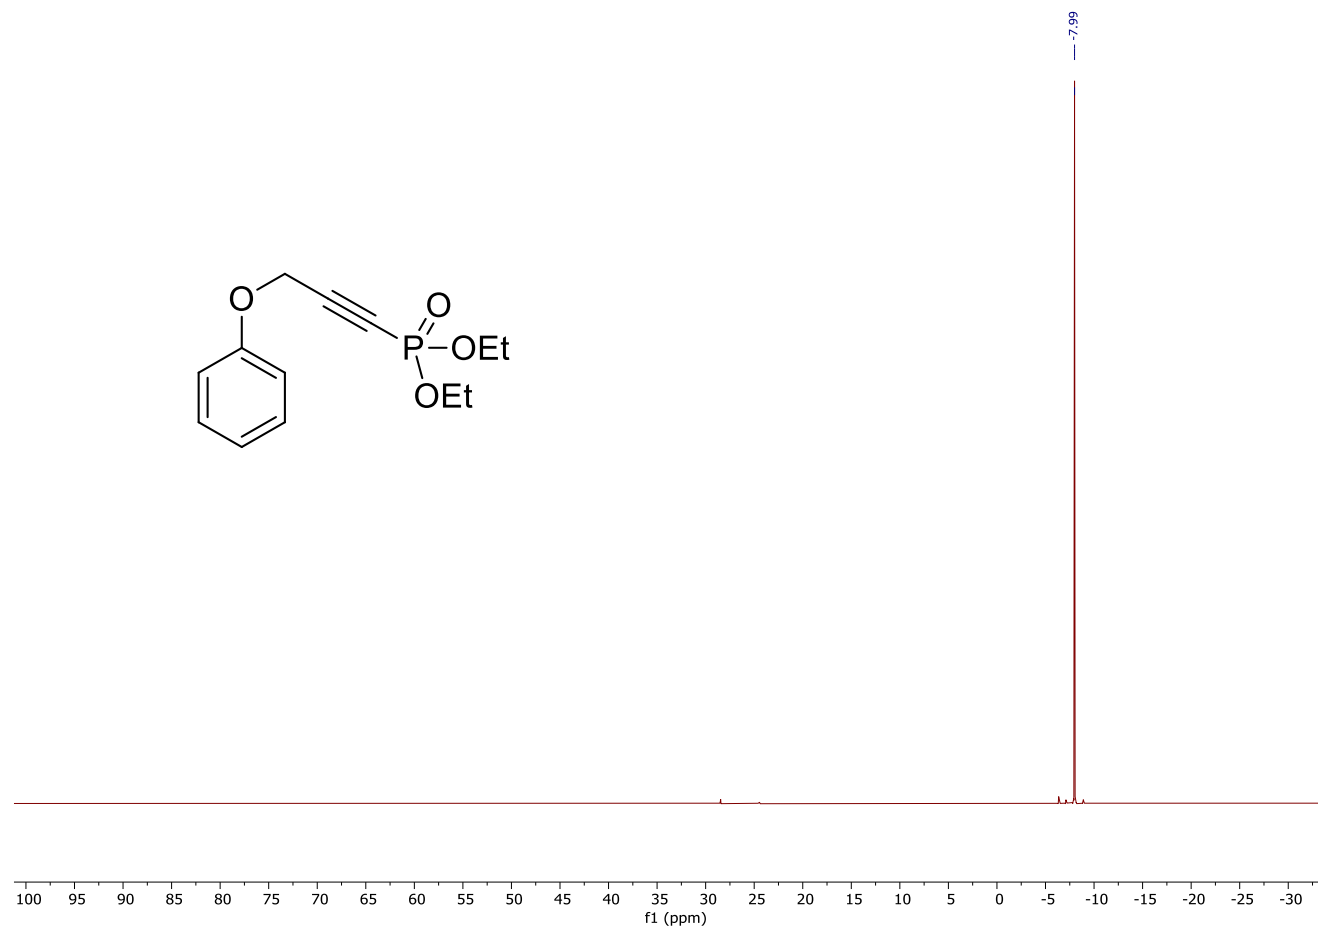

**Figure S36: <sup>31</sup>P NMR Spectra of 3m**

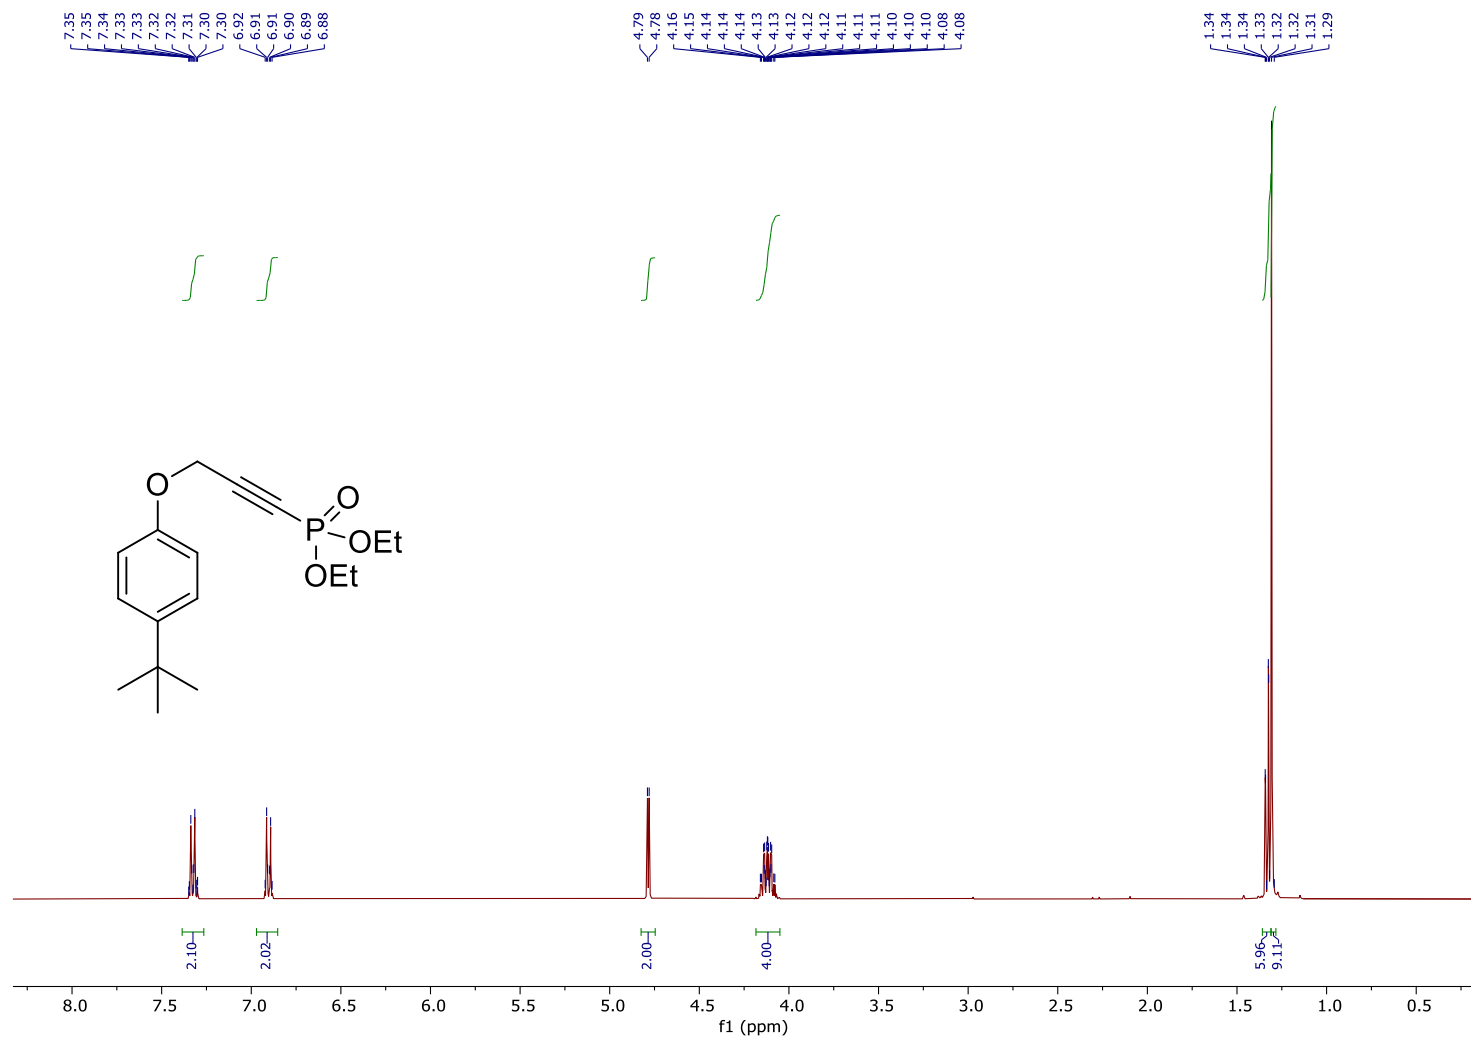

Figure S37: <sup>1</sup>H NMR Spectra of 3n

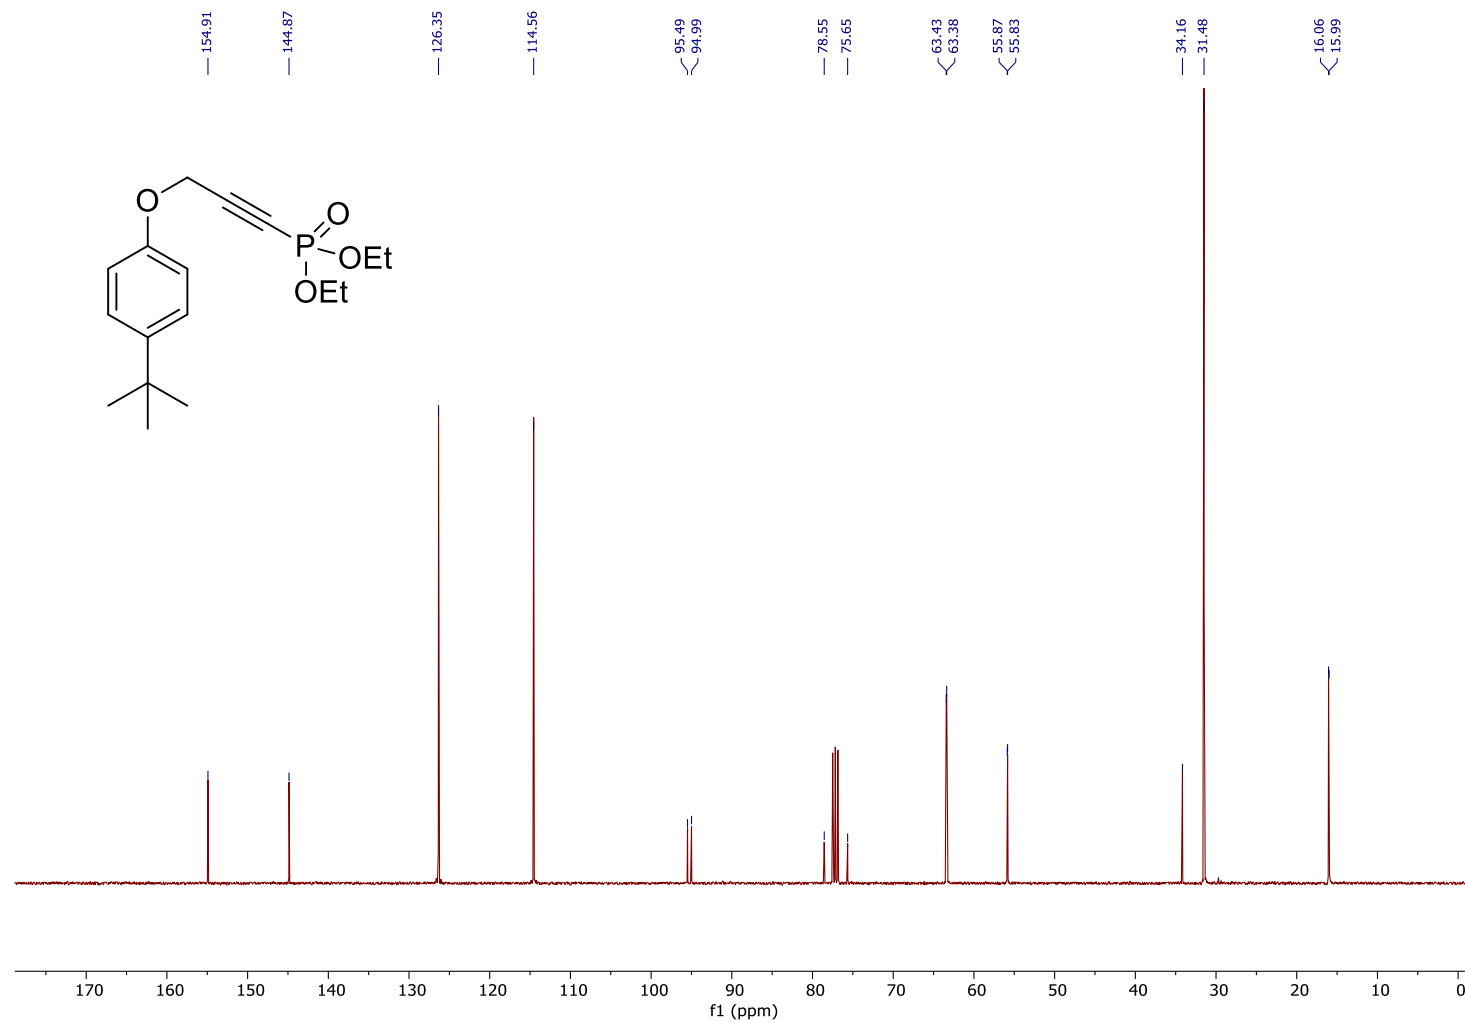

Figure S38:  $^{13}\text{C}$  NMR Spectra of 3n

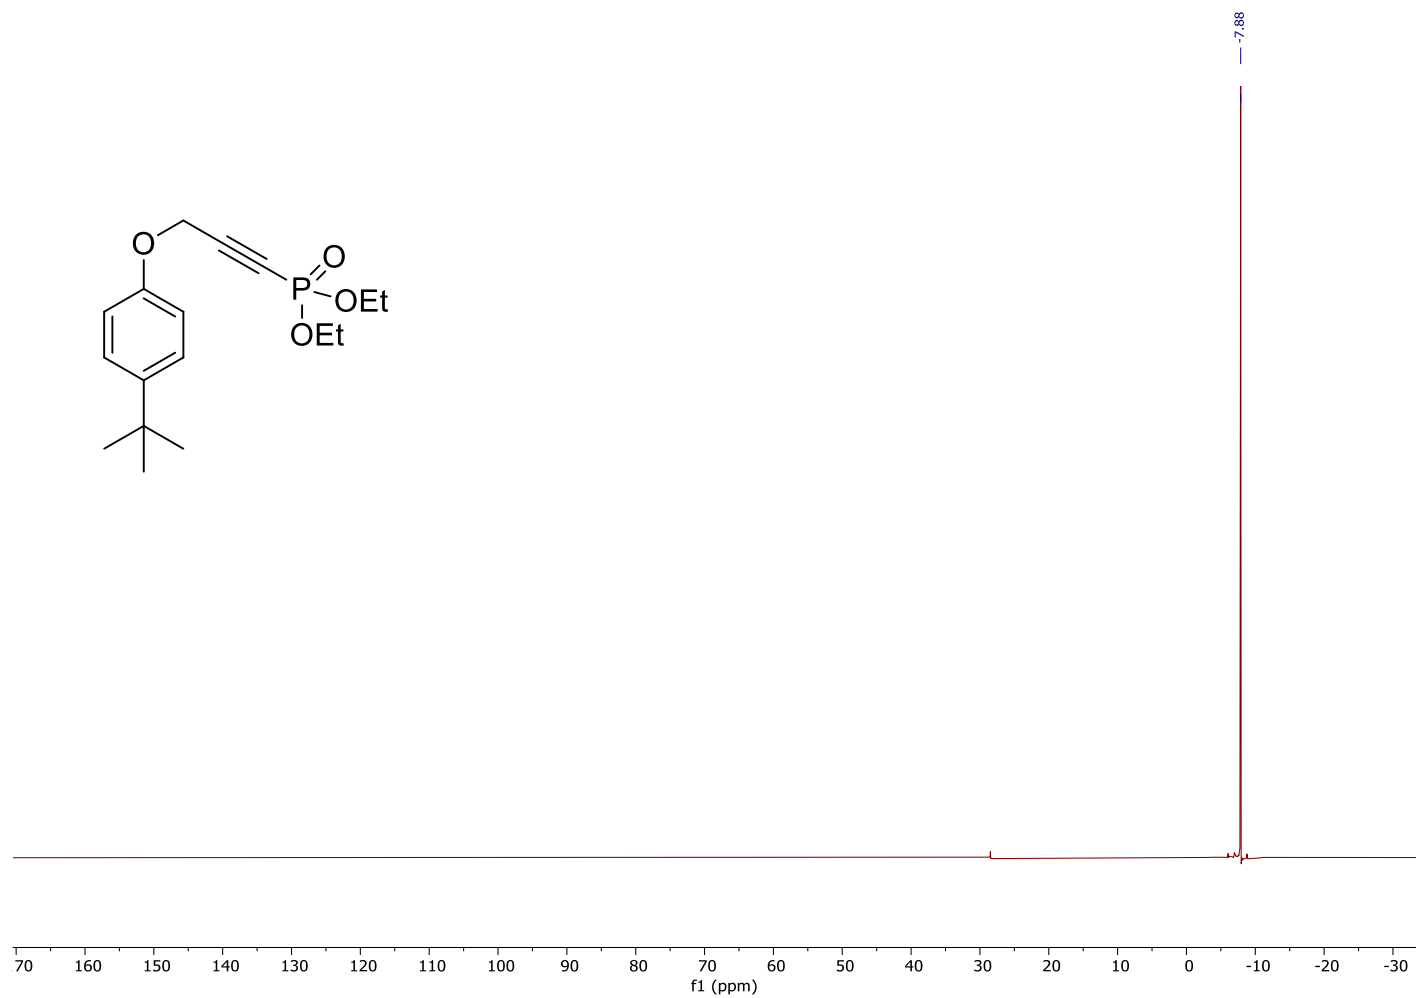

**Figure S39: <sup>31</sup>P NMR Spectra of 3n**

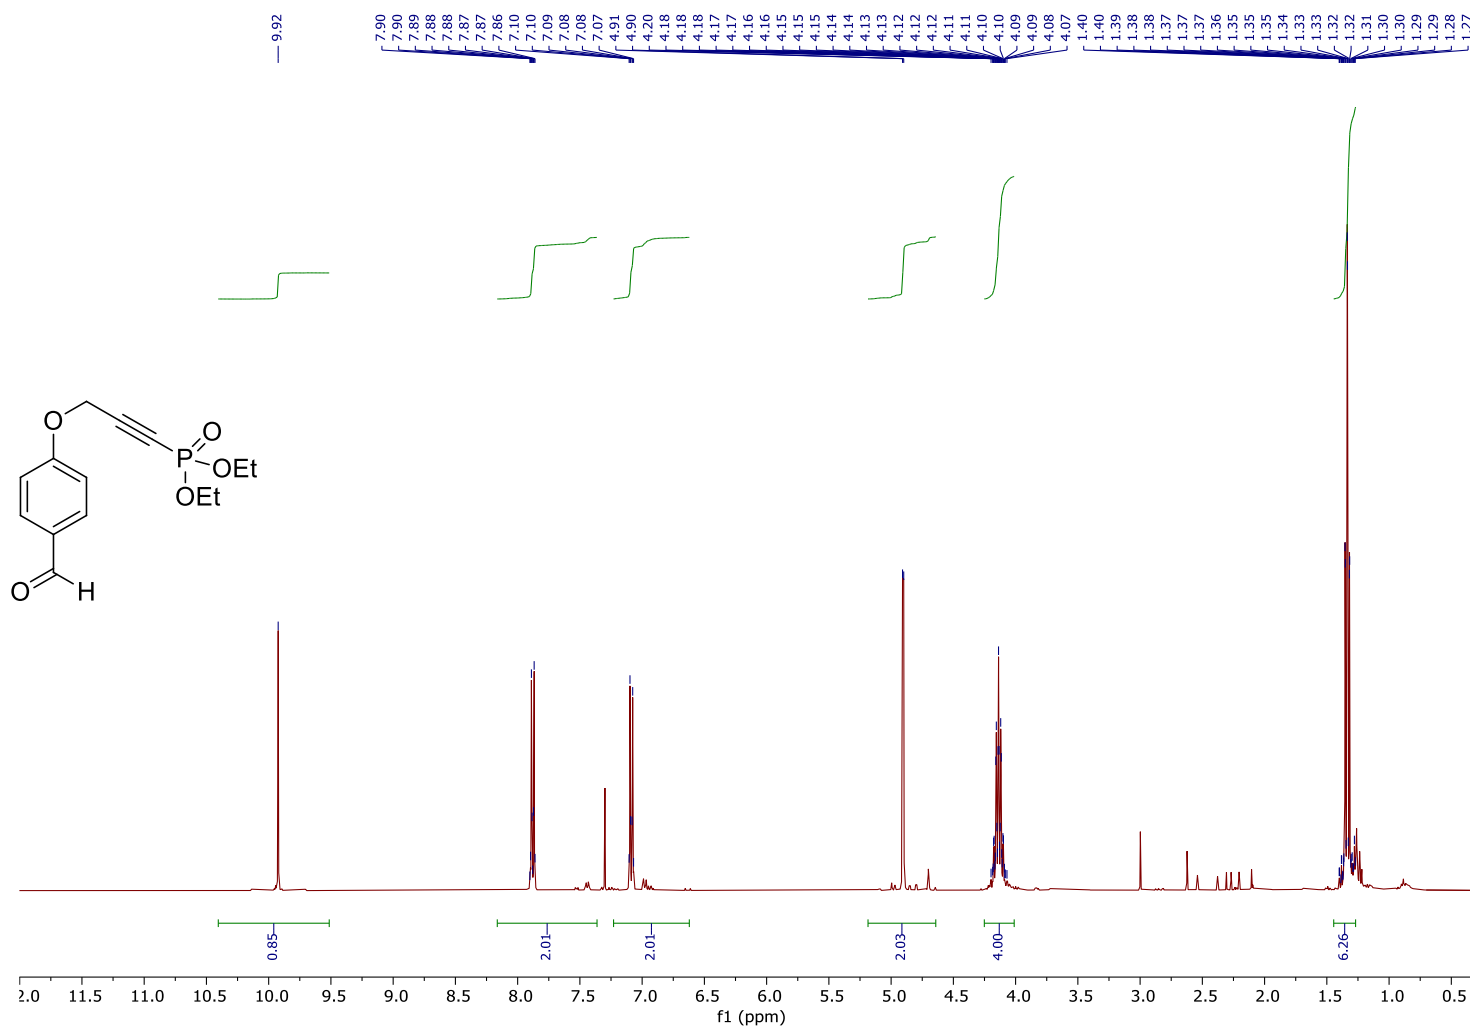

Figure S40: <sup>1</sup>H NMR Spectra of 3o

**F Figure S44:  $^{13}\text{C}$  NMR Spectra of 3o**

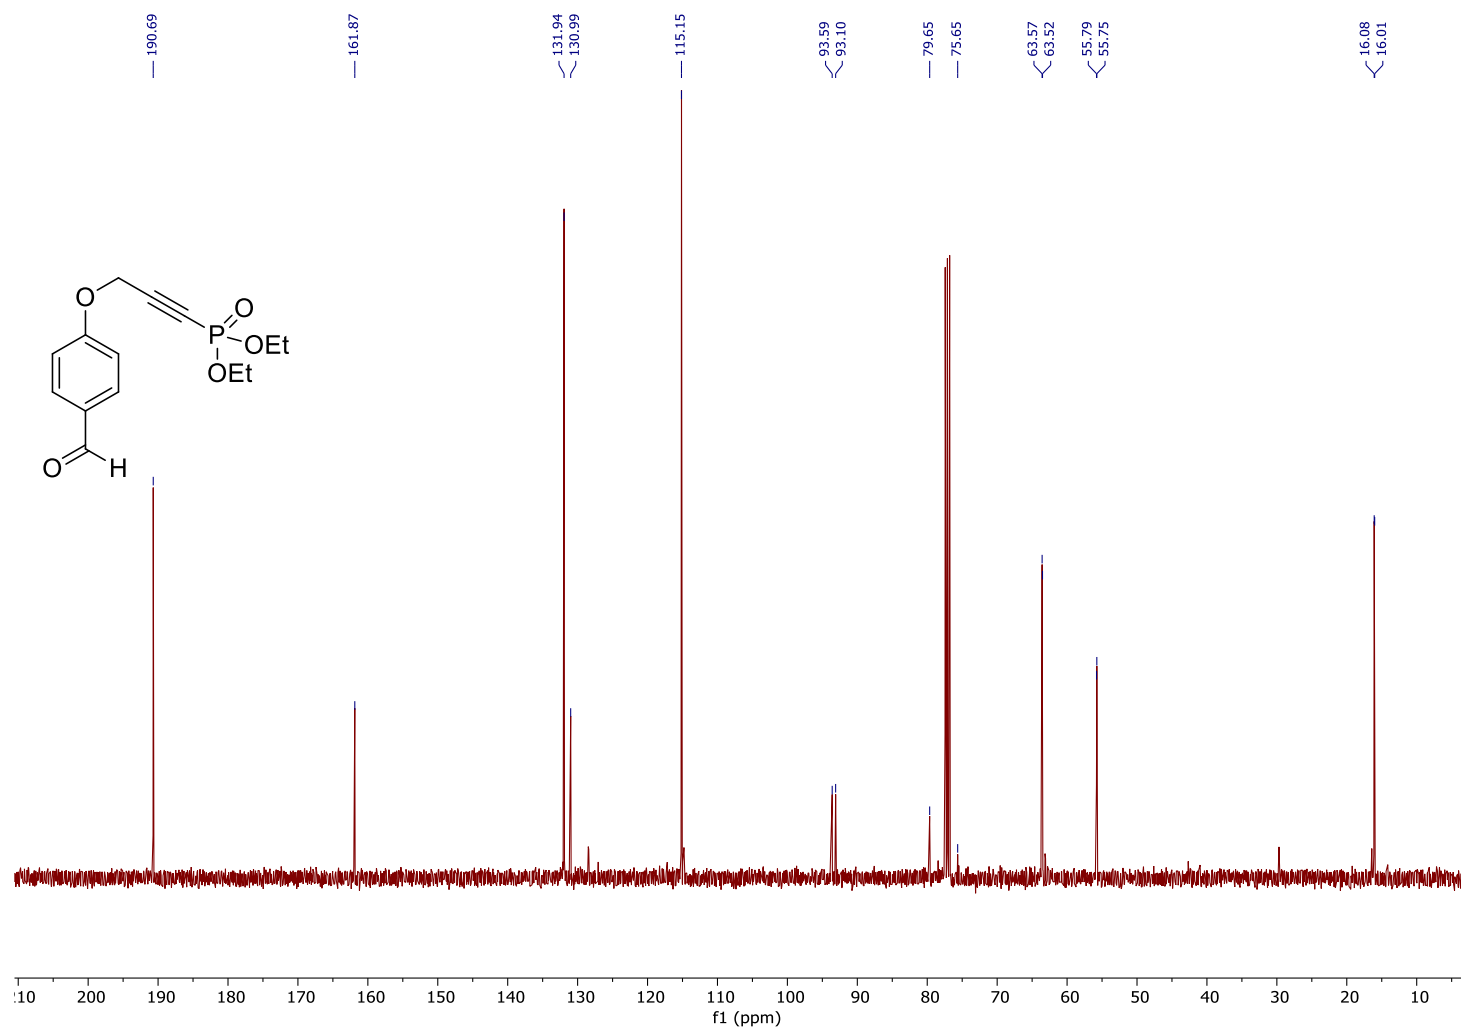

**Figure S41:  $^{13}\text{C}$  NMR Spectra of 3o**



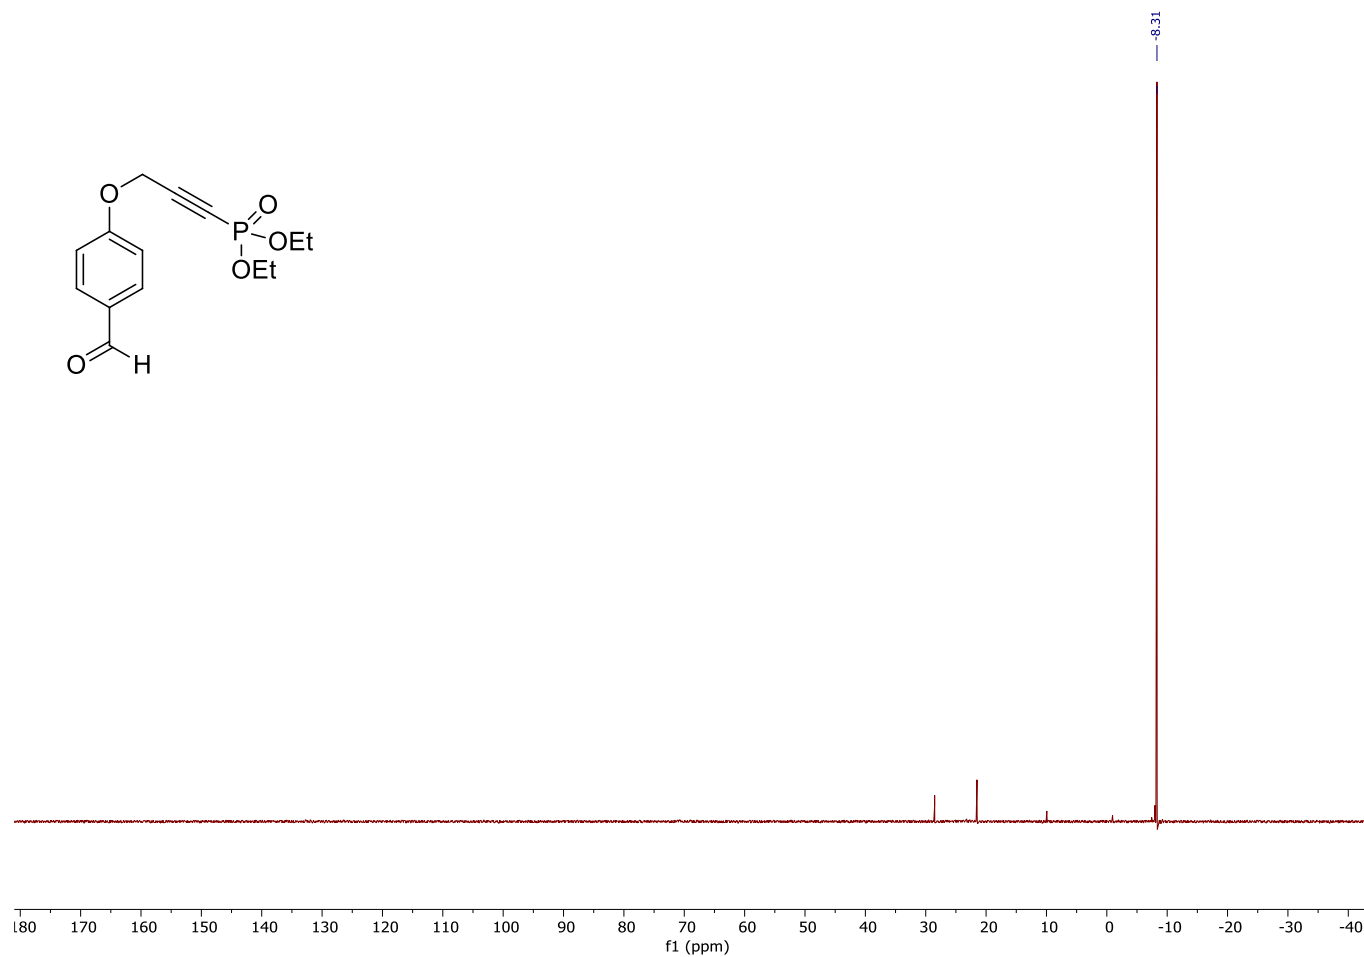

Figure S42: <sup>31</sup>P NMR Spectra of 3o

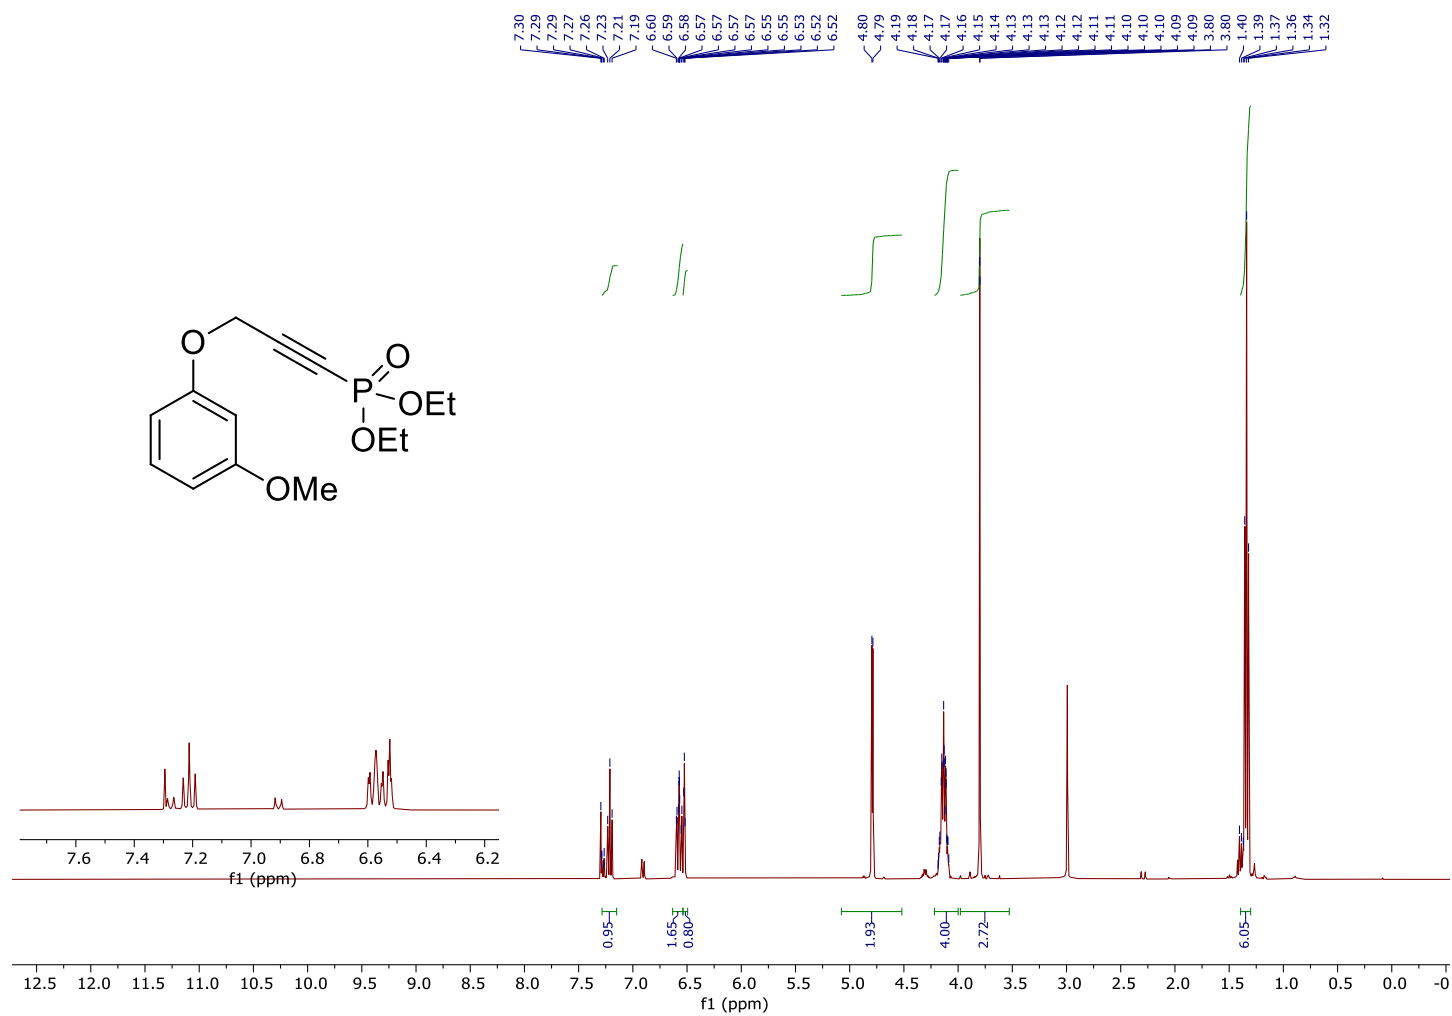

Figure S43: <sup>1</sup>H NMR Spectra of 3p

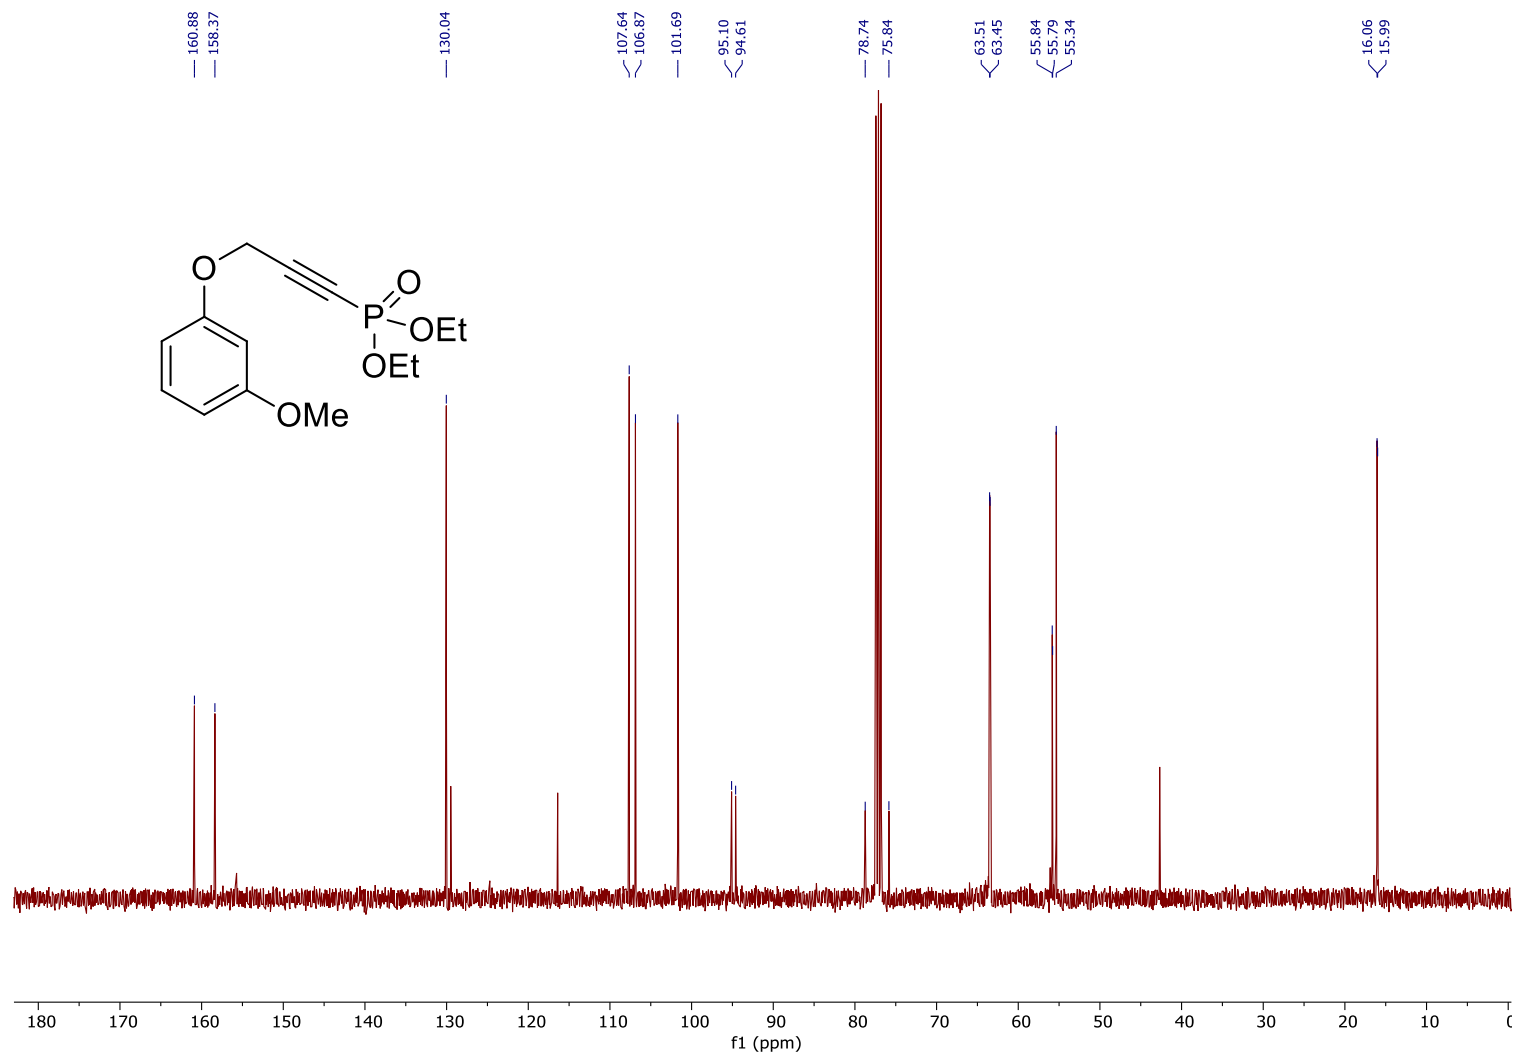

Figure S44:  $^{13}\text{C}$  NMR Spectra of 3p

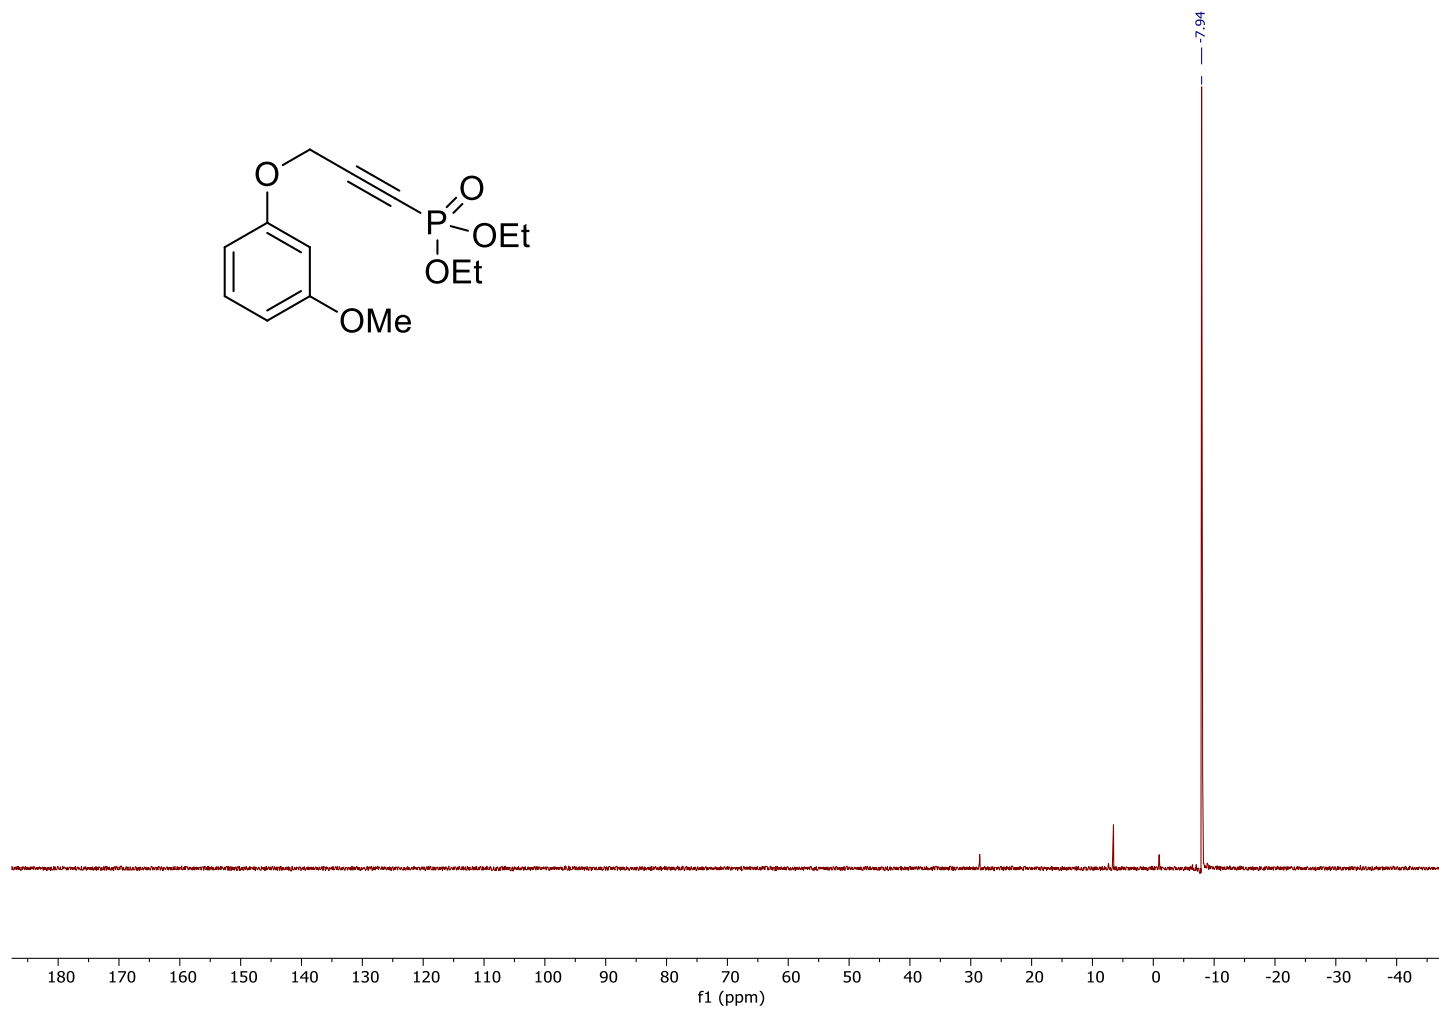

Figure S45:  $^{31}\text{P}$  NMR Spectra of 3p

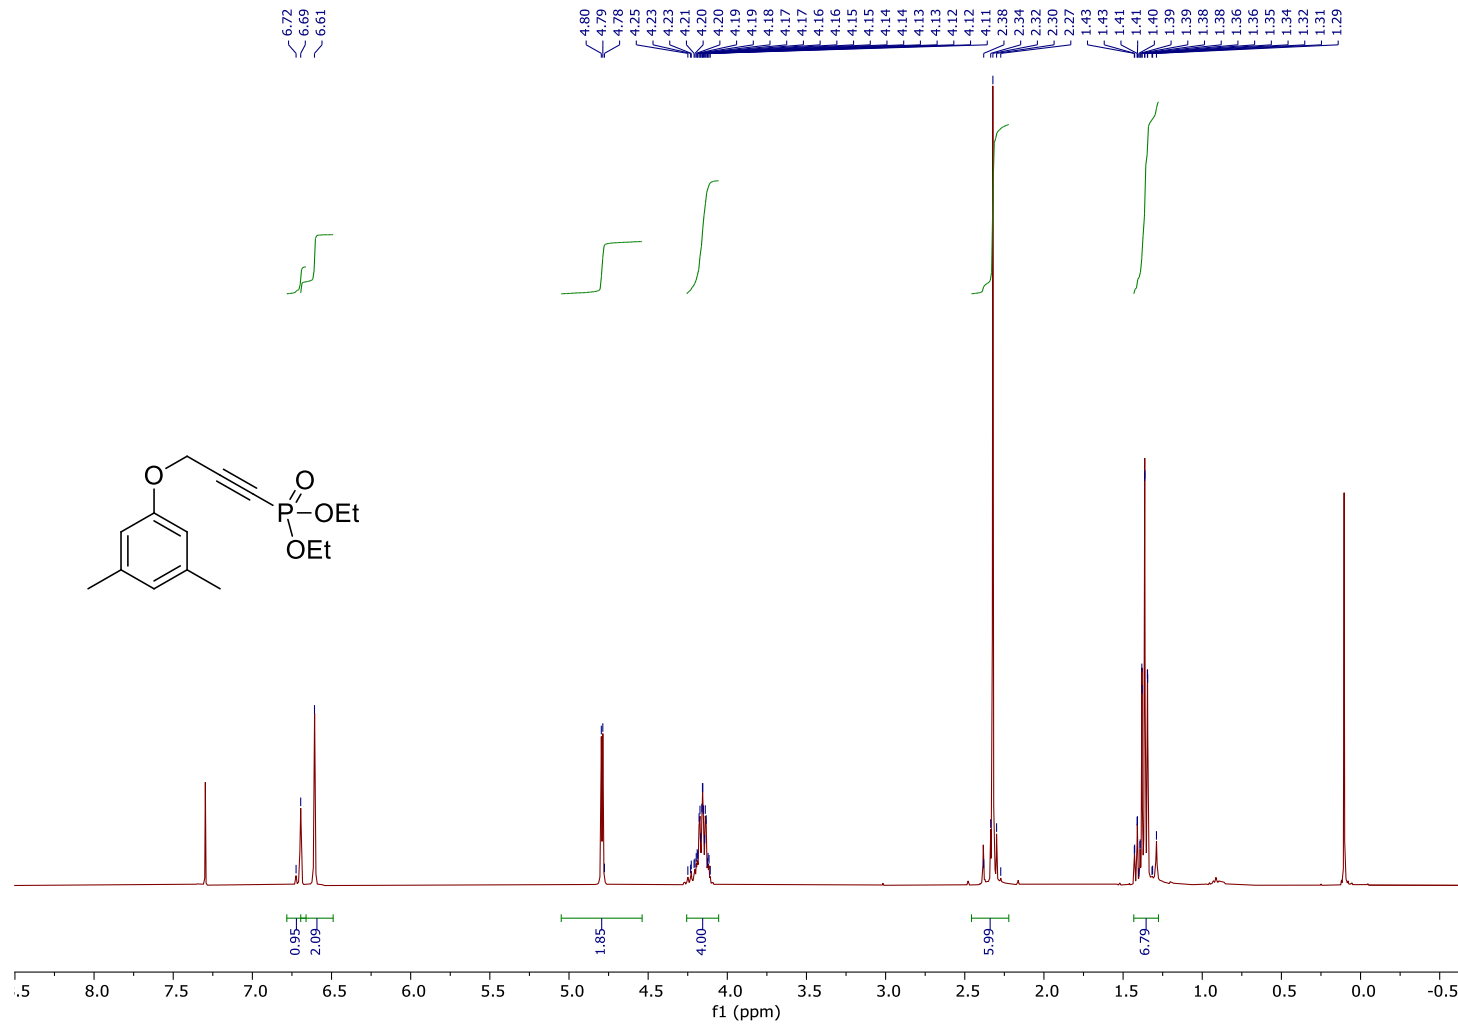

Figure S46: <sup>1</sup>H NMR Spectra of 3q

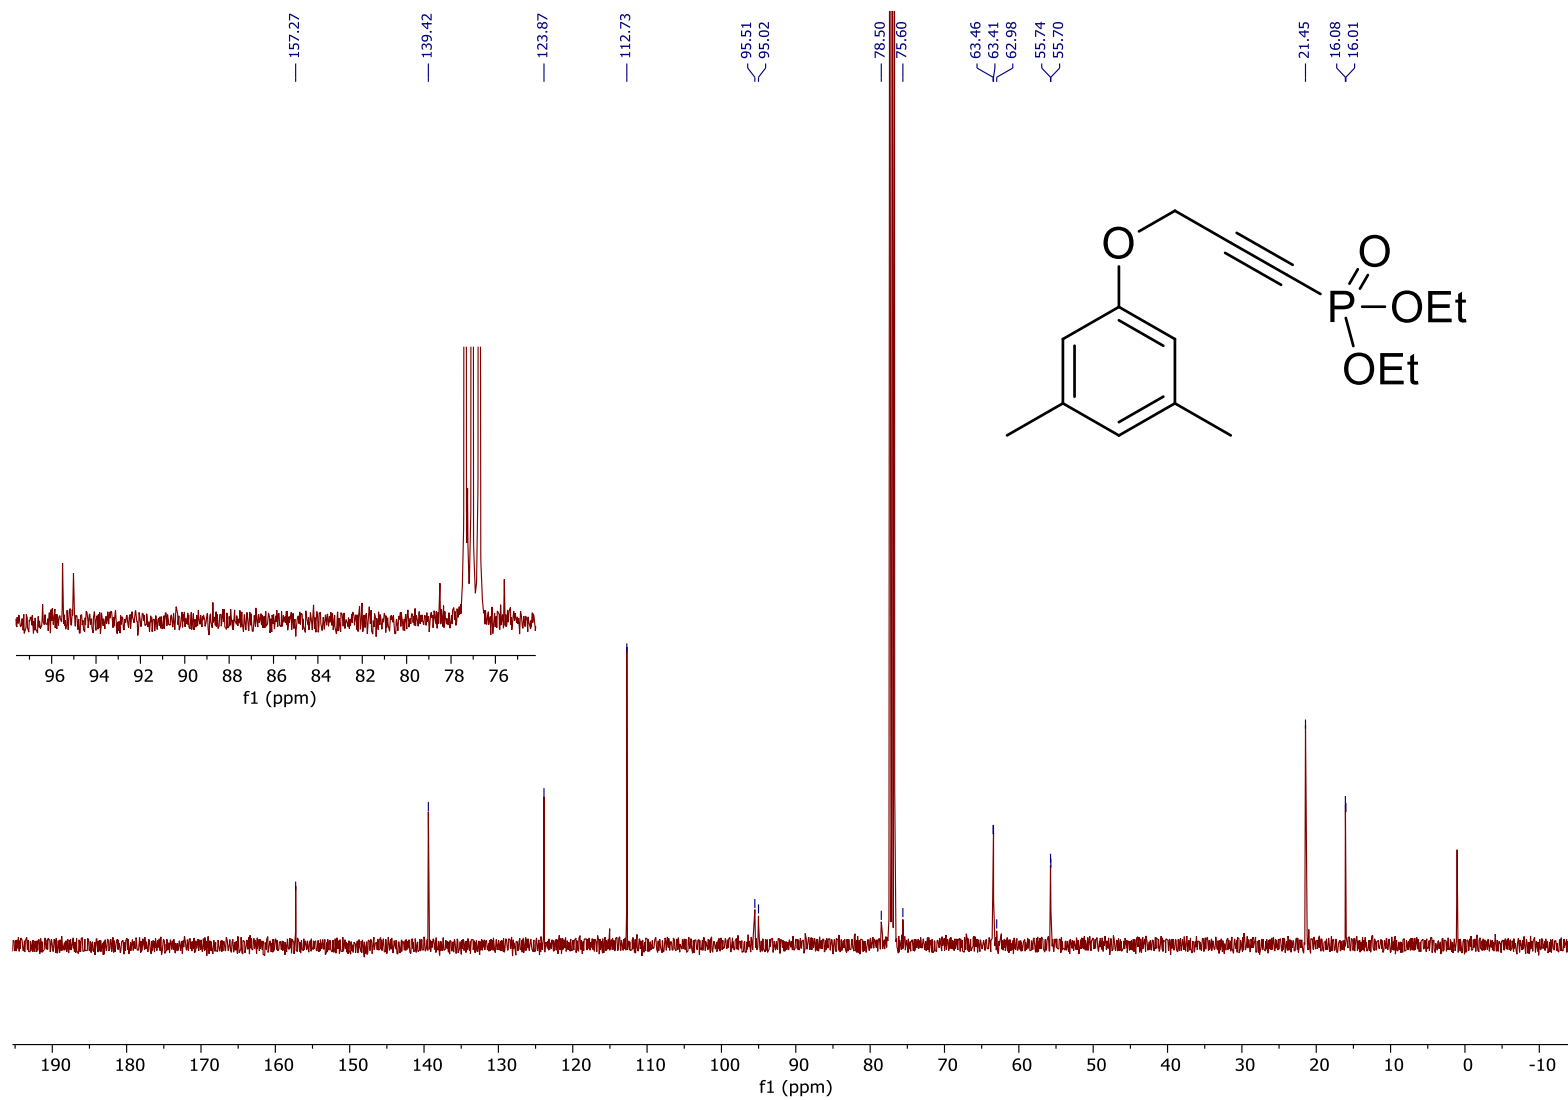

Figure S47:  $^{13}\text{C}$  NMR Spectra of 3q

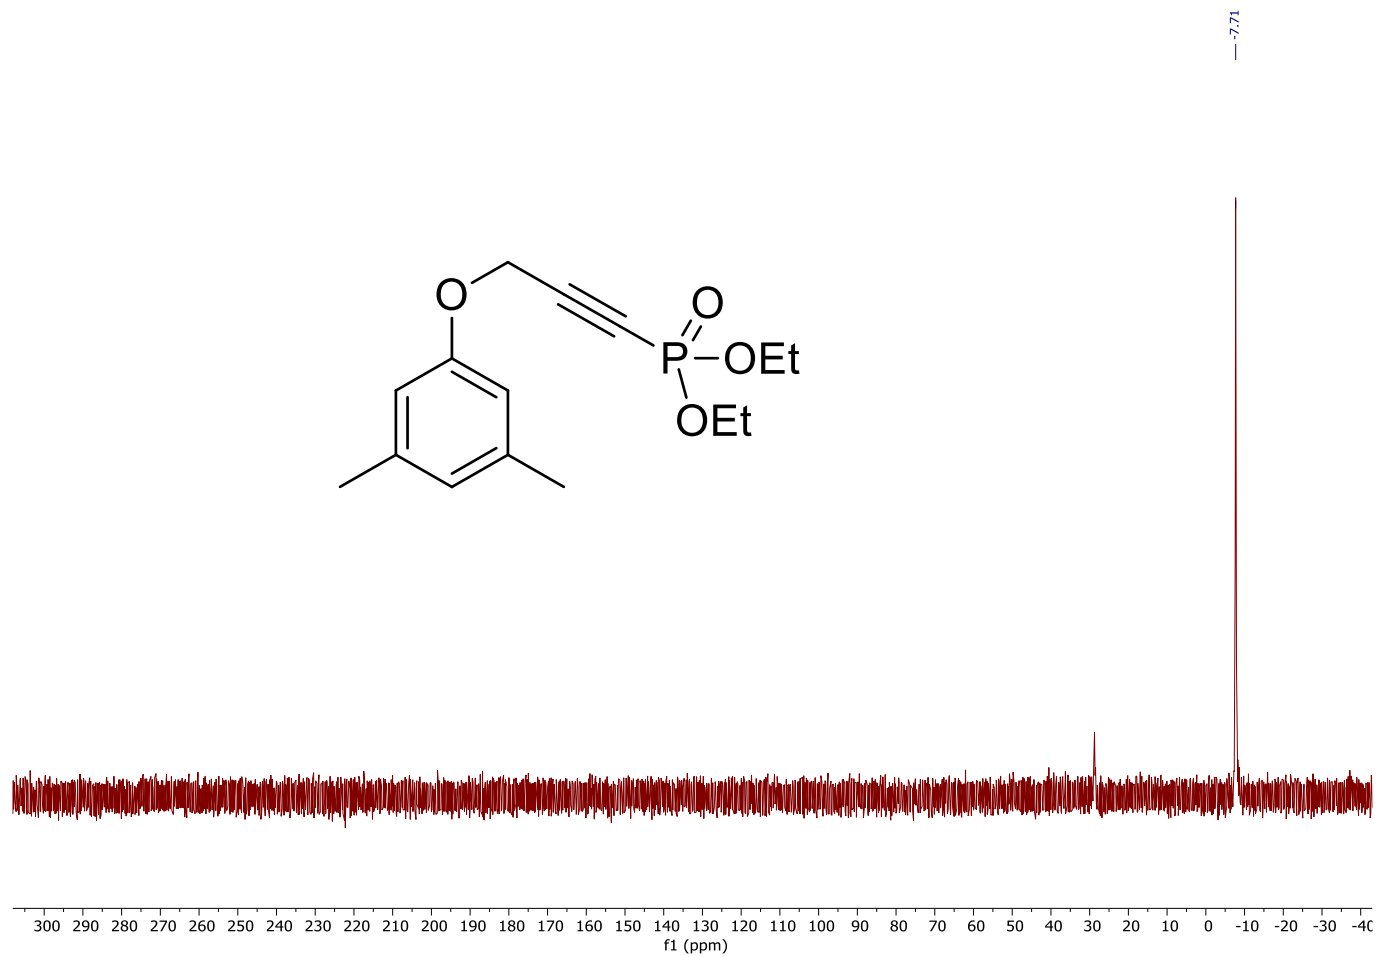

Figure S48: <sup>31</sup>P NMR Spectra of 3q

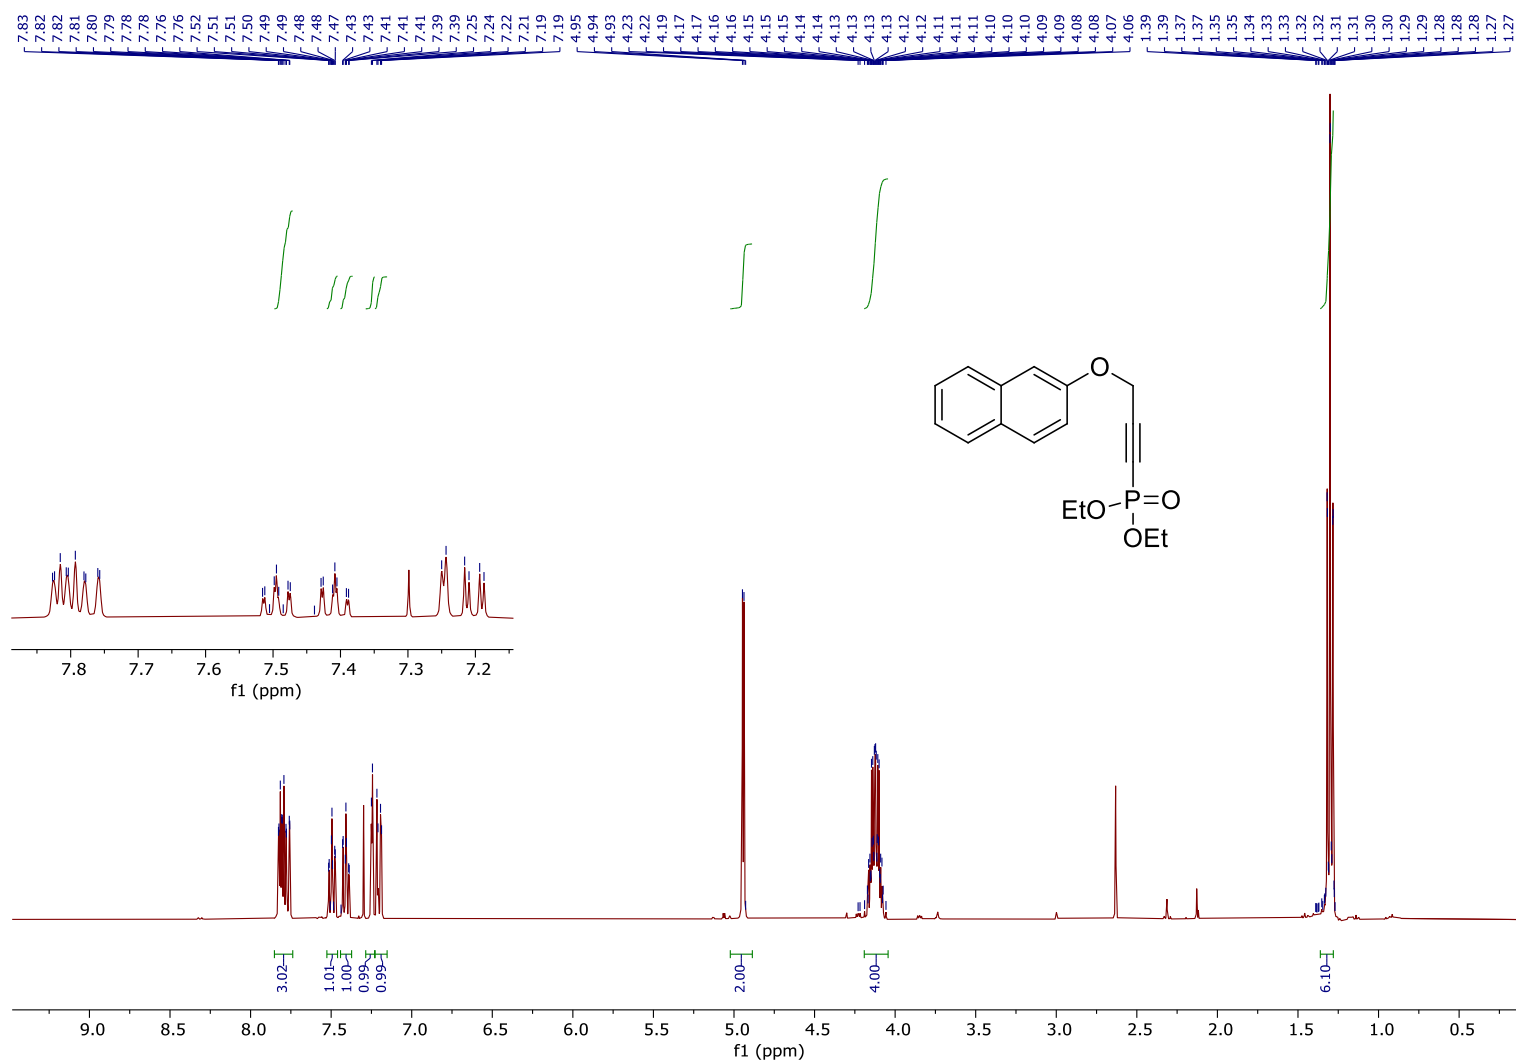

Figure S49: <sup>1</sup>H NMR Spectra of 3r



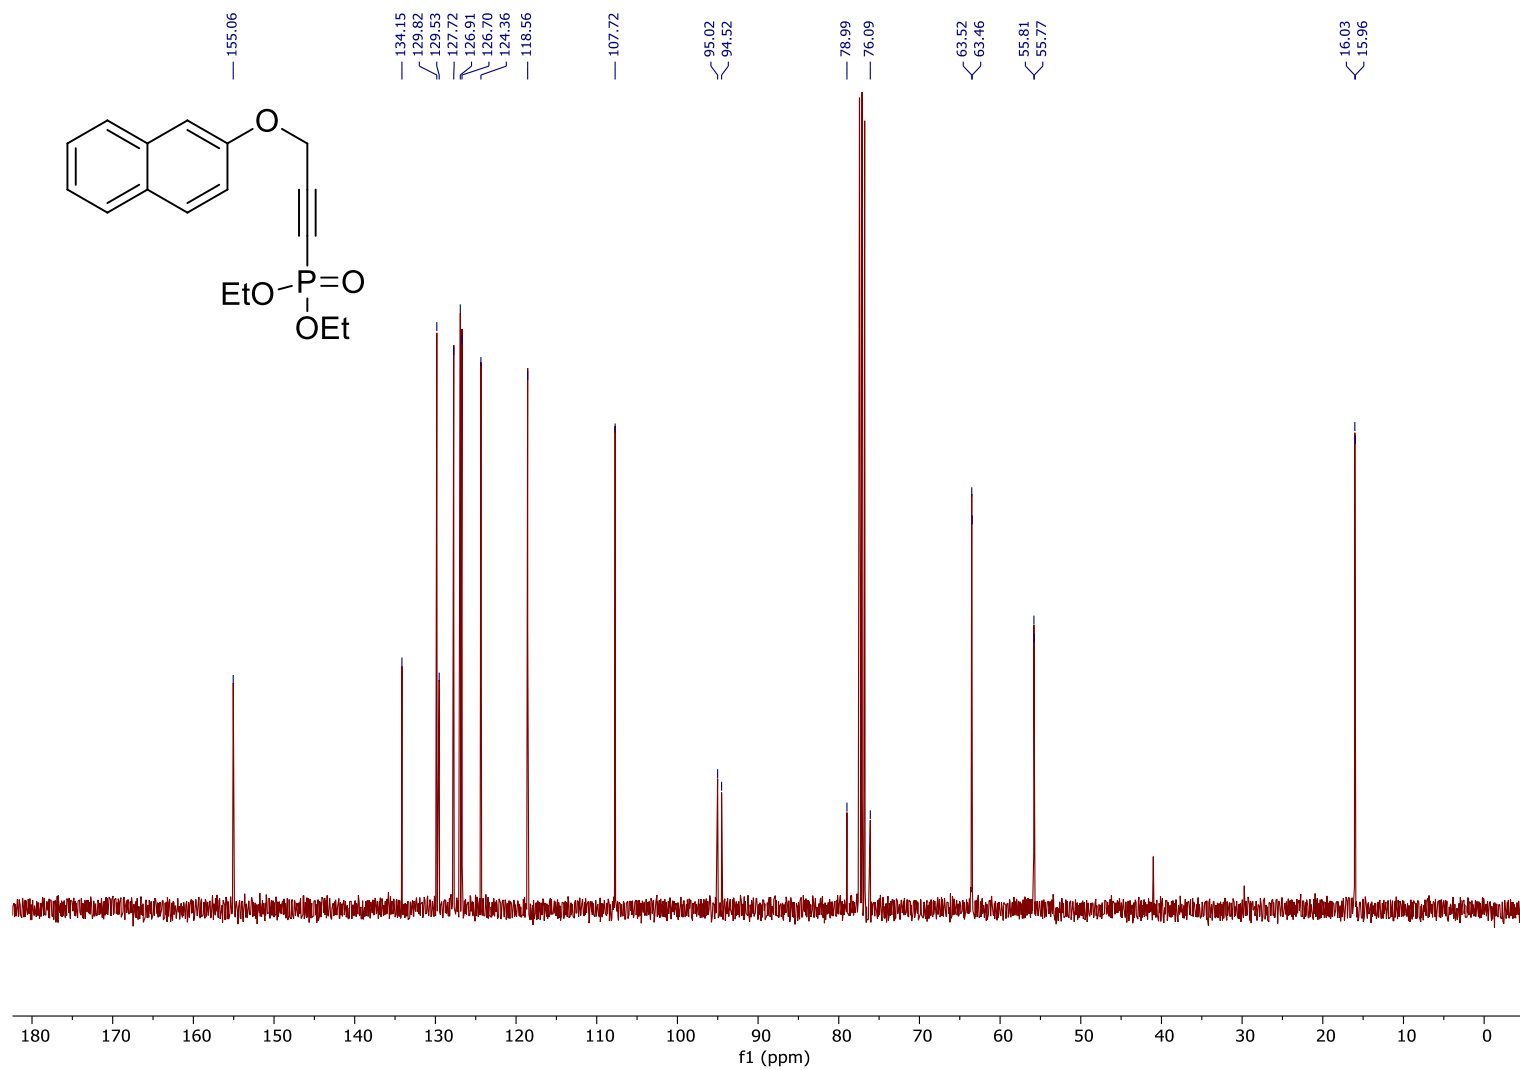

Figure S50:  $^{13}\text{C}$  NMR Spectra of 3r

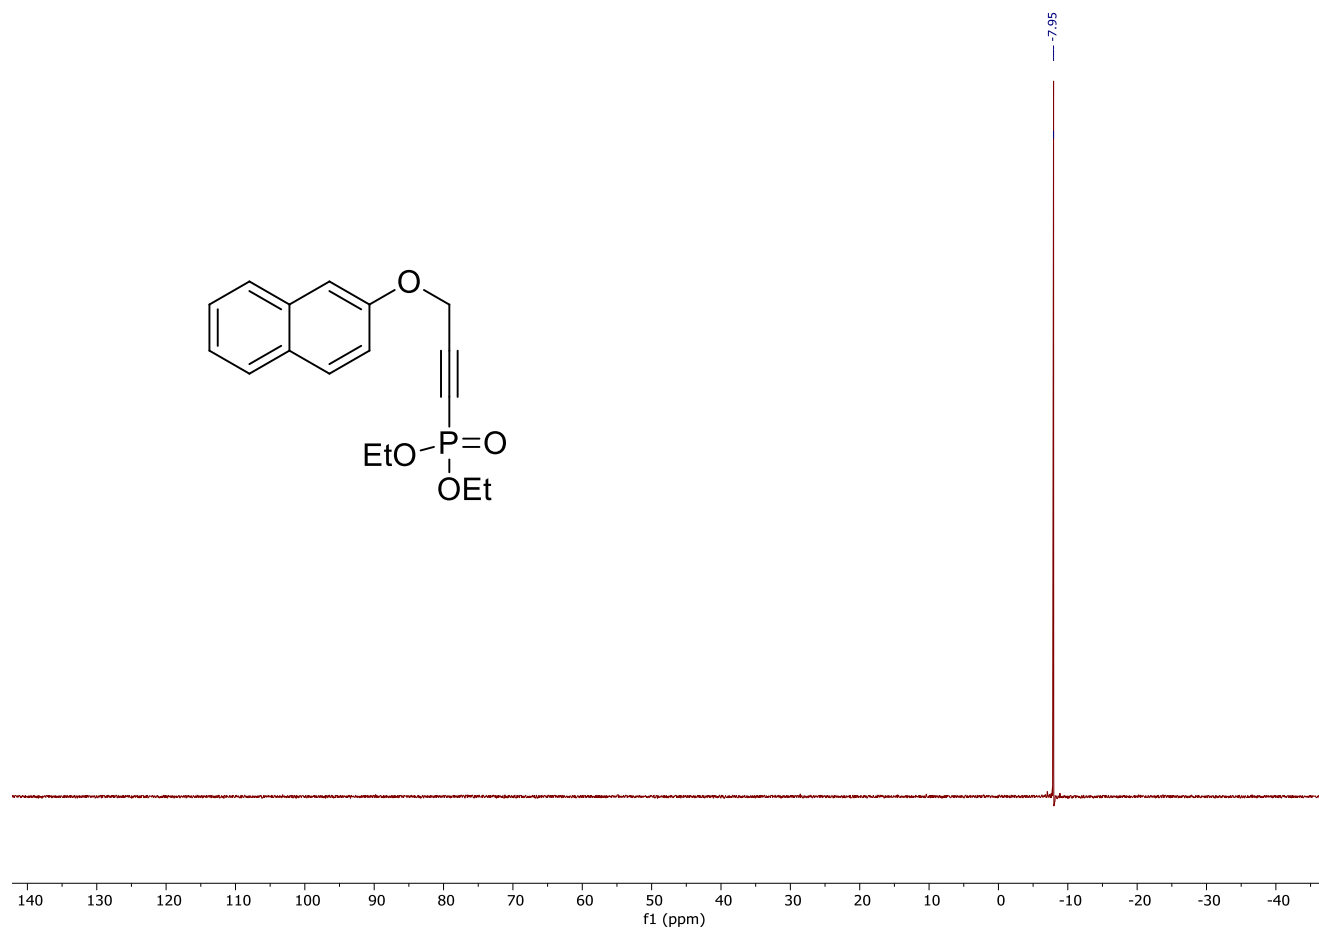

Figure S51: <sup>31</sup>P NMR Spectra of 3r

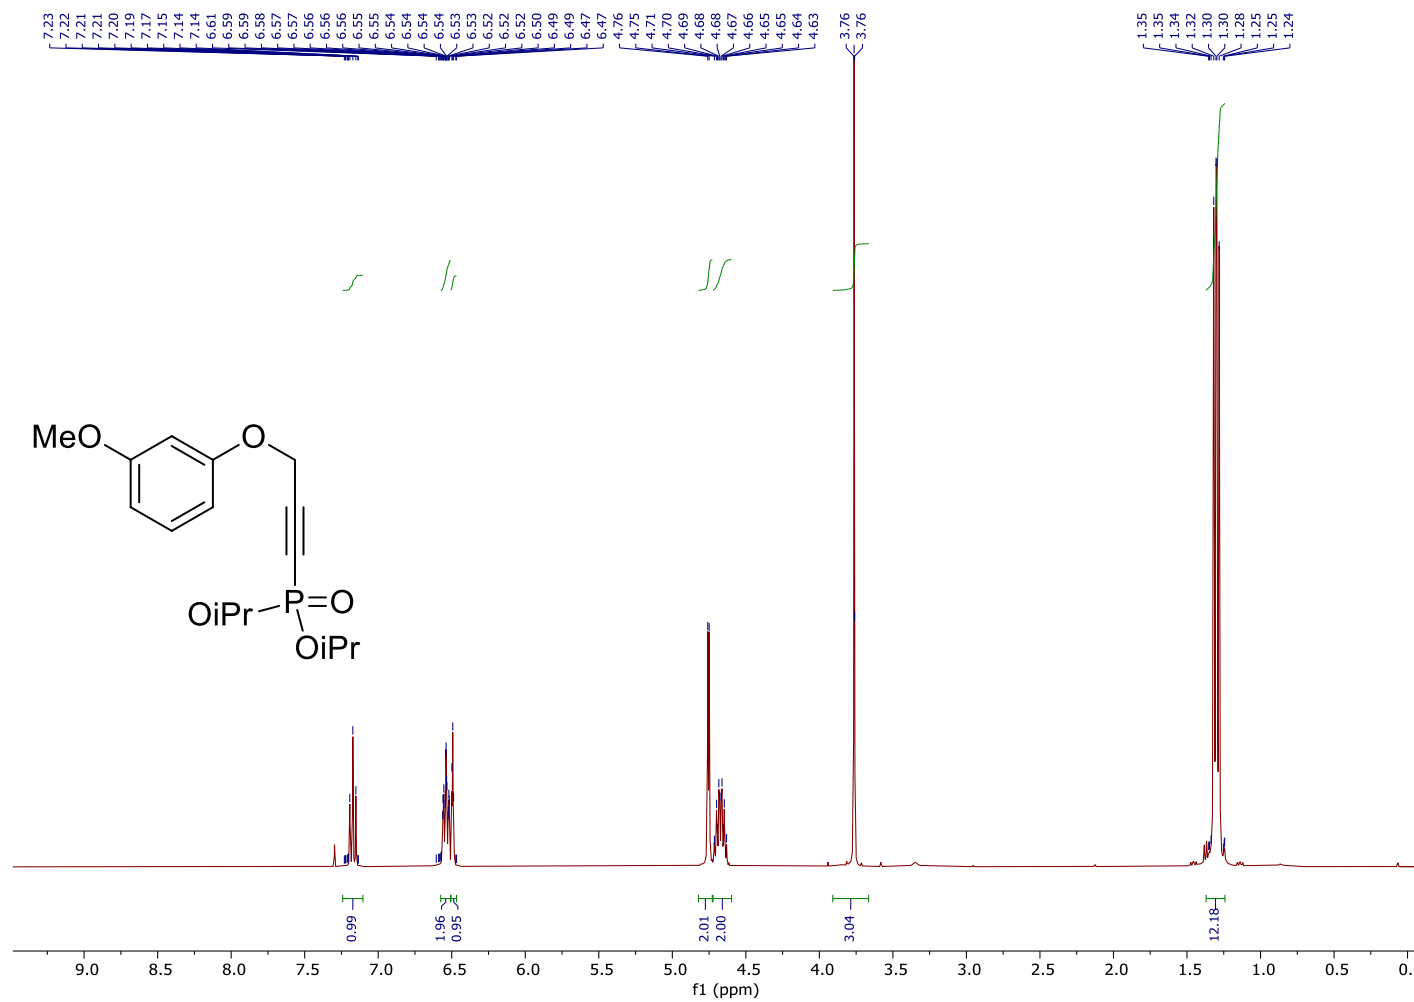

Figure S52: <sup>1</sup>H NMR Spectra of 3s

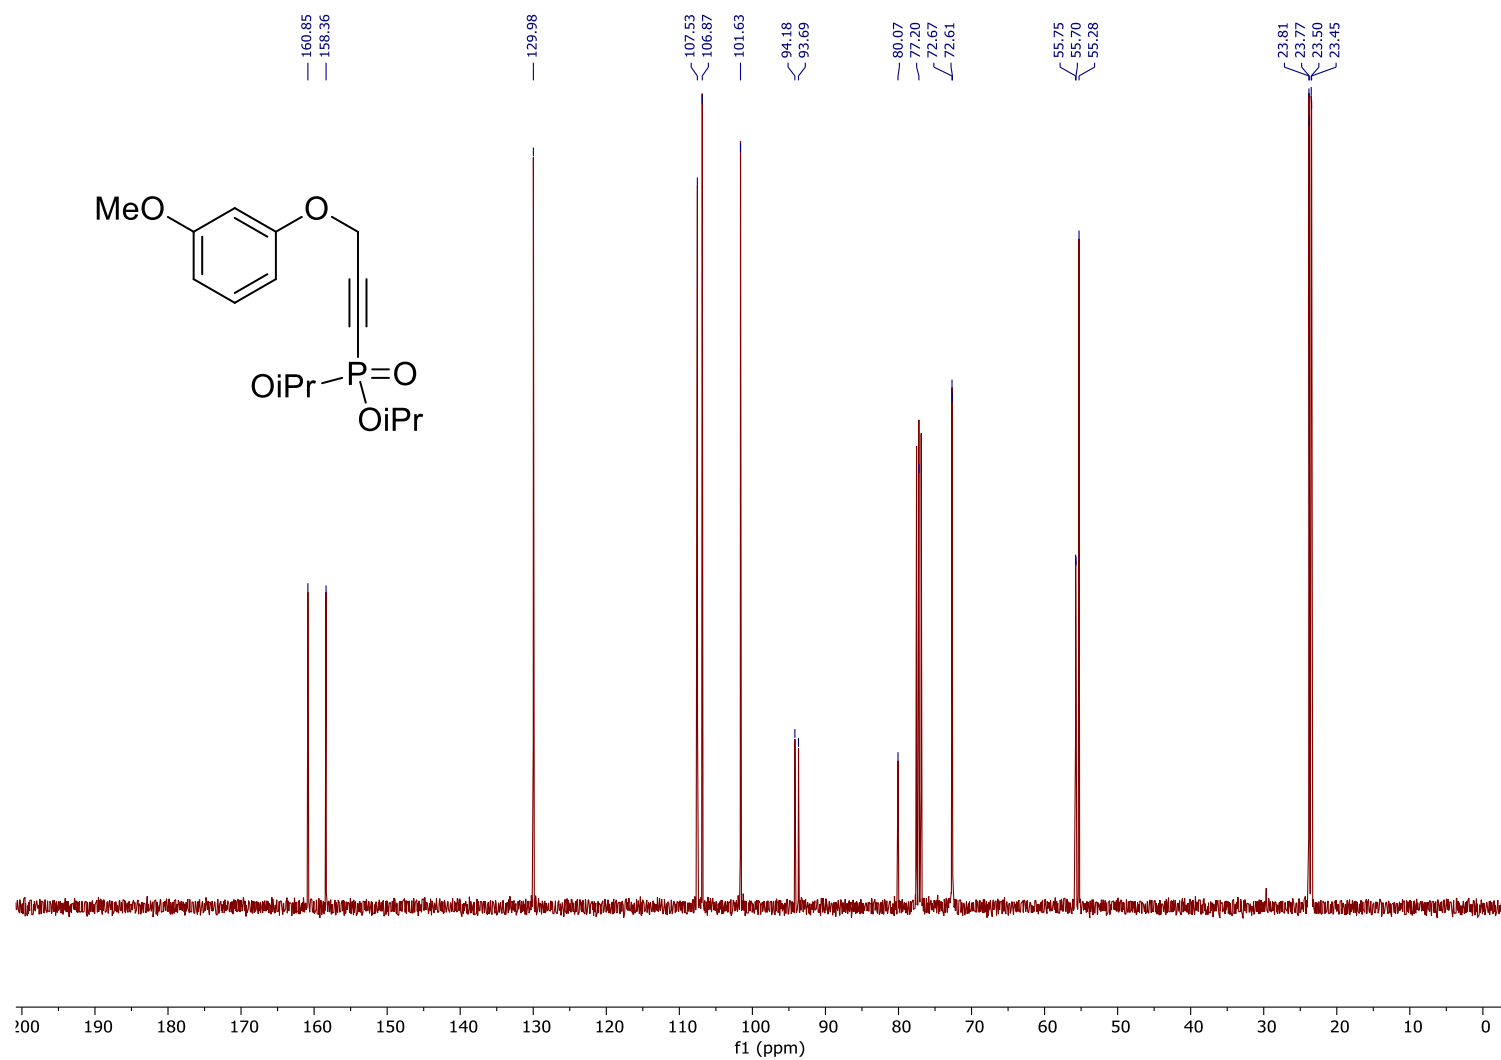

Figure S53:  $^{13}\text{C}$  NMR Spectra of 3s

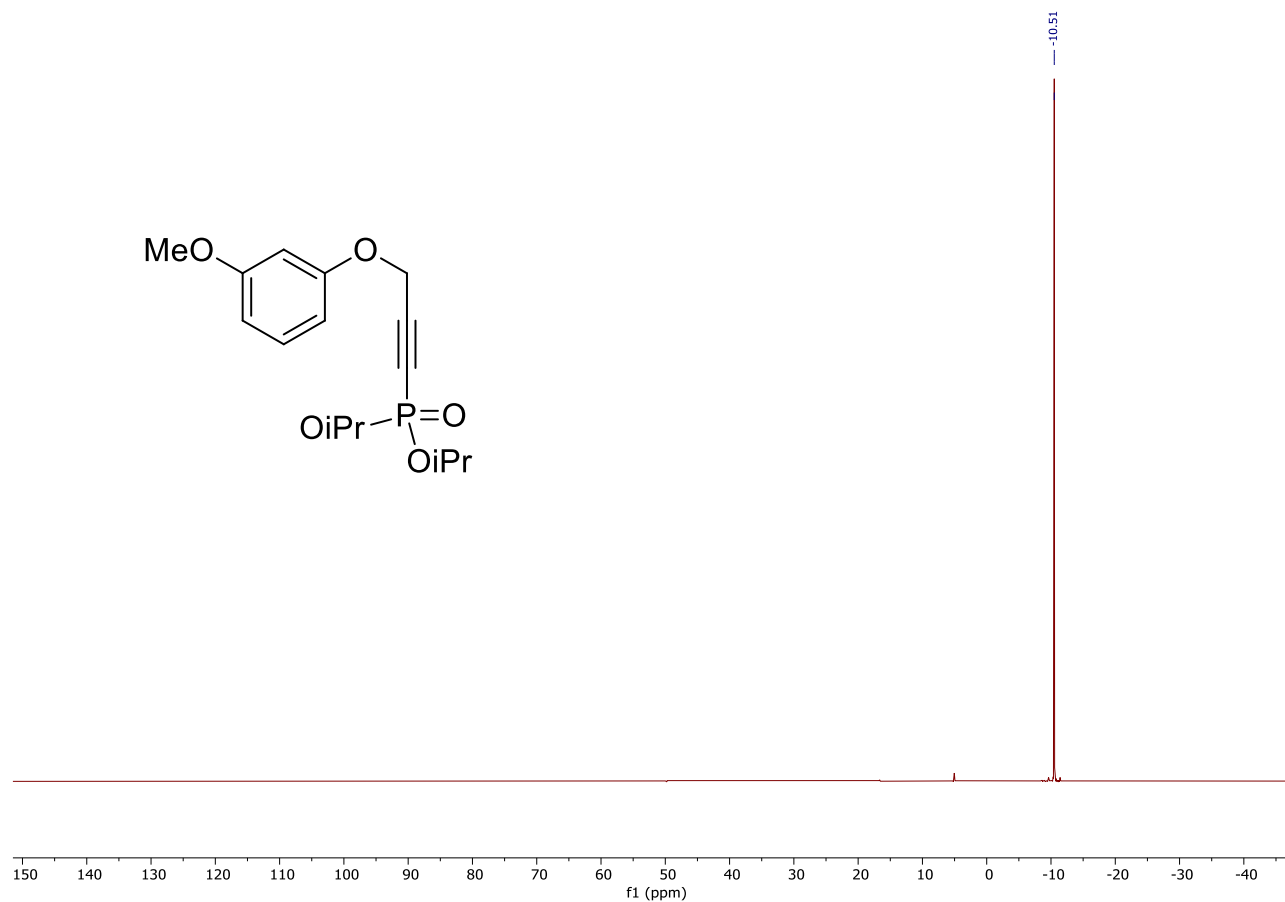

Figure S54: <sup>31</sup>P NMR Spectra of 3s

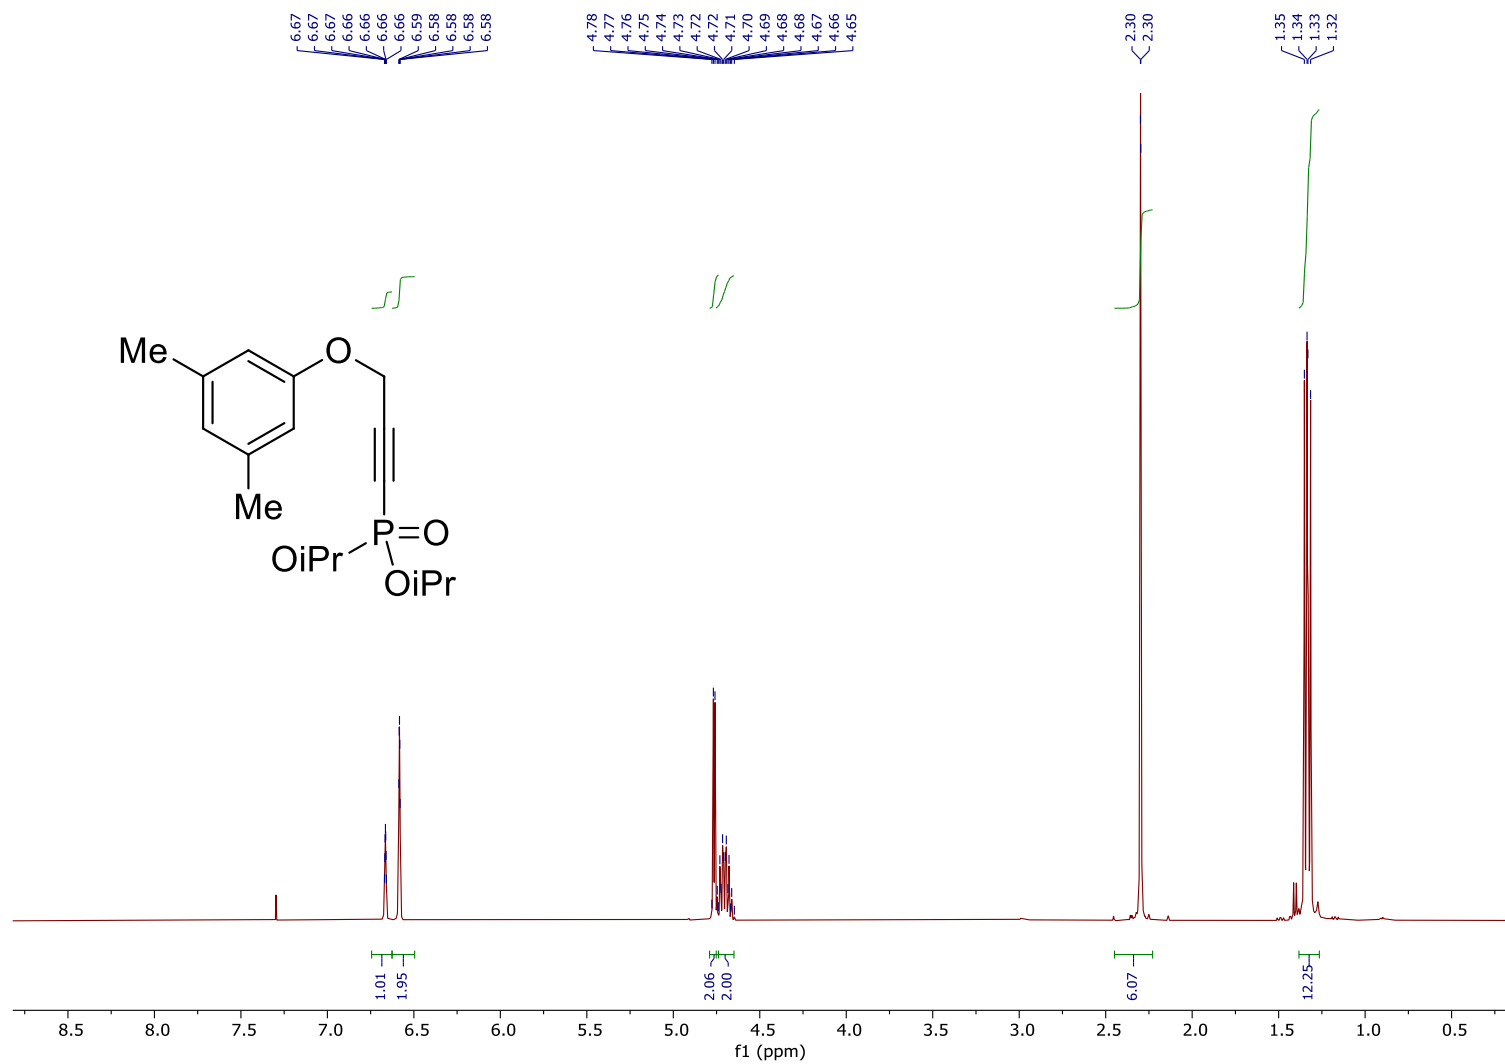

Figure S55: <sup>1</sup>H NMR Spectra of 3t

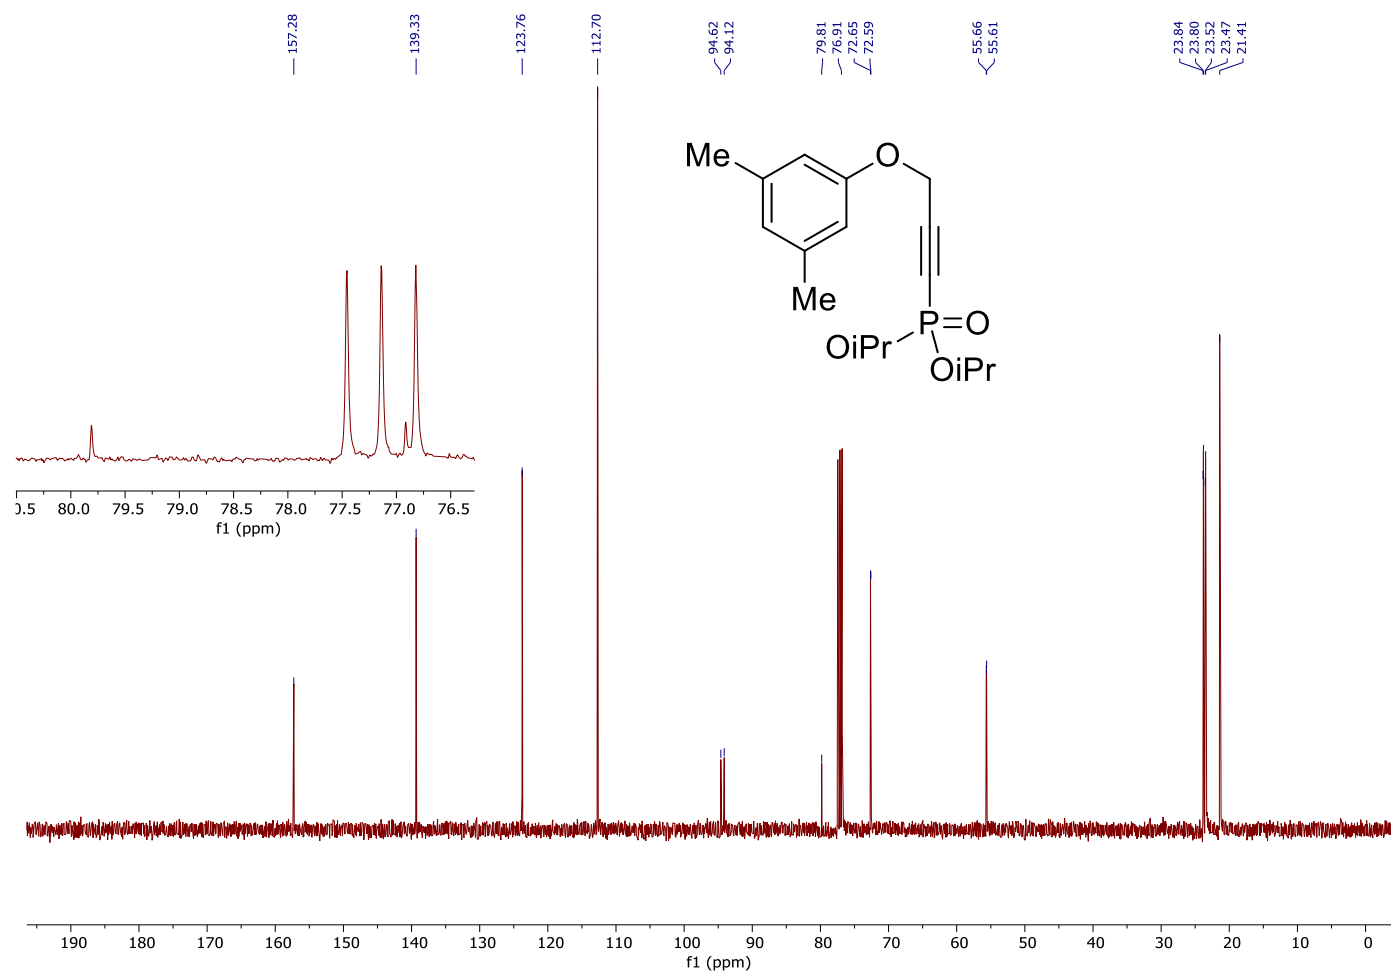

Figure S56: <sup>13</sup>C NMR Spectra of 3t

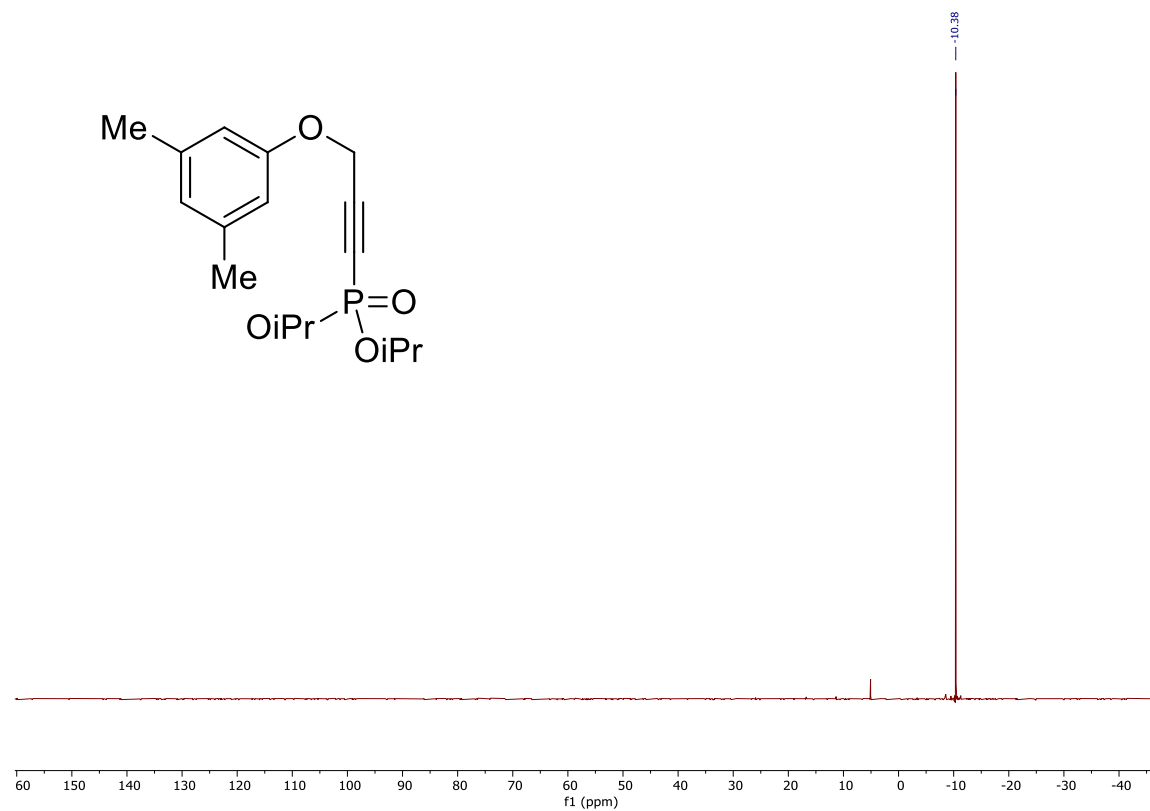

**Figure S57: <sup>31</sup>P NMR Spectra of 3t**
